# Supplementary material
Source: PubMed Central journal article supplement (PMC7125034)
Supplement: NIHMS1550109-supplement-Appendix_file_1.pdf [file NIHMS1550109-supplement-Appendix_file_1.pdf]

# AKT1 E17K Activating Mutation in Human Breast Cancer

---

# Data Abstraction Guide: GENIE AKT1 Breast Cancer Project

---

## Table of Contents

|                                                                                |    |
|--------------------------------------------------------------------------------|----|
| STUDY OBJECTIVES .....                                                         | 7  |
| STUDY INFORMATION .....                                                        | 8  |
| Overall PIs.....                                                               | 8  |
| Participating Centers .....                                                    | 8  |
| Data Abstraction Information .....                                             | 8  |
| ELIGIBILITY CRITERIA SECTION .....                                             | 10 |
| Patient ID.....                                                                | 11 |
| GENIE/SAGE Patient ID.....                                                     | 11 |
| Was there a diagnosis of breast cancer?.....                                   | 12 |
| Was there a diagnosis of distant metastatic breast cancer?.....                | 12 |
| Was there an AKT1 mutation status available?.....                              | 12 |
| Was there at least one biopsy with an Estrogen Receptor Positive Status? ..... | 13 |
| Was there at least one biopsy with a HER2 Negative Status?.....                | 13 |
| Eligibility Calculation - Automated .....                                      | 13 |
| Form Status: Complete?.....                                                    | 13 |
| PATIENT INFORMATION SECTION .....                                              | 15 |
| Patient’s Date of Birth .....                                                  | 15 |
| Patient’s Birth Year.....                                                      | 16 |
| Patient’s Gender.....                                                          | 16 |
| Patient’s Primary Race .....                                                   | 17 |
| Patient’s Secondary Race .....                                                 | 17 |
| Patient’s Tertiary Race .....                                                  | 18 |
| Patient’s Ethnicity.....                                                       | 18 |
| Patient’s Vital Status .....                                                   | 19 |
| Patient’s Date of Death .....                                                  | 19 |
| Patient’s Date of Death Interval, in Days - Automated .....                    | 19 |
| Patient’s Date of Last Follow-up.....                                          | 20 |
| Patient’s Follow-up Date Interval, in Days - Automated .....                   | 20 |
| Form Status: Complete?.....                                                    | 20 |

# Data Abstraction Guide: GENIE AKT1 Breast Cancer Project

---

|                                                                                                                                                                                        |    |
|----------------------------------------------------------------------------------------------------------------------------------------------------------------------------------------|----|
| DIAGNOSIS INFORMATION SECTION.....                                                                                                                                                     | 22 |
| Primary Diagnosis of Breast Cancer Sub-Section .....                                                                                                                                   | 22 |
| Date of Primary Diagnosis .....                                                                                                                                                        | 23 |
| Date of Primary Diagnosis Interval, in Days - Automated .....                                                                                                                          | 24 |
| Tumor Type [Onco-Tree Code] .....                                                                                                                                                      | 24 |
| AJCC Stage (Version 7) at Primary Diagnosis.....                                                                                                                                       | 25 |
| Overall Tumor Grade.....                                                                                                                                                               | 25 |
| Lymphovascular Invasion – LVI.....                                                                                                                                                     | 25 |
| Progesterone Receptor – PR status.....                                                                                                                                                 | 25 |
| Estrogen Receptor – ER status .....                                                                                                                                                    | 26 |
| HER2 Status .....                                                                                                                                                                      | 26 |
| Is the Oncotype DX Score Known? .....                                                                                                                                                  | 27 |
| Oncotype DX Score.....                                                                                                                                                                 | 27 |
| Loco-regional Recurrence (LRR) Sub-Section .....                                                                                                                                       | 28 |
| Was there any recurrence of tumor in the ipsilateral chest wall or in mastectomy scars, in the ipsilateral supraclavicular, infraclavicular, axillary, or internal mammary nodes?..... | 28 |
| Date of LRR .....                                                                                                                                                                      | 29 |
| LRR Date Interval, in Days - Automated .....                                                                                                                                           | 30 |
| Site of LRR.....                                                                                                                                                                       | 30 |
| Distant Metastatic Diagnosis (de novo or relapsed) Sub-Section .....                                                                                                                   | 31 |
| Date of Radiologically Confirmed Distant Metastatic Disease .....                                                                                                                      | 32 |
| Distant Metastatic Disease Interval, in Days - Automated.....                                                                                                                          | 33 |
| Was a biopsy performed of metastatic site?.....                                                                                                                                        | 33 |
| Did the ER/PR/HER2 status differ (positive to negative or vice versa) from primary tumor?.....                                                                                         | 33 |
| PR Status Change.....                                                                                                                                                                  | 34 |
| ER Status Change.....                                                                                                                                                                  | 34 |
| HER2 Status Change .....                                                                                                                                                               | 35 |
| Met Site: Bone.....                                                                                                                                                                    | 35 |
| Met Site: Liver .....                                                                                                                                                                  | 35 |
| Met Site: Lung .....                                                                                                                                                                   | 36 |
| Met Site: Brain.....                                                                                                                                                                   | 36 |
| Met Site: Lymph Node (do not include local or regional) .....                                                                                                                          | 37 |

# Data Abstraction Guide: GENIE AKT1 Breast Cancer Project

---

|                                                                  |    |
|------------------------------------------------------------------|----|
| Met Site: Soft Tissue.....                                       | 37 |
| Met Site: Other Site.....                                        | 38 |
| Met Site: Which Site? .....                                      | 38 |
| Other (Non-Breast) Cancer Diagnoses Sub-Section .....            | 39 |
| Has the patient had another (non-Breast) cancer diagnosis? ..... | 39 |
| Number of non-Breast cancer diagnoses .....                      | 39 |
| Non-Breast Diagnosis Oncotree Code, Number 1 .....               | 40 |
| Non-Breast Diagnosis Oncotree Code, Number 2 .....               | 40 |
| Non-Breast Diagnosis Oncotree Code, Number 3 .....               | 40 |
| Form Status: Complete? .....                                     | 40 |
| TUMOR SAMPLE SEQUENCING INFORMATION.....                         | 42 |
| Date sample was collected.....                                   | 43 |
| Sample Date Interval – Automated .....                           | 44 |
| Sample Type .....                                                | 44 |
| Date of the Sequencing Report .....                              | 44 |
| Sequence Report Date Interval - Automated .....                  | 45 |
| GENIE Sample ID (if available) .....                             | 45 |
| Sequencing Method .....                                          | 45 |
| Specify Sequence Method.....                                     | 45 |
| Progesterone Receptor – PR status of the Sequenced Sample.....   | 46 |
| HER2 Status of the Sequenced Sample .....                        | 46 |
| Estrogen Receptor – ER status of the Sequenced Sample.....       | 46 |
| AKT Mutation Status .....                                        | 47 |
| AKT Variant 1.....                                               | 47 |
| AKT Variant 2.....                                               | 47 |
| ERBB2 Mutation Status .....                                      | 47 |
| ERBB2 Variant.....                                               | 48 |
| ESR1 Mutation Status.....                                        | 48 |
| ESR1 Variant .....                                               | 48 |
| PIK3CA Mutation Status .....                                     | 48 |
| PIK3CA Variant .....                                             | 49 |

# Data Abstraction Guide: GENIE AKT1 Breast Cancer Project

---

|                                                                                                                |    |
|----------------------------------------------------------------------------------------------------------------|----|
| Was another (breast cancer) sample sequenced in this patient? .....                                            | 49 |
| TREATMENT REGIMENS .....                                                                                       | 50 |
| Primary Diagnosis: Treatment Regimen.....                                                                      | 50 |
| Was Chemotherapy (CT) received after primary diagnosis date but before LRR or distant metastatic date?51       |    |
| Was Hormone therapy (HT) received after primary diagnosis date but before LRR or distant metastatic date?..... | 52 |
| Was this administered as part of a combination therapy with ovarian suppression or other? .....                | 52 |
| Therapy 1.....                                                                                                 | 52 |
| Was this administered as part of the clinical trial? .....                                                     | 53 |
| Therapy 1, Specify .....                                                                                       | 53 |
| Therapy 1 Start Date .....                                                                                     | 53 |
| Therapy 1 Start Interval.....                                                                                  | 54 |
| Therapy 1 End Date .....                                                                                       | 55 |
| Therapy 1 End Interval .....                                                                                   | 56 |
| Was drug discontinued?.....                                                                                    | 56 |
| Reason for Discontinuation .....                                                                               | 56 |
| LRR: Treatment Regimens .....                                                                                  | 57 |
| Was CT received after LRR date but before distant metastatic diagnosis date?.....                              | 57 |
| Was HT received after LRR date but before distant metastatic diagnosis date? .....                             | 58 |
| Was this administered as part of a combination therapy with ovarian suppression or other? .....                | 58 |
| Therapy 1.....                                                                                                 | 58 |
| Was this administered as part of the clinical trial? .....                                                     | 59 |
| Therapy 1, Specify .....                                                                                       | 59 |
| Therapy 1 Start Date .....                                                                                     | 59 |
| Therapy 1 Start Interval.....                                                                                  | 60 |
| Therapy 1 End Date .....                                                                                       | 60 |
| Therapy 1 End Interval .....                                                                                   | 61 |
| Was drug discontinued?.....                                                                                    | 62 |
| Reason for Discontinuation .....                                                                               | 62 |
| Metastatic Diagnosis: Therapy .....                                                                            | 64 |
| Does this therapy involve a combination regimen?.....                                                          | 64 |
| How many drugs are part of the therapy? .....                                                                  | 65 |

# Data Abstraction Guide: GENIE AKT1 Breast Cancer Project

---

|                                                            |    |
|------------------------------------------------------------|----|
| Drug 1 .....                                               | 65 |
| Was this administered as part of the clinical trial? ..... | 65 |
| Was the drug AZD5363? .....                                | 65 |
| Generic name of drug .....                                 | 66 |
| Therapy 1 Start Date .....                                 | 66 |
| Therapy 1 Start Interval .....                             | 67 |
| Therapy 1 End Date .....                                   | 67 |
| Therapy 1 End Interval .....                               | 68 |
| Was drug discontinued? .....                               | 69 |
| Reason for Discontinuation .....                           | 69 |
| Form Status: Complete? .....                               | 69 |

# Data Abstraction Guide: GENIE AKT1 Breast Cancer Project

---

## STUDY OBJECTIVES

In a multi-center, retrospective and controlled study we plan to describe the clinicopathological features, response to standard therapies and outcome of ER + MBC patients, found to be *AKT1* E17K mutant (mt) on tumor sequencing vs those found to be *AKT1* E17K wild type (wt).

- *Primary Endpoint:* Overall Survival (OS) from date of metastatic diagnosis
- *Secondary Endpoints:*
  1. Duration on Therapy (DOT) for the first line of therapy used after metastatic diagnosis. This analysis will be repeated for the second line metastatic therapy and additional lines of therapy as sample size permits.
  2. Given the potential association of AKT mutation with response to rapalogs such as everolimus and temsirolimus, we plan to look specifically at DOT with mTOR inhibitor containing therapy across all lines of therapy in the AKT mt and wt cohorts.

# Data Abstraction Guide: GENIE AKT1 Breast Cancer Project

---

## STUDY INFORMATION

### Overall PIs

- David Hyman, MSK
- Lillian Smyth, MSK
- Phillipe Bedard, UHN

### Participating Centers

| Center                             | PI/Contact                              | Data Abstractor(s)                    | Data Manager          |
|------------------------------------|-----------------------------------------|---------------------------------------|-----------------------|
| Dana-Farber Cancer Institute (DFC) | Michael Hassett, MD<br>Deb Schrag, MD   | Sindy Ortiz Pimentel                  | Eva Lepisto           |
| GRR                                | Fabrice Andre, MD<br>Monica Ardenos, MD | Semih Dogan                           |                       |
| HOP                                | Ben Park, MD                            | Ben Park, MD                          | Christopher Gocke, MD |
| MDA                                | Funda Meric-Bernstam, MD                | Chetna Wathoo<br>Walter Kinyua        | Kenna Shaw            |
| MSK                                | David Hyman, MD<br>Lillian Smyth, MD    | Odette Hauke<br>Sarah Lendore         | Natalie Blauvelt      |
| NKI                                | Hugo Horlings, MD                       | Tessa Steenbruggen, MD<br>Jan Hudecek |                       |
| PMH                                | Phillipe Bedard, MD                     | Lailah Ahmed<br>Geeta Krishna         | Celeste Yu            |
| VDB                                | Mia Levy, MD<br>Christine Micheel, PhD  | Michele LeNoue-Newton<br>Lucy Wang    | Christine Micheel     |

### Data Abstraction Information

REDCap URL: <https://redcap.mskcc.org/>

BaseCamp URL: <https://basecamp.com/2944763/projects/13104837/>

Process for Asking Questions During Data Collection:

1. Ask Center PI
2. Post BaseCamp Question to Group
3. Lillian will answer the question
4. Celeste will update Data Abstraction Guide to reflect answer





# Data Abstraction Guide: GENIE AKT1 Breast Cancer Project

---

## ELIGIBILITY CRITERIA SECTION

### General Abstracting Notes:

1. In this section, patient data will be entered to determine whether the patient is eligible for continued data collection in the study. In order for a patient to be included in the study, the patient must meet the following criteria:
  - Invasive breast cancer
  - Distant metastatic site of breast cancer
  - AKT1 genomic mutation status (mutant or wildtype)
  - Estrogen Receptor (ER) status is positive (at least one)
  - HER2 status is negative (at least one)
2. In the eligibility form, information on each of these criteria will be recorded.
3. Prior to data entry, assign the record to a Data Access Group based on your center, using one of the following:
  - DFC
  - GTR
  - HOP
  - MDA
  - MSK
  - NKI
  - PMH
  - VDB

# Data Abstraction Guide: GENIE AKT1 Breast Cancer Project

**Eligibility Criteria**

Assign record to a Data Access Group? -- select a group --

---

+ Adding new Record ID 1

Record ID 1

**Patient ID** [Text Input]  
\* must provide value Locally Nominated Patient ID Linked to Patient MRN, DO NOT ENTER SITE SPECIFIC MRN!

**GENIE/SAGE Patient ID:** [Text Input]  
\* must provide value NOT GENIE/SAGE SAMPLE ID

**Was there a diagnosis of breast cancer?** radio Yes  
radio No  
\* must provide value reset

**Was there a diagnosis of distant metastatic breast cancer?** radio Yes  
radio No  
\* must provide value reset

**Was there an AKT1 mutation status available?** radio Yes  
radio No  
\* must provide value reset

**Was there at least one biopsy with Estrogen Receptor Positive Status?** radio Yes  
radio No  
\* must provide value reset

**Was there at least one biopsy with a HER2 Negative Status?** radio Yes  
radio No  
\* must provide value reset

**Form Status**

Complete? [Incomplete v]

Save Record  
Save and Continue  
Save and go to Next Form  
-- Cancel --

| Field Label                 | Patient ID                                                                                                                                                                                                                                                                      |
|-----------------------------|---------------------------------------------------------------------------------------------------------------------------------------------------------------------------------------------------------------------------------------------------------------------------------|
| <b>REDCap Variable Name</b> | patient_id                                                                                                                                                                                                                                                                      |
| <b>Field Type</b>           | text                                                                                                                                                                                                                                                                            |
| <b>Directives</b>           | Locally Nominated Patient ID<br>This identifier should be maintained at the site linked to the center’s MRN in a separate place accessible only to the center’s study staff. The patients actual MRN should not be used.                                                        |
| <b>Identifier?</b>          | Y                                                                                                                                                                                                                                                                               |
| <b>Required Field?</b>      | Y                                                                                                                                                                                                                                                                               |
| Field Label                 | GENIE/SAGE Patient ID                                                                                                                                                                                                                                                           |
| <b>REDCap Variable Name</b> | genie_patient_id                                                                                                                                                                                                                                                                |
| <b>Field Type</b>           | text                                                                                                                                                                                                                                                                            |
| <b>Directives</b>           | Record the existing <b>GENIE/SAGE ID</b> , if the patient’s genomic data was submitted to in the September 2016 data submission. This identifier is maintained at each center and is linked to the patient’s MRN. For more details and access to the <b>GENIE/SAGE ID</b> , ask |

# Data Abstraction Guide: GENIE AKT1 Breast Cancer Project

|                             |                                                                                                                                                                                                                                                                                                                                                                                                                                                  |
|-----------------------------|--------------------------------------------------------------------------------------------------------------------------------------------------------------------------------------------------------------------------------------------------------------------------------------------------------------------------------------------------------------------------------------------------------------------------------------------------|
|                             | <p>the Center Site PI for this project.</p> <p>If there is no existing GENIE ID, leave this field blank OR create a new GENIE ID that will continue to be used in reference to this case for future GENIE data submissions.</p>                                                                                                                                                                                                                  |
| <b>Identifier?</b>          | Y                                                                                                                                                                                                                                                                                                                                                                                                                                                |
| <b>Required Field?</b>      | N                                                                                                                                                                                                                                                                                                                                                                                                                                                |
| <b>Field Label</b>          | <b>Was there a diagnosis of breast cancer?</b>                                                                                                                                                                                                                                                                                                                                                                                                   |
| <b>REDCap Variable Name</b> | eligible_breastca_yn                                                                                                                                                                                                                                                                                                                                                                                                                             |
| <b>Field Type</b>           | yesno                                                                                                                                                                                                                                                                                                                                                                                                                                            |
| <b>Directives</b>           | Record whether the patient has had a diagnosis of breast cancer.                                                                                                                                                                                                                                                                                                                                                                                 |
| <b>Identifier?</b>          | N                                                                                                                                                                                                                                                                                                                                                                                                                                                |
| <b>Required Field?</b>      | Y                                                                                                                                                                                                                                                                                                                                                                                                                                                |
| <b>Field Label</b>          | <b>Was there a diagnosis of distant metastatic breast cancer?</b>                                                                                                                                                                                                                                                                                                                                                                                |
| <b>REDCap Variable Name</b> | eligibile_metsdx_yn                                                                                                                                                                                                                                                                                                                                                                                                                              |
| <b>Field Type</b>           | yesno                                                                                                                                                                                                                                                                                                                                                                                                                                            |
| <b>Directives</b>           | <p>Linked to <b><i>Was there a diagnosis of breast cancer?</i></b></p> <p>Record 'Yes' if the patient has a distant site of breast cancer that is proven either by imaging or pathology.</p> <p>Record 'No' if there is no indication in the EMR that the patient has experienced a distant site of metastasis of breast cancer.</p> <p>This data field is one of five that establishes the eligibility of the patient for the AKT1 project.</p> |
| <b>Identifier?</b>          | N                                                                                                                                                                                                                                                                                                                                                                                                                                                |
| <b>Required Field?</b>      | Y                                                                                                                                                                                                                                                                                                                                                                                                                                                |
| <b>Field Label</b>          | <b>Was there an AKT1 mutation status available?</b>                                                                                                                                                                                                                                                                                                                                                                                              |
| <b>REDCap Variable Name</b> | elgibile_akt1_yn                                                                                                                                                                                                                                                                                                                                                                                                                                 |
| <b>Field Type</b>           | yesno                                                                                                                                                                                                                                                                                                                                                                                                                                            |
| <b>Directives</b>           | <p>Linked to <b><i>Was there a diagnosis of breast cancer?</i></b></p> <p>Record 'Yes' if the patient has an AKT1 mutation status associated with the breast cancer.</p> <p>Record 'No' if there is no indication that the patient's breast cancer an associated either an AKT1 mutation or AKT1 wildtype status.</p> <p>This data field is one of five that establishes the eligibility of the patient for the AKT1 project.</p>                |
| <b>Identifier?</b>          | N                                                                                                                                                                                                                                                                                                                                                                                                                                                |
| <b>Required Field?</b>      | Y                                                                                                                                                                                                                                                                                                                                                                                                                                                |

# Data Abstraction Guide: GENIE AKT1 Breast Cancer Project

|                             |                                                                                                                                                                                                                                                                                                                                                                                                                                                                                                                                                                                          |
|-----------------------------|------------------------------------------------------------------------------------------------------------------------------------------------------------------------------------------------------------------------------------------------------------------------------------------------------------------------------------------------------------------------------------------------------------------------------------------------------------------------------------------------------------------------------------------------------------------------------------------|
| <b>Field Label</b>          | <b>Was there at least one biopsy with an Estrogen Receptor Positive Status?</b>                                                                                                                                                                                                                                                                                                                                                                                                                                                                                                          |
| <b>REDCap Variable Name</b> | eligibile_estrogen_yn                                                                                                                                                                                                                                                                                                                                                                                                                                                                                                                                                                    |
| <b>Field Type</b>           | yesno                                                                                                                                                                                                                                                                                                                                                                                                                                                                                                                                                                                    |
| <b>Directives</b>           | <p>Linked to <b><i>Was there a diagnosis of breast cancer?</i></b></p> <p>Record 'Yes' if the patient's breast cancer has ever had a pathology report stating that the breast cancer was estrogen receptor positive. The report could pertain to a biopsy or surgical procedure associated with initial diagnosis, recurrence, or distant metastasis.</p> <p>Record 'No' if there is no indication that the patient's breast cancer was ever estrogen receptor positive.</p> <p>This data field is one of five that establishes the eligibility of the patient for the AKT1 project.</p> |
| <b>Identifier?</b>          | N                                                                                                                                                                                                                                                                                                                                                                                                                                                                                                                                                                                        |
| <b>Required Field?</b>      | Y                                                                                                                                                                                                                                                                                                                                                                                                                                                                                                                                                                                        |
| <b>Field Label</b>          | <b>Was there at least one biopsy with a HER2 Negative Status?</b>                                                                                                                                                                                                                                                                                                                                                                                                                                                                                                                        |
| <b>REDCap Variable Name</b> | eligibile_her2                                                                                                                                                                                                                                                                                                                                                                                                                                                                                                                                                                           |
| <b>Field Type</b>           | yesno                                                                                                                                                                                                                                                                                                                                                                                                                                                                                                                                                                                    |
| <b>Directives</b>           | <p>Linked to <b><i>Was there a diagnosis of breast cancer?</i></b></p> <p>Record 'Yes' if the has ever had a pathology report stating that the breast cancer was HER2 negative. The pathology report could pertain to a biopsy or surgical procedure associated with initial diagnosis, recurrence, or distant metastasis.</p> <p>Record 'No' if there is no indication that the patient's breast cancer was ever HER2 negative.</p> <p>This data field is one of five that establishes the eligibility of the patient for the AKT1 project.</p>                                         |
| <b>Identifier?</b>          | N                                                                                                                                                                                                                                                                                                                                                                                                                                                                                                                                                                                        |
| <b>Required Field?</b>      | Y                                                                                                                                                                                                                                                                                                                                                                                                                                                                                                                                                                                        |
| <b>Field Label</b>          | <b>Eligibility Calculation - Automated</b>                                                                                                                                                                                                                                                                                                                                                                                                                                                                                                                                               |
| <b>REDCap Variable Name</b> | elg_warning                                                                                                                                                                                                                                                                                                                                                                                                                                                                                                                                                                              |
| <b>Field Type</b>           | Calculated: [eligibile_breastca_yn] = '0' or [eligibile_metsdx_yn] = '0' or [eligibile_akt1_yn] = '0' or [eligibile_estrogen_yn] = '0' or [eligibile_her2] = '0'                                                                                                                                                                                                                                                                                                                                                                                                                         |
| <b>Directives</b>           | If any of the questions in the eligibility section were answered with a 'No' the patient is not be eligible for the AKT1 study.                                                                                                                                                                                                                                                                                                                                                                                                                                                          |
| <b>Identifier?</b>          | N                                                                                                                                                                                                                                                                                                                                                                                                                                                                                                                                                                                        |
| <b>Required Field?</b>      | Coded                                                                                                                                                                                                                                                                                                                                                                                                                                                                                                                                                                                    |
| <b>Field Label</b>          | <b>Form Status: Complete?</b>                                                                                                                                                                                                                                                                                                                                                                                                                                                                                                                                                            |

# Data Abstraction Guide: GENIE AKT1 Breast Cancer Project

---

|                             |                                                                                                                                                                                                                                                                                                                                              |
|-----------------------------|----------------------------------------------------------------------------------------------------------------------------------------------------------------------------------------------------------------------------------------------------------------------------------------------------------------------------------------------|
| <b>REDCap Variable Name</b> |                                                                                                                                                                                                                                                                                                                                              |
| <b>Field Type</b>           | Dropdown                                                                                                                                                                                                                                                                                                                                     |
| <b>Choice List</b>          | Incomplete   Unverified   Complete                                                                                                                                                                                                                                                                                                           |
| <b>Directives</b>           | Record 'Complete' once all of the data fields in this section have been entered and the eligibility calculation has been performed. This field will be used during data quality review.<br><br>'Incomplete' is the default choice; patients with any indication of 'Incomplete' or 'Unverified' sections are not eligible for data analysis. |
| <b>Identifier?</b>          | N                                                                                                                                                                                                                                                                                                                                            |
| <b>Required Field?</b>      | N                                                                                                                                                                                                                                                                                                                                            |

# Data Abstraction Guide: GENIE AKT1 Breast Cancer Project

## PATIENT INFORMATION SECTION

### Abstracting Notes:

1. In order to record data in this section, the patient must be eligible for the study; meaning, the patient has passed the calculated eligibility field found in the Eligibility section.
1. Much of the data fields found in this section should be provided by Sage through a download of each center’s GENIE data submission.
2. For data fields that are not pre-populated by Sage, please record the appropriate data.
3. For patients who are not found in the Genie data submission, please adhere to the NAACCR method for coding the data as applicable.

**Patient Information**

Re-assign this record to another Data Access Group? DFC

Editing existing Record ID 1 - 1a

Record ID: 1

Date of Birth:  PLEASE ENTER DATE IN MM - DD - YYYY FORMAT!

Birth Year:

Gender:

Primary Race:

Secondary Race:

Tertiary Race:

Ethnicity:

Vital Status:

Form Status

Complete?:

Save Record  
Save and Continue  
Save and go to Next Form  
-- Cancel --

| Field Label          | Patient’s Date of Birth                                                                                                                    |
|----------------------|--------------------------------------------------------------------------------------------------------------------------------------------|
| REDCap Variable Name | dob_date                                                                                                                                   |
| Field Type           | Text                                                                                                                                       |
| Valid Field          | mm-dd-yyyy                                                                                                                                 |
| Directives           | Enter the patient’s date of birth using the following convention: mm-dd-yyyy. Please note that all components of the date must be entered. |

# Data Abstraction Guide: GENIE AKT1 Breast Cancer Project

|                             |                                                                                                                                                                                                                                                                                                                                                                                                                                                                                                                                                                                                                                                                                                                                     |
|-----------------------------|-------------------------------------------------------------------------------------------------------------------------------------------------------------------------------------------------------------------------------------------------------------------------------------------------------------------------------------------------------------------------------------------------------------------------------------------------------------------------------------------------------------------------------------------------------------------------------------------------------------------------------------------------------------------------------------------------------------------------------------|
|                             | <p>If the full date is not known, estimate the date on using the components that are known.</p> <ul style="list-style-type: none"> <li>• If month and year of the date is known, and the day of the month is not known, record 15 for the day.</li> <li>• If year of the date is known, and the day and month is not known, record 6 (June) for the month and 15 for the day.</li> <li>• If the year is known, and the seasons are noted rather than the month and day, use the following: <ul style="list-style-type: none"> <li>○ For winter use January (1)</li> <li>○ For spring use April (4)</li> <li>○ For summer use July (7)</li> <li>○ For autumn/fall use October (10)</li> </ul> </li> </ul> <p>Do not leave blank.</p> |
| <b>Identifier?</b>          | Y; this data element will not be shared with MSK. It will be used to calculate the interval in days.                                                                                                                                                                                                                                                                                                                                                                                                                                                                                                                                                                                                                                |
| <b>Required Field?</b>      | Y                                                                                                                                                                                                                                                                                                                                                                                                                                                                                                                                                                                                                                                                                                                                   |
| <b>Field Label</b>          | <b>Patient's Birth Year</b>                                                                                                                                                                                                                                                                                                                                                                                                                                                                                                                                                                                                                                                                                                         |
| <b>REDCap Variable Name</b> | birth_year                                                                                                                                                                                                                                                                                                                                                                                                                                                                                                                                                                                                                                                                                                                          |
| <b>Field Type</b>           | text                                                                                                                                                                                                                                                                                                                                                                                                                                                                                                                                                                                                                                                                                                                                |
|                             | <p>The data for this field may be imported using the center's GENIE submission; if this does not occur, the data should be entered by the data abstractor.</p> <p>Linked to the <b><i>Patient's Date of Birth</i></b>.</p> <p>If the data is not pre-populated, record the 4-digit year associated with the <b><i>Patient's Date of Birth</i></b> recorded in the previous data field.</p> <p>Use the <b><i>Patient's Date of Birth</i></b> to compare the <b><i>Patient's Birth Year</i></b> with this data field; the two years should be the same.</p>                                                                                                                                                                           |
| <b>Directives</b>           | Do not leave blank.                                                                                                                                                                                                                                                                                                                                                                                                                                                                                                                                                                                                                                                                                                                 |
| <b>Identifier?</b>          | N                                                                                                                                                                                                                                                                                                                                                                                                                                                                                                                                                                                                                                                                                                                                   |
| <b>Required Field?</b>      | Y                                                                                                                                                                                                                                                                                                                                                                                                                                                                                                                                                                                                                                                                                                                                   |
| <b>Field Label</b>          | <b>Patient's Gender</b>                                                                                                                                                                                                                                                                                                                                                                                                                                                                                                                                                                                                                                                                                                             |
| <b>REDCap Variable Name</b> | naaccr_sex_code                                                                                                                                                                                                                                                                                                                                                                                                                                                                                                                                                                                                                                                                                                                     |
| <b>Field Type</b>           | dropdown                                                                                                                                                                                                                                                                                                                                                                                                                                                                                                                                                                                                                                                                                                                            |
| <b>Choice List</b>          | 1, Male   2, Female   3, Other (intersex, disorders of sexual development/DSD)   4, Transsexual, NOS   5, Transsexual, natal male   6, Transsexual, natal female   99, Not stated/Unknown                                                                                                                                                                                                                                                                                                                                                                                                                                                                                                                                           |
| <b>Directives</b>           | The data for this field may be imported using the center's GENIE submission; if this does not occur, the data should be entered by the data abstractor.                                                                                                                                                                                                                                                                                                                                                                                                                                                                                                                                                                             |
|                             | Record the sex of the patient using the NAACCR sex codes.                                                                                                                                                                                                                                                                                                                                                                                                                                                                                                                                                                                                                                                                           |



# Data Abstraction Guide: GENIE AKT1 Breast Cancer Project

|                             |                                                                                                                                                                                                                                                                                                                                                                                                                                                                                                                                                                                                                                                                                                                                          |
|-----------------------------|------------------------------------------------------------------------------------------------------------------------------------------------------------------------------------------------------------------------------------------------------------------------------------------------------------------------------------------------------------------------------------------------------------------------------------------------------------------------------------------------------------------------------------------------------------------------------------------------------------------------------------------------------------------------------------------------------------------------------------------|
|                             | Do not leave blank.                                                                                                                                                                                                                                                                                                                                                                                                                                                                                                                                                                                                                                                                                                                      |
| <b>Identifier?</b>          | N                                                                                                                                                                                                                                                                                                                                                                                                                                                                                                                                                                                                                                                                                                                                        |
| <b>Required Field?</b>      | Y                                                                                                                                                                                                                                                                                                                                                                                                                                                                                                                                                                                                                                                                                                                                        |
| <b>Field Label</b>          | <b>Patient's Primary Race</b>                                                                                                                                                                                                                                                                                                                                                                                                                                                                                                                                                                                                                                                                                                            |
| <b>REDCap Variable Name</b> | naaccr_race_code_primary                                                                                                                                                                                                                                                                                                                                                                                                                                                                                                                                                                                                                                                                                                                 |
| <b>Field Type</b>           | dropdown                                                                                                                                                                                                                                                                                                                                                                                                                                                                                                                                                                                                                                                                                                                                 |
| <b>Choice List</b>          | 1, White   2, Black   3, American Indian, Aleutian, or Eskimo (includes all indigenous populations of the Western hemisphere)   4, Chinese   5, Japanese   6, Filipino   7, Hawaiian   8, Korean   10, Vietnamese   11, Laotian   12, Hmong   13, Kampuchean (Cambodian)   14, Thai   15, Asian Indian or Pakistani, NOS (code 09 prior to Version 12)   16, Asian Indian   17, Pakistani   20, Micronesian, NOS   21, Chamorro/Chamoru   22, Guamanian, NOS   25, Polynesian, NOS   26, Tahitian   27, Samoan   28, Tongan   30, Melanesian, NOS   31, Fiji Islander   32, New Guinean   88, No further race documented   96, Other Asian, including Asian, NOS and Oriental, NOS   97, Pacific Islander, NOS   98, Other   99, Unknown |
| <b>Directives</b>           | The data for this field may be imported using the center's GENIE submission; if this does not occur, the data should be entered by the data abstractor.<br><br><b>FOR US and Canadian Centers:</b> Record the first mentioned race of the patient using the code used for the NAACCR Primary Race field for the GENIE clinical data submission, if applicable.<br><br><b>FOR European Centers:</b> Record '99, Unknown.'                                                                                                                                                                                                                                                                                                                 |
| <b>Identifier?</b>          | N                                                                                                                                                                                                                                                                                                                                                                                                                                                                                                                                                                                                                                                                                                                                        |
| <b>Required Field?</b>      | Y                                                                                                                                                                                                                                                                                                                                                                                                                                                                                                                                                                                                                                                                                                                                        |
| <b>Field Label</b>          | <b>Patient's Secondary Race</b>                                                                                                                                                                                                                                                                                                                                                                                                                                                                                                                                                                                                                                                                                                          |
| <b>REDCap Variable Name</b> | naaccr_race_code_primary                                                                                                                                                                                                                                                                                                                                                                                                                                                                                                                                                                                                                                                                                                                 |
| <b>Field Type</b>           | dropdown                                                                                                                                                                                                                                                                                                                                                                                                                                                                                                                                                                                                                                                                                                                                 |
| <b>Choice List</b>          | 1, White   2, Black   3, American Indian, Aleutian, or Eskimo (includes all indigenous populations of the Western hemisphere)   4, Chinese   5, Japanese   6, Filipino   7, Hawaiian   8, Korean   10, Vietnamese   11, Laotian   12, Hmong   13, Kampuchean (Cambodian)   14, Thai   15, Asian Indian or Pakistani, NOS (code 09 prior to Version 12)   16, Asian Indian   17, Pakistani   20, Micronesian, NOS   21, Chamorro/Chamoru   22, Guamanian, NOS   25, Polynesian, NOS   26, Tahitian   27, Samoan   28, Tongan   30, Melanesian, NOS   31, Fiji Islander   32, New Guinean   88, No further race documented   96, Other Asian, including Asian, NOS and Oriental, NOS   97, Pacific Islander, NOS   98, Other   99, Unknown |
| <b>Directives</b>           | The data for this field may be imported using the center's GENIE submission; if this does not occur, the data should be entered by the data abstractor.<br><br><b>FOR US and Canadian Centers:</b> Record the second mentioned race of the patient using the code used for the NAACCR Secondary Race field for the GENIE clinical data                                                                                                                                                                                                                                                                                                                                                                                                   |

# Data Abstraction Guide: GENIE AKT1 Breast Cancer Project

|                             |                                                                                                                                                                                                                                                                                                                                                                                                                                                                                                                                                                                                                                                                                                                                                 |
|-----------------------------|-------------------------------------------------------------------------------------------------------------------------------------------------------------------------------------------------------------------------------------------------------------------------------------------------------------------------------------------------------------------------------------------------------------------------------------------------------------------------------------------------------------------------------------------------------------------------------------------------------------------------------------------------------------------------------------------------------------------------------------------------|
|                             | <p>submission, if applicable.</p> <p>If the patient does not have a secondary race, enter 'No further race documented'.</p> <p><b>FOR European Centers:</b> Record '99, Unknown.'</p> <p>Do not leave blank.</p>                                                                                                                                                                                                                                                                                                                                                                                                                                                                                                                                |
| <b>Identifier?</b>          | N                                                                                                                                                                                                                                                                                                                                                                                                                                                                                                                                                                                                                                                                                                                                               |
| <b>Required Field?</b>      | Y                                                                                                                                                                                                                                                                                                                                                                                                                                                                                                                                                                                                                                                                                                                                               |
| <b>Field Label</b>          | <b>Patient's Tertiary Race</b>                                                                                                                                                                                                                                                                                                                                                                                                                                                                                                                                                                                                                                                                                                                  |
| <b>REDCap Variable Name</b> | naaccr_race_code_primary                                                                                                                                                                                                                                                                                                                                                                                                                                                                                                                                                                                                                                                                                                                        |
| <b>Field Type</b>           | dropdown                                                                                                                                                                                                                                                                                                                                                                                                                                                                                                                                                                                                                                                                                                                                        |
| <b>Choice List</b>          | <p>1, White   2, Black   3, American Indian, Aleutian, or Eskimo (includes all indigenous populations of the Western hemisphere)   4, Chinese   5, Japanese   6, Filipino   7, Hawaiian   8, Korean   10, Vietnamese   11, Laotian   12, Hmong   13, Kampuchean (Cambodian)   14, Thai   15, Asian Indian or Pakistani, NOS (code 09 prior to Version 12)   16, Asian Indian   17, Pakistani   20, Micronesian, NOS   21, Chamorro/Chamoru   22, Guamanian, NOS   25, Polynesian, NOS   26, Tahitian   27, Samoan   28, Tongan   30, Melanesian, NOS   31, Fiji Islander   32, New Guinean   88, No further race documented   96, Other Asian, including Asian, NOS and Oriental, NOS   97, Pacific Islander, NOS   98, Other   99, Unknown</p> |
| <b>Directives</b>           | <p>The data for this field may be imported using the center's GENIE submission; if this does not occur, the data should be entered by the data abstractor.</p> <p><b>FOR US and Canadian Centers:</b> Record the third mentioned race of the patient using the code used for the NAACCR Tertiary Race field for the GENIE clinical data submission, if applicable.</p> <p>If the patient does not have a tertiary race, enter 'No further race documented'.</p> <p><b>FOR European Centers:</b> Record '99, Unknown.'</p> <p>Do not leave blank.</p>                                                                                                                                                                                            |
| <b>Identifier?</b>          | N                                                                                                                                                                                                                                                                                                                                                                                                                                                                                                                                                                                                                                                                                                                                               |
| <b>Required Field?</b>      | Y                                                                                                                                                                                                                                                                                                                                                                                                                                                                                                                                                                                                                                                                                                                                               |
| <b>Field Label</b>          | <b>Patient's Ethnicity</b>                                                                                                                                                                                                                                                                                                                                                                                                                                                                                                                                                                                                                                                                                                                      |
| <b>REDCap Variable Name</b> | naaccr_ethnicity_code                                                                                                                                                                                                                                                                                                                                                                                                                                                                                                                                                                                                                                                                                                                           |
| <b>Field Type</b>           | dropdown                                                                                                                                                                                                                                                                                                                                                                                                                                                                                                                                                                                                                                                                                                                                        |
| <b>Choice List</b>          | <p>0, Non-Spanish; non-Hispanic   1, Mexican (includes Chicano)   2, Puerto Rican   3, Cuban   4, South or Central American (except Brazil)   5, Other specified Spanish/Hispanic origin   6, Spanish, NOS Hispanic, NOS Latino, NOS   7, Spanish surname only   8, Dominican Republic   99, Unknown whether Spanish or not</p>                                                                                                                                                                                                                                                                                                                                                                                                                 |
| <b>Directives</b>           | <p>The data for this field may be imported using the center's GENIE submission; if this does not occur, the data should be entered by the data abstractor.<b>FOR US and Canadian Centers:</b> Record the ethnicity of the patient using the code used for the NAACCR Ethnicity field for the GENIE clinical data submission, if applicable.</p>                                                                                                                                                                                                                                                                                                                                                                                                 |

# Data Abstraction Guide: GENIE AKT1 Breast Cancer Project

|                      |                                                                                                                                                                                                                                                                                                                                                                                                                                                                                                                                                                                                                                                                                                                                               |
|----------------------|-----------------------------------------------------------------------------------------------------------------------------------------------------------------------------------------------------------------------------------------------------------------------------------------------------------------------------------------------------------------------------------------------------------------------------------------------------------------------------------------------------------------------------------------------------------------------------------------------------------------------------------------------------------------------------------------------------------------------------------------------|
|                      | <p><b>FOR European Centers:</b> Record '99, Unknown whether Spanish or not.'</p> <p>Do not leave blank.</p>                                                                                                                                                                                                                                                                                                                                                                                                                                                                                                                                                                                                                                   |
| Identifier?          | N                                                                                                                                                                                                                                                                                                                                                                                                                                                                                                                                                                                                                                                                                                                                             |
| Required Field?      | Y                                                                                                                                                                                                                                                                                                                                                                                                                                                                                                                                                                                                                                                                                                                                             |
| <b>Field Label</b>   | <b>Patient's Vital Status</b>                                                                                                                                                                                                                                                                                                                                                                                                                                                                                                                                                                                                                                                                                                                 |
| REDCap Variable Name | vital_status                                                                                                                                                                                                                                                                                                                                                                                                                                                                                                                                                                                                                                                                                                                                  |
| Field Type           | dropdown                                                                                                                                                                                                                                                                                                                                                                                                                                                                                                                                                                                                                                                                                                                                      |
| Choice List          | 1, Alive   2, Dead                                                                                                                                                                                                                                                                                                                                                                                                                                                                                                                                                                                                                                                                                                                            |
| Directives           | <p>At the time of data entry, record whether the patient is '1, Alive' or '2, Dead.'</p> <p>If you cannot find a definitive death date or indication that the patient has died, record '1, Alive,' and record the date that the patient was last know to be alive in <b><i>Date of Last Follow-up</i></b>.</p>                                                                                                                                                                                                                                                                                                                                                                                                                                |
| Identifier?          | N                                                                                                                                                                                                                                                                                                                                                                                                                                                                                                                                                                                                                                                                                                                                             |
| Required Field?      | Y                                                                                                                                                                                                                                                                                                                                                                                                                                                                                                                                                                                                                                                                                                                                             |
| <b>Field Label</b>   | <b>Patient's Date of Death</b>                                                                                                                                                                                                                                                                                                                                                                                                                                                                                                                                                                                                                                                                                                                |
| REDCap Variable Name | death_date                                                                                                                                                                                                                                                                                                                                                                                                                                                                                                                                                                                                                                                                                                                                    |
| Field Type           | text                                                                                                                                                                                                                                                                                                                                                                                                                                                                                                                                                                                                                                                                                                                                          |
| Valid Field          | mm-dd-yyyy                                                                                                                                                                                                                                                                                                                                                                                                                                                                                                                                                                                                                                                                                                                                    |
| Directives           | <p>Linked to <b><i>Vital Status</i></b>.</p> <p>If '2, Dead' is recorded in <b><i>Vital Status</i></b>, record the date that the patient died, using the following convention: mm-dd-yyyy. Please note that all components of the date must be entered.</p> <p>If the full date is not known, estimate the date on using the components that are known.</p> <ul style="list-style-type: none"> <li>• If month and year of the date is known, and the day of the month is not known, record 15 for the day.</li> <li>• If year of the date is known, and the day and month is not known, record 6 (June) for the month and 15 for the day.</li> </ul> <p>If '1, Alive' is recorded for <b><i>Vital Status</i></b>, leave this field blank.</p> |
| Identifier?          | Y; this data element will not be shared with MSK. It will be used to calculate the interval in days.                                                                                                                                                                                                                                                                                                                                                                                                                                                                                                                                                                                                                                          |
| Required Field?      | N                                                                                                                                                                                                                                                                                                                                                                                                                                                                                                                                                                                                                                                                                                                                             |
| <b>Field Label</b>   | <b>Patient's Date of Death Interval, in Days - Automated</b>                                                                                                                                                                                                                                                                                                                                                                                                                                                                                                                                                                                                                                                                                  |
| REDCap Variable Name | death_date_int                                                                                                                                                                                                                                                                                                                                                                                                                                                                                                                                                                                                                                                                                                                                |
| Field Type           | Calculated: datediff([dob_date],[death_date],'d', 'mdy', false)                                                                                                                                                                                                                                                                                                                                                                                                                                                                                                                                                                                                                                                                               |
| Directives           | <p>Dependent upon <b><i>Date of Death</i></b>.</p> <p>If the <b><i>Date of Death</i></b> was entered, REDCap will calculate this field using the <b><i>Date of</i></b></p>                                                                                                                                                                                                                                                                                                                                                                                                                                                                                                                                                                    |

# Data Abstraction Guide: GENIE AKT1 Breast Cancer Project

|                      |                                                                                                                                                                                                                                                                                   |
|----------------------|-----------------------------------------------------------------------------------------------------------------------------------------------------------------------------------------------------------------------------------------------------------------------------------|
|                      | <p><b>Birth.</b></p> <p>If the <b>Date of Death</b> was not entered, this data field will remain blank.</p>                                                                                                                                                                       |
| Identifier?          | N                                                                                                                                                                                                                                                                                 |
| Required Field?      | N                                                                                                                                                                                                                                                                                 |
| Field Label          | <b>Patient's Date of Last Follow-up</b>                                                                                                                                                                                                                                           |
| REDCap Variable Name | follow_up_date                                                                                                                                                                                                                                                                    |
| Field Type           | text                                                                                                                                                                                                                                                                              |
| Valid Field          | mm-dd-yyyy                                                                                                                                                                                                                                                                        |
|                      | <p>Dependent upon <b>Vital Status</b>.</p> <p>If '1, Alive' is recorded in Vital Status, record the date that the patient is last known to be alive. Use any data available to find this date, including: clinic notes, lab tests, procedure dates, or hospitalization dates.</p> |
| Directives           | This date should not be approximated.                                                                                                                                                                                                                                             |
| Identifier?          | Y; this data element will not be shared with MSK. It will be used to calculate the interval in days.                                                                                                                                                                              |
| Required Field?      | N                                                                                                                                                                                                                                                                                 |
| Field Label          | <b>Patient's Follow-up Date Interval, in Days - Automated</b>                                                                                                                                                                                                                     |
| REDCap Variable Name | follow_up_date_int                                                                                                                                                                                                                                                                |
| Field Type           | Calculated: datediff([dob_date],[follow_up_date],'d', 'mdy', false)                                                                                                                                                                                                               |
|                      | <p>Dependent upon <b>Follow-up Date</b>.</p> <p>If the <b>Follow-up Date</b> was entered, REDCap will calculate this field by subtracting the <b>Date of Birth</b> from the <b>Follow-up Date</b>.</p>                                                                            |
| Directives           | If the <b>Follow-up Date</b> was not entered, this data field will remain blank.                                                                                                                                                                                                  |
| Identifier?          | N                                                                                                                                                                                                                                                                                 |
| Required Field?      | N                                                                                                                                                                                                                                                                                 |
| Field Label          | <b>Form Status: Complete?</b>                                                                                                                                                                                                                                                     |
| REDCap Variable Name |                                                                                                                                                                                                                                                                                   |
| Field Type           | Dropdown                                                                                                                                                                                                                                                                          |
| Choice List          | Incomplete   Unverified   Complete                                                                                                                                                                                                                                                |
|                      | <p>Record 'Complete' once all of the data fields in this section have been entered and the eligibility calculation has been performed. This field will be used during data quality review.</p>                                                                                    |
| Directives           | 'Incomplete' is the default choice; patients with any indication of 'Incomplete' or 'Unverified' sections are not eligible for data analysis.                                                                                                                                     |
| Identifier?          | N                                                                                                                                                                                                                                                                                 |
| Required Field?      | N                                                                                                                                                                                                                                                                                 |



# Data Abstraction Guide: GENIE AKT1 Breast Cancer Project

---

## DIAGNOSIS INFORMATION SECTION

### General Abstracting Notes:

1. In order to record data in this section, the patient must be eligible for the study; meaning, the patient has passed the calculated eligibility field found in the Eligibility section.
2. This section is divided into three subsections: Primary Diagnosis, Local/Regional Recurrence, and Distant Metastasis. Each section will be presented separately.
3. The best place to find the data for this section is the relevant pathology notes.

### Primary Diagnosis of Breast Cancer Sub-Section

#### Abstracting Notes:

1. In this section, enter data pertaining to the primary breast cancer diagnosis that resulted in the metastatic site.
2. For patients with multiple breast cancer diagnoses, enter data only on the primary cancer diagnosis thought to be associated with the metastatic disease. If you have a question about which breast cancer diagnosis is appropriate, consult with your Site PI.

# Data Abstraction Guide: GENIE AKT1 Breast Cancer Project

**Diagnosis Information** Re-assign this record to another Data Access Group?

Editing existing Record ID 1 - 1a

Record ID

Primary Diagnosis (for patients with multiple breast primaries, centers will use the primary believed to have resulted in metastatic disease):

**FURTHER DIRECTIONS:**

- IF APPROXIMATED BY MONTH, USE FIRST OF THE MONTH AS DEFAULT.

**Date of Primary Diagnosis**  Today M-D-Y  
\* must provide value  
PLEASE ENTER DATE IN MM - DD - YYYY FORMAT!

**Date of Primary Diagnosis Interval**  View equation

**Tumor Type [Onco-Tree Code]**

- Adenoid Cystic Breast Cancer (ACBC)
- Breast Carcinoma with Signet Ring (BRSRCC)
- Breast Invasive Cancer, NOS (BRCANOS)
- Breast Invasive Carcinosarcoma, NOS (CSNOS)
- Breast Invasive Ductal Carcinoma (IDC)
- Breast Invasive Lobular Carcinoma (ILC)
- Breast Mixed Ductal and Lobular Carcinoma (MDLC)
- Breast Invasive Mixed Mucinous Carcinoma (IMMC)
- Solid Papillary Carcinoma of the Breast (SPC)

reset

**AJCC Stage (Version 7) at primary diagnosis:**   
\* must provide value

**Overall Tumor Grade:**

**LVI**

**PR status**   
POSITIVE = (>1%)

**ER Status**   
POSITIVE = (>1%)

**HER2 Status**   
POSITIVE= (IHC 3+ /FISH>2)

| Field Label                 | Date of Primary Diagnosis                                                                                                                                                                                                                                                                                                                                                                     |
|-----------------------------|-----------------------------------------------------------------------------------------------------------------------------------------------------------------------------------------------------------------------------------------------------------------------------------------------------------------------------------------------------------------------------------------------|
| <b>REDCap Variable Name</b> | primary_dx_date                                                                                                                                                                                                                                                                                                                                                                               |
| <b>Field Type</b>           | Primary Diagnosis (for patients with multiple breast primaries, use the breast cancer primary believed to have resulted in metastatic disease)                                                                                                                                                                                                                                                |
| <b>Valid Field</b>          | mm-dd-yyyy                                                                                                                                                                                                                                                                                                                                                                                    |
| <b>Directives</b>           | <p>Record the date of diagnosis for the breast cancer. The date of diagnosis should correspond to the first indication of invasive cancer based on pathology.</p> <p>If the full date is not known, estimate the date on using the components that are known.</p> <ul style="list-style-type: none"> <li>• If month and year of the date is known, and the day of the month is not</li> </ul> |

# Data Abstraction Guide: GENIE AKT1 Breast Cancer Project

|                             |                                                                                                                                                                                                                                                                                                                                                                                                                                                                                                                                                    |
|-----------------------------|----------------------------------------------------------------------------------------------------------------------------------------------------------------------------------------------------------------------------------------------------------------------------------------------------------------------------------------------------------------------------------------------------------------------------------------------------------------------------------------------------------------------------------------------------|
|                             | <p>known, record 15 for the day.</p> <ul style="list-style-type: none"> <li>• If year of the date is known, and the day and month is not known, record 6 (June) for the month and 15 for the day.</li> <li>• If the year is known, and the seasons are noted rather than the month and day, use the following: <ul style="list-style-type: none"> <li>○ For winter use January (1)</li> <li>○ For spring use April (4)</li> <li>○ For summer use July (7)</li> <li>○ For autumn use October (10)</li> </ul> </li> </ul> <p>Do not leave blank.</p> |
| <b>Identifier?</b>          | Y; this data element will not be shared with MSK. It will be used to calculate the interval in days.                                                                                                                                                                                                                                                                                                                                                                                                                                               |
| <b>Required Field?</b>      | Y                                                                                                                                                                                                                                                                                                                                                                                                                                                                                                                                                  |
| <b>Field Label</b>          | <b>Date of Primary Diagnosis Interval, in Days - Automated</b>                                                                                                                                                                                                                                                                                                                                                                                                                                                                                     |
| <b>REDCap Variable Name</b> | primary_dx_date_int                                                                                                                                                                                                                                                                                                                                                                                                                                                                                                                                |
| <b>Field Type</b>           | Calculated: datediff([dob_date],[primary_dx_date],'d', 'mdy', false)                                                                                                                                                                                                                                                                                                                                                                                                                                                                               |
|                             | Dependent upon <b><i>Date of Primary Diagnosis</i></b> .                                                                                                                                                                                                                                                                                                                                                                                                                                                                                           |
|                             | If the <b><i>Date of Primary Diagnosis</i></b> was entered, REDCap will calculate this field by subtracting the <b><i>Date of Birth</i></b> from the <b><i>Date of Primary Diagnosis</i></b> .                                                                                                                                                                                                                                                                                                                                                     |
| <b>Directives</b>           | Since <b><i>Date of Primary Diagnosis</i></b> is required, this data field will be filled.                                                                                                                                                                                                                                                                                                                                                                                                                                                         |
| <b>Identifier?</b>          | N                                                                                                                                                                                                                                                                                                                                                                                                                                                                                                                                                  |
| <b>Required Field?</b>      | N                                                                                                                                                                                                                                                                                                                                                                                                                                                                                                                                                  |
| <b>Field Label</b>          | <b>Tumor Type [Onco-Tree Code]</b>                                                                                                                                                                                                                                                                                                                                                                                                                                                                                                                 |
| <b>REDCap Variable Name</b> | oncotree_code                                                                                                                                                                                                                                                                                                                                                                                                                                                                                                                                      |
| <b>Field Type</b>           | radio                                                                                                                                                                                                                                                                                                                                                                                                                                                                                                                                              |
| <b>Choice List</b>          | ACBC, Adenoid Cystic Breast Cancer (ACBC)   BRSRCC, Breast Carcinoma with Signet Ring (BRSRCC)   BRCANOS, Breast Invasive Cancer, NOS (BRCANOS)   CSNOS, Breast Invasive Carcinosarcoma, NOS (CSNOS)   IDC, Breast Invasive Ductal Carcinoma (IDC)   ILC, Breast Invasive Lobular Carcinoma (ILC)   MDLC, Breast Mixed Ductal and Lobular Carcinoma (MDLC)   IMMC, Breast Invasive Mixed Mucinous Carcinoma (IMMC)   SPC, Solid Papillary Carcinoma of the Breast (SPC)                                                                            |
|                             | Record the OncoTree cancer type associated with the sequenced breast cancer specimen submitted to GENIE.                                                                                                                                                                                                                                                                                                                                                                                                                                           |
|                             | Only one <b><i>Tumor Type</i></b> can be entered.                                                                                                                                                                                                                                                                                                                                                                                                                                                                                                  |
| <b>Directives</b>           | Do not leave blank.                                                                                                                                                                                                                                                                                                                                                                                                                                                                                                                                |
| <b>Identifier?</b>          | N                                                                                                                                                                                                                                                                                                                                                                                                                                                                                                                                                  |
| <b>Required Field?</b>      | N                                                                                                                                                                                                                                                                                                                                                                                                                                                                                                                                                  |



# Data Abstraction Guide: GENIE AKT1 Breast Cancer Project

|                             |                                                                                                                                                                                                                                                                                              |
|-----------------------------|----------------------------------------------------------------------------------------------------------------------------------------------------------------------------------------------------------------------------------------------------------------------------------------------|
| <b>Field Label</b>          | <b>AJCC Stage (Version 7) at Primary Diagnosis</b>                                                                                                                                                                                                                                           |
| <b>REDCap Variable Name</b> | ajcc_stage                                                                                                                                                                                                                                                                                   |
| <b>Field Type</b>           | dropdown                                                                                                                                                                                                                                                                                     |
| <b>Choice List</b>          | 0, 0   1, 1   2, 2   3, 3   4, 4   99, UNK                                                                                                                                                                                                                                                   |
| <b>Directives</b>           | Record the stage of the breast cancer using the 7th edition of AJCC; see Appendix One for more details. If more detail is known, record the more general code; for example, if Stage IIB is recorded in the EMR, record '2.'                                                                 |
| <b>Identifier?</b>          | N                                                                                                                                                                                                                                                                                            |
| <b>Required Field?</b>      | Y                                                                                                                                                                                                                                                                                            |
| <b>Field Label</b>          | <b>Overall Tumor Grade</b>                                                                                                                                                                                                                                                                   |
| <b>REDCap Variable Name</b> | grade                                                                                                                                                                                                                                                                                        |
| <b>Field Type</b>           | dropdown                                                                                                                                                                                                                                                                                     |
| <b>Choice List</b>          | 1, 1   2, 2   3, 3   99, UNK                                                                                                                                                                                                                                                                 |
| <b>Directives</b>           | Record the tumor grade. This information is usually found on the pathology report for either a biopsy or the definitive surgery of the primary tumor.<br><br>If the grade is not found, record '99,UNK.'                                                                                     |
| <b>Identifier?</b>          | N                                                                                                                                                                                                                                                                                            |
| <b>Required Field?</b>      | N                                                                                                                                                                                                                                                                                            |
| <b>Field Label</b>          | <b>Lymphovascular Invasion – LVI</b>                                                                                                                                                                                                                                                         |
| <b>REDCap Variable Name</b> | lvi                                                                                                                                                                                                                                                                                          |
| <b>Field Type</b>           | dropdown                                                                                                                                                                                                                                                                                     |
| <b>Choice List</b>          | 1, Present   0, Absent   99, UNK                                                                                                                                                                                                                                                             |
| <b>Directives</b>           | Record '1, Present' if the primary breast tumor is noted in the pathology report to have LVI.<br><br>If the pathology reports are not available, but the treating physician records that the breast cancer is LVI positive record '1, Present.'<br><br>If LVI is not noted, record '99,UNK.' |
| <b>Identifier?</b>          | N                                                                                                                                                                                                                                                                                            |
| <b>Required Field?</b>      | N                                                                                                                                                                                                                                                                                            |
| <b>Field Label</b>          | <b>Progesterone Receptor – PR status</b>                                                                                                                                                                                                                                                     |
| <b>REDCap Variable Name</b> | pr_status                                                                                                                                                                                                                                                                                    |
| <b>Field Type</b>           | dropdown                                                                                                                                                                                                                                                                                     |
| <b>Choice List</b>          | 1, Positive   0, Negative   99, UNK                                                                                                                                                                                                                                                          |

# Data Abstraction Guide: GENIE AKT1 Breast Cancer Project

|                             |                                                                                                                                                                                                                                                                                                                                                                                                                                                                                                                                                                           |
|-----------------------------|---------------------------------------------------------------------------------------------------------------------------------------------------------------------------------------------------------------------------------------------------------------------------------------------------------------------------------------------------------------------------------------------------------------------------------------------------------------------------------------------------------------------------------------------------------------------------|
|                             | <p>Record '1, Positive' if the primary breast tumor is noted in the pathology report to be positive for progesterone receptors. If the PR status is reported as a percentage greater than 1%, record '1, Positive.'</p> <p>If PR status in the pathology report is reported as negative or as less than or equal to 1%, record '2, Negative.'</p> <p>If the pathology reports for the biopsy and/or surgery are not available, but the treating physician records that the breast cancer is progesterone receptor positive record '1, Positive.'</p>                      |
| <b>Directives</b>           | If PR status of the primary tumor is not noted, record '99, UNK.'                                                                                                                                                                                                                                                                                                                                                                                                                                                                                                         |
| <b>Identifier?</b>          | N                                                                                                                                                                                                                                                                                                                                                                                                                                                                                                                                                                         |
| <b>Required Field?</b>      | N                                                                                                                                                                                                                                                                                                                                                                                                                                                                                                                                                                         |
| <b>Field Label</b>          | <b>Estrogen Receptor – ER status</b>                                                                                                                                                                                                                                                                                                                                                                                                                                                                                                                                      |
| <b>REDCap Variable Name</b> | er_status                                                                                                                                                                                                                                                                                                                                                                                                                                                                                                                                                                 |
| <b>Field Type</b>           | Dropdown                                                                                                                                                                                                                                                                                                                                                                                                                                                                                                                                                                  |
| <b>Choice List</b>          | 1, Positive   0, Negative   99, UNK                                                                                                                                                                                                                                                                                                                                                                                                                                                                                                                                       |
|                             | <p>Record "1, Positive" if the primary breast tumor is noted in the pathology report to be positive for estrogen receptors. If the ER status is reported as a percentage greater than 1%, record '1, Positive.'</p> <p>If ER status in the pathology report is reported as negative or as less than or equal to 1%, record '2, Negative.'</p> <p>If the pathology reports for the biopsy and/or surgery of the primary breast cancer are not available, but the treating physician records that the breast cancer is estrogen receptor positive record '1, Positive.'</p> |
| <b>Directives</b>           | If ER status of the primary tumor is not noted, record '99, UNK.'                                                                                                                                                                                                                                                                                                                                                                                                                                                                                                         |
| <b>Identifier?</b>          | N                                                                                                                                                                                                                                                                                                                                                                                                                                                                                                                                                                         |
| <b>Required Field?</b>      | N                                                                                                                                                                                                                                                                                                                                                                                                                                                                                                                                                                         |
| <b>Field Label</b>          | <b>HER2 Status</b>                                                                                                                                                                                                                                                                                                                                                                                                                                                                                                                                                        |
| <b>REDCap Variable Name</b> | her2_status                                                                                                                                                                                                                                                                                                                                                                                                                                                                                                                                                               |
| <b>Field Type</b>           | Dropdown                                                                                                                                                                                                                                                                                                                                                                                                                                                                                                                                                                  |
| <b>Choice List</b>          | 1, Positive   0, Negative   2, Equivocal   99, UNK                                                                                                                                                                                                                                                                                                                                                                                                                                                                                                                        |
| <b>Directives</b>           | <p>Record '1, Positive' if the primary breast tumor is noted in the pathology report to be positive for HER2 by IHC at 3+ or FISH&gt;2.</p> <p>If the HER2 is reported by IHC at 2+ and FISH was either not done or was done but reported as Equivocal record '2, Equivocal;'</p> <p>Anything else is "0, Negative", for e.g HER2 IHC 2+ but FISH is non-amplified</p>                                                                                                                                                                                                    |

# Data Abstraction Guide: GENIE AKT1 Breast Cancer Project

|                      |                                                                                                                                                                                                                                                                                                                                                             |
|----------------------|-------------------------------------------------------------------------------------------------------------------------------------------------------------------------------------------------------------------------------------------------------------------------------------------------------------------------------------------------------------|
|                      | <p>If the pathology reports for the biopsy and/or surgery are not available, but the treating physician records that the breast cancer is HER2 positive record '1, Positive.'</p> <p>If HER2 status of the primary tumor is not noted in the pathology report or by physician report, record '99, UNK.'</p>                                                 |
| Identifier?          | N                                                                                                                                                                                                                                                                                                                                                           |
| Required Field?      | N                                                                                                                                                                                                                                                                                                                                                           |
| Field Label          | <b>Is the Oncotype DX Score Known?</b>                                                                                                                                                                                                                                                                                                                      |
| REDCap Variable Name | oncotype_known                                                                                                                                                                                                                                                                                                                                              |
| Field Type           | yesno                                                                                                                                                                                                                                                                                                                                                       |
| Choice List          | Yes   No                                                                                                                                                                                                                                                                                                                                                    |
| Directives           | <p>If the Oncotype DX score is recorded in the EMR, record 'Yes.'</p> <p>If the patient's chart has no mention of Oncotype DX, record 'No.'</p> <p>If the patient has had Oncotype DX, but the score is not recorded,</p> <p>If the patient did not have Oncotype DX, record 'No.'</p>                                                                      |
| Identifier?          | N                                                                                                                                                                                                                                                                                                                                                           |
| Required Field?      | Y                                                                                                                                                                                                                                                                                                                                                           |
| Field Label          | <b>Oncotype DX Score</b>                                                                                                                                                                                                                                                                                                                                    |
| REDCap Variable Name | oncotype_score                                                                                                                                                                                                                                                                                                                                              |
| Field Type           | text                                                                                                                                                                                                                                                                                                                                                        |
| Valid Entry          | 0 – 100 (integer)                                                                                                                                                                                                                                                                                                                                           |
| Directives           | <p>Linked to <b><i>Is the Oncotype DX Score Known?</i></b></p> <p>If 'Yes' is recorded for <b><i>Is the Oncotype DX Score Known?</i></b>, record the Oncotype DX Score; the value of which should be a integer from 0 to 100.</p> <p>If 'No' is recorded for <b><i>Is the Oncotype DX Score Known?</i></b> leave <b><i>Oncotype DX Score</i></b> blank.</p> |
| Identifier?          | N                                                                                                                                                                                                                                                                                                                                                           |
| Required Field?      | N                                                                                                                                                                                                                                                                                                                                                           |

# Data Abstraction Guide: GENIE AKT1 Breast Cancer Project

## Loco-regional Recurrence (LRR) Sub-Section

### Abstracting Notes:

1. The definition of a loco-regional recurrence for the AKT1 project includes: any recurrence of breast cancer in the one or more of the following:
  - Ipsilateral chest wall
  - Mastectomy scars
  - Ipsilateral supraclavicular
  - Infraclavicular nodes
  - Axillary nodes
  - Internal mammary nodes
2. This section is intended to provide detail on patients before the development of distant metastases.
  - For patients with primary diagnoses of Stage I – III breast cancer, a LRR (if it occurs at all) should occur prior to the development of a distant metastasis to enter data. If the LRR occurs after a distant metastasis, record '0, No' to the first question.
  - For patients diagnosed with Stage IV breast cancer, record '0, No' to the first question.
3. If patient has had multiple LRRs outside the setting of distant metastases, please enter information for the first recurrence below. Information on subsequent loco-regional recurrences should not be entered into this database.

**Loco-regional Recurrence (LRR)**

If patient has had multiple LRRs, please enter information for the first recurrence below.

**FURTHER DIRECTIONS:**

- IF APPROXIMATED BY MONTH, USE FIRST OF THE MONTH AS DEFAULT.
- IF DRUG HAS NOT BEEN DISCONTINUED, ENTER DATE THE DRUG WAS LAST ADMINISTERED.
- IF A PATIENT HAS HAD A "TREATMENT BREAK" - WHEREBY THEY START, STOP (FOR <=3 MONTHS) AND THEN RE-START THE SAME DRUG, ONLY RECORD START AND FINAL STOP DATE FOR THAT DRUG.
- IF MULTIPLE REASONS EXIST FOR DRUG DISCONTINUATION, POD TAKES PRECEDENCE

Was there any recurrence of tumor in the ipsilateral chest wall or in mastectomy scars, in the ipsilateral supraclavicular, infraclavicular, axillary, or internal mammary nodes?

Date of LRR  Today M-D-Y  
PLEASE ENTER DATE IN MM - DD - YYYY FORMAT!

LRR Date Interval  View equation

Site of LRR  
 Local only  
 Regional Lymph Nodes only  
 Local and Regional Lymph Nodes

reset

|             |                                                                                  |
|-------------|----------------------------------------------------------------------------------|
| Field Label | Was there any recurrence of tumor in the ipsilateral chest wall or in mastectomy |
|-------------|----------------------------------------------------------------------------------|

# Data Abstraction Guide: GENIE AKT1 Breast Cancer Project

|                             |                                                                                                                                                                                                                                                                                                                                                                                                                                                                                                                                                                                                                                                                                                                                                                                                                                                                                                                                                                                                                                                                                                                                                                                                                         |
|-----------------------------|-------------------------------------------------------------------------------------------------------------------------------------------------------------------------------------------------------------------------------------------------------------------------------------------------------------------------------------------------------------------------------------------------------------------------------------------------------------------------------------------------------------------------------------------------------------------------------------------------------------------------------------------------------------------------------------------------------------------------------------------------------------------------------------------------------------------------------------------------------------------------------------------------------------------------------------------------------------------------------------------------------------------------------------------------------------------------------------------------------------------------------------------------------------------------------------------------------------------------|
|                             | <b>scars, in the ipsilateral supraclavicular, infraclavicular, axillary, or internal mammary nodes?</b>                                                                                                                                                                                                                                                                                                                                                                                                                                                                                                                                                                                                                                                                                                                                                                                                                                                                                                                                                                                                                                                                                                                 |
| <b>REDCap Variable Name</b> | lrr_yn                                                                                                                                                                                                                                                                                                                                                                                                                                                                                                                                                                                                                                                                                                                                                                                                                                                                                                                                                                                                                                                                                                                                                                                                                  |
| <b>Field Type</b>           | dropdown                                                                                                                                                                                                                                                                                                                                                                                                                                                                                                                                                                                                                                                                                                                                                                                                                                                                                                                                                                                                                                                                                                                                                                                                                |
| <b>Choice List</b>          | 1, Yes   0, No   99, UNK                                                                                                                                                                                                                                                                                                                                                                                                                                                                                                                                                                                                                                                                                                                                                                                                                                                                                                                                                                                                                                                                                                                                                                                                |
| <b>Directives</b>           | <p>If the patient has experienced a recurrence of breast cancer that occurs after the primary diagnosis period but before the diagnosis of distant metastasis, record '1, Yes.'</p> <p>If the patient has not experienced a loco-regional recurrence of breast cancer after the primary diagnosis period but before the diagnosis of distant metastasis, record '2, No.'</p> <p>If the patient's primary breast cancer was diagnosed as Stage IV, record '2, No.'</p> <p>Do not leave blank.</p>                                                                                                                                                                                                                                                                                                                                                                                                                                                                                                                                                                                                                                                                                                                        |
| <b>Identifier?</b>          | N                                                                                                                                                                                                                                                                                                                                                                                                                                                                                                                                                                                                                                                                                                                                                                                                                                                                                                                                                                                                                                                                                                                                                                                                                       |
| <b>Required Field?</b>      | Y                                                                                                                                                                                                                                                                                                                                                                                                                                                                                                                                                                                                                                                                                                                                                                                                                                                                                                                                                                                                                                                                                                                                                                                                                       |
| <b>Field Label</b>          | <b>Date of LRR</b>                                                                                                                                                                                                                                                                                                                                                                                                                                                                                                                                                                                                                                                                                                                                                                                                                                                                                                                                                                                                                                                                                                                                                                                                      |
| <b>REDCap Variable Name</b> | lrr_date                                                                                                                                                                                                                                                                                                                                                                                                                                                                                                                                                                                                                                                                                                                                                                                                                                                                                                                                                                                                                                                                                                                                                                                                                |
| <b>Field Type</b>           | text                                                                                                                                                                                                                                                                                                                                                                                                                                                                                                                                                                                                                                                                                                                                                                                                                                                                                                                                                                                                                                                                                                                                                                                                                    |
| <b>Valid Field</b>          | mm-dd-yyyy                                                                                                                                                                                                                                                                                                                                                                                                                                                                                                                                                                                                                                                                                                                                                                                                                                                                                                                                                                                                                                                                                                                                                                                                              |
| <b>Directives</b>           | <p>Linked to <b><i>Was there any recurrence of tumor in the ipsilateral chest wall or in mastectomy scars, in the ipsilateral supraclavicular, infraclavicular, axillary, or internal mammary nodes?</i></b></p> <p>If '1, Yes' was recorded to the LRR question, complete.<br/>Record the first date of loco-regional recurrence for the breast cancer. The date of loco-regional recurrence should correspond to the first indication of recurrence based on either imaging or pathology results.</p> <p>If the full date is not known, estimate the date on using the components that are known.</p> <ul style="list-style-type: none"> <li>• If month and year of the date is known, and the day of the month is not known, record 15 for the day.</li> <li>• If year of the date is known, and the day and month is not known, record 6 (June) for the month and 15 for the day.</li> <li>• If the year is known, and the seasons are noted rather than the month and day, use the following:             <ul style="list-style-type: none"> <li>○ For winter use January (1)</li> <li>○ For spring use April (4)</li> <li>○ For summer use July (7)</li> <li>○ For autumn use October (10)</li> </ul> </li> </ul> |

## Data Abstraction Guide: GENIE AKT1 Breast Cancer Project

|                             |                                                                                                                                                                                                                                                                                                                                                                             |
|-----------------------------|-----------------------------------------------------------------------------------------------------------------------------------------------------------------------------------------------------------------------------------------------------------------------------------------------------------------------------------------------------------------------------|
|                             | If '0, No' was recorded to the LRR question, leave blank.                                                                                                                                                                                                                                                                                                                   |
| <b>Identifier?</b>          | Y; this data element will not be shared with MSK. It will be used to calculate the interval in days.                                                                                                                                                                                                                                                                        |
| <b>Required Field?</b>      | N                                                                                                                                                                                                                                                                                                                                                                           |
| <b>Field Label</b>          | <b>LRR Date Interval, in Days - Automated</b>                                                                                                                                                                                                                                                                                                                               |
| <b>REDCap Variable Name</b> | lrr_date_int                                                                                                                                                                                                                                                                                                                                                                |
| <b>Field Type</b>           | Calculated: datediff([dob_date],[lrr_date],'d', 'mdy', false)                                                                                                                                                                                                                                                                                                               |
| <b>Directives</b>           | <p>Dependent upon <b>LRR Date</b>.</p> <p>If the <b>Follow-up Date</b> was entered, REDCap will calculate this field by subtracting the <b>Date of Birth</b> from the <b>LRR Date</b>.</p> <p>If the <b>LRR Date</b> was not entered, this data field will remain blank.</p>                                                                                                |
| <b>Identifier?</b>          | N                                                                                                                                                                                                                                                                                                                                                                           |
| <b>Required Field?</b>      | N                                                                                                                                                                                                                                                                                                                                                                           |
| <b>Field Label</b>          | <b>Site of LRR</b>                                                                                                                                                                                                                                                                                                                                                          |
| <b>REDCap Variable Name</b> | lrr_site                                                                                                                                                                                                                                                                                                                                                                    |
| <b>Field Type</b>           | radio                                                                                                                                                                                                                                                                                                                                                                       |
| <b>Choice List</b>          | 1, Local only   2, Regional Lymph Nodes only   3, Local and Regional Lymph Nodes                                                                                                                                                                                                                                                                                            |
| <b>Directives</b>           | <p>Linked to <b>Was there any recurrence of tumor in the ipsilateral chest wall or in mastectomy scars, in the ipsilateral supraclavicular, infraclavicular, axillary, or internal mammary nodes?</b></p> <p>If '1, Yes' was recorded to the LRR question, complete.<br/>Record the first site of LRR.</p> <p>If '0, No' was recorded to the LRR question, leave blank.</p> |
| <b>Identifier?</b>          | N                                                                                                                                                                                                                                                                                                                                                                           |
| <b>Required Field?</b>      | N                                                                                                                                                                                                                                                                                                                                                                           |

# Data Abstraction Guide: GENIE AKT1 Breast Cancer Project

---

## Distant Metastatic Diagnosis (de novo or relapsed) Sub-Section

### Abstracting Notes:

1. Use this section to record data concerning the first distant metastases. If sites are identified at the same time or within the 30 days, count them as the first distant sites.
2. Use imaging reports like CT scans or MRIs and medical oncology provider notes to identify the first distant metastatic sites. Defer to the medical oncologist's clinical assessment for an indication of metastasis.
3. Some usual sites of distant metastases for breast cancer include: bone, liver, lung, and brain.
  - If the patient's primary breast cancer diagnosis is Stage IV, record the distant metastases that were present at diagnosis.
  - If the patient's primary breast cancer diagnosis is Stage I-III, record the first distant metastases occurring after the primary diagnosis timeframe.
4. If you have any questions or concerns about the identification of distant metastases, please contact the Center PI.

# Data Abstraction Guide: GENIE AKT1 Breast Cancer Project

Date of radiologically confirmed Distant Metastatic Disease  Today M-D-Y  
PLEASE ENTER DATE IN MM - DD - YYYY FORMAT!

Distant Metastatic Disease Interval  [View equation](#)

Was a biopsy performed of metastatic site?  Yes  No reset

Did the ER/PR/HER2 status differ (positive to negative or vice versa) from primary tumor?  Yes  No reset

PR status:  POSITIVE = (>1%)

ER Status  POSITIVE = (>1%)

HER2 Status  POSITIVE= (IHC 3+ / FISH > 2)

**Site of First Distant Metastatic Disease**

|             | Yes                   | No                               | Unknown               |       |
|-------------|-----------------------|----------------------------------|-----------------------|-------|
| Bone        | <input type="radio"/> | <input type="radio"/>            | <input type="radio"/> | reset |
| Liver       | <input type="radio"/> | <input type="radio"/>            | <input type="radio"/> | reset |
| Lung        | <input type="radio"/> | <input type="radio"/>            | <input type="radio"/> | reset |
| Brain       | <input type="radio"/> | <input type="radio"/>            | <input type="radio"/> | reset |
| Lymph Node  | <input type="radio"/> | <input type="radio"/>            | <input type="radio"/> | reset |
| Soft Tissue | <input type="radio"/> | <input type="radio"/>            | <input type="radio"/> | reset |
| Other       | <input type="radio"/> | <input checked="" type="radio"/> | <input type="radio"/> | reset |

| Field Label          | Date of Radiologically Confirmed Distant Metastatic Disease                                                                                                                                                                                                                                                                                                                                                                                                                                           |
|----------------------|-------------------------------------------------------------------------------------------------------------------------------------------------------------------------------------------------------------------------------------------------------------------------------------------------------------------------------------------------------------------------------------------------------------------------------------------------------------------------------------------------------|
| REDCap Variable Name | distant_mets_disease_date                                                                                                                                                                                                                                                                                                                                                                                                                                                                             |
| Field Type           | text                                                                                                                                                                                                                                                                                                                                                                                                                                                                                                  |
| Valid Field          | mm-dd-yyyy                                                                                                                                                                                                                                                                                                                                                                                                                                                                                            |
| Directives           | <p>Record the first date that a distant metastatic site was identified by imaging for the breast cancer.</p> <p>If the full date is not known, estimate the date on using the components that are known.</p> <ul style="list-style-type: none"> <li>• If month and year of the date is known, and the day of the month is not known, record 15 for the day.</li> <li>• If year of the date is known, and the day and month is not known, record 6 (June) for the month and 15 for the day.</li> </ul> |



# Data Abstraction Guide: GENIE AKT1 Breast Cancer Project

|                             |                                                                                                                                                                                                                                                                                                                                                                                                                                                                                            |
|-----------------------------|--------------------------------------------------------------------------------------------------------------------------------------------------------------------------------------------------------------------------------------------------------------------------------------------------------------------------------------------------------------------------------------------------------------------------------------------------------------------------------------------|
|                             | <ul style="list-style-type: none"> <li>If the year is known, and the seasons are noted rather than the month and day, use the following: <ul style="list-style-type: none"> <li>For winter use January (1)</li> <li>For spring use April (4)</li> <li>For summer use July (7)</li> <li>For autumn use October (10)</li> </ul> </li> </ul> <p>Do not leave blank.</p>                                                                                                                       |
| <b>Identifier?</b>          | Y; this data element will not be shared with MSK. It will be used to calculate the interval in days.                                                                                                                                                                                                                                                                                                                                                                                       |
| <b>Required Field?</b>      | N                                                                                                                                                                                                                                                                                                                                                                                                                                                                                          |
| <b>Field Label</b>          | <b>Distant Metastatic Disease Interval, in Days - Automated</b>                                                                                                                                                                                                                                                                                                                                                                                                                            |
| <b>REDCap Variable Name</b> | mets_disease_date_int                                                                                                                                                                                                                                                                                                                                                                                                                                                                      |
| <b>Field Type</b>           | Calculated: datediff([dob_date],[distant_mets_disease_date],'d', 'mdy', false)                                                                                                                                                                                                                                                                                                                                                                                                             |
| <b>Directives</b>           | <p>Dependent upon <b><i>Date of Radiologically Confirmed Distant Metastatic Disease.</i></b></p> <p>If the <b><i>Date of Radiologically Confirmed Distant Metastatic Disease</i></b> was entered, REDCap will calculate this field by subtracting the <b><i>Date of Birth</i></b> from the <b><i>Date of Radiologically Confirmed Distant Metastatic Disease.</i></b></p>                                                                                                                  |
| <b>Identifier?</b>          | N                                                                                                                                                                                                                                                                                                                                                                                                                                                                                          |
| <b>Required Field?</b>      | N                                                                                                                                                                                                                                                                                                                                                                                                                                                                                          |
| <b>Field Label</b>          | <b>Was a biopsy performed of metastatic site?</b>                                                                                                                                                                                                                                                                                                                                                                                                                                          |
| <b>REDCap Variable Name</b> | biopsy_yn                                                                                                                                                                                                                                                                                                                                                                                                                                                                                  |
| <b>Field Type</b>           | yesno                                                                                                                                                                                                                                                                                                                                                                                                                                                                                      |
| <b>Directives</b>           | <p>Record 'Yes' if a biopsy was taken from one or more of the first distant sites. Biopsies can include incisional biopsies, excisional biopsies, needle biopsies, FNAs, and aspirations.</p> <p>If you are unsure as to whether or not a patient had a biopsy of a metastatic site (e.g. patient could have had biopsy at outside institution), and your institution has no documentation indicating a that biopsy of a metastatic site was performed there or elsewhere, enter 'No'.</p> |
| <b>Identifier?</b>          | N                                                                                                                                                                                                                                                                                                                                                                                                                                                                                          |
| <b>Required Field?</b>      | N                                                                                                                                                                                                                                                                                                                                                                                                                                                                                          |
| <b>Field Label</b>          | <b>Did the ER/PR/HER2 status differ (positive to negative or vice versa) from primary tumor?</b>                                                                                                                                                                                                                                                                                                                                                                                           |
| <b>REDCap Variable Name</b> | receptor_status_change                                                                                                                                                                                                                                                                                                                                                                                                                                                                     |
| <b>Field Type</b>           | yesno                                                                                                                                                                                                                                                                                                                                                                                                                                                                                      |
| <b>Directives</b>           | Linked to <b><i>Was a biopsy performed of metastatic site?</i></b> - if the response is 'Yes' <b><i>Did the ER/PR/HER2 status differ (positive to negative or vice versa) from primary tumor?</i></b> becomes active.                                                                                                                                                                                                                                                                      |

# Data Abstraction Guide: GENIE AKT1 Breast Cancer Project

|                      |                                                                                                                                                                                                                                                                                                                                                                                                                                                                                                                                                                                                                                                                                                                                                                                              |
|----------------------|----------------------------------------------------------------------------------------------------------------------------------------------------------------------------------------------------------------------------------------------------------------------------------------------------------------------------------------------------------------------------------------------------------------------------------------------------------------------------------------------------------------------------------------------------------------------------------------------------------------------------------------------------------------------------------------------------------------------------------------------------------------------------------------------|
|                      | Record 'Yes' if ER or PR or HER2 status changed from that which was recorded for the primary tumor. Only one of the three needs to change in order to record 'Yes.'                                                                                                                                                                                                                                                                                                                                                                                                                                                                                                                                                                                                                          |
| Identifier?          | N                                                                                                                                                                                                                                                                                                                                                                                                                                                                                                                                                                                                                                                                                                                                                                                            |
| Required Field?      | N                                                                                                                                                                                                                                                                                                                                                                                                                                                                                                                                                                                                                                                                                                                                                                                            |
| <b>Field Label</b>   | <b>PR Status Change</b>                                                                                                                                                                                                                                                                                                                                                                                                                                                                                                                                                                                                                                                                                                                                                                      |
| REDCap Variable Name | receptor_change_pr                                                                                                                                                                                                                                                                                                                                                                                                                                                                                                                                                                                                                                                                                                                                                                           |
| Field Type           | dropdown                                                                                                                                                                                                                                                                                                                                                                                                                                                                                                                                                                                                                                                                                                                                                                                     |
| Choice List          | 1, Positive   2, Negative   99, UNK                                                                                                                                                                                                                                                                                                                                                                                                                                                                                                                                                                                                                                                                                                                                                          |
|                      | Linked to <b><i>Did the ER/PR/HER2 status differ (positive to negative or vice versa) from primary tumor?</i></b> If the response is 'Yes' <b>PR Status Change</b> becomes active.<br><br>Record '1, Positive' if the distant site is noted in the pathology report to be positive for progesterone receptors. If the PR status is reported as a percentage greater than 1%, record '1, Positive.' If PR status is reported as less than or equal to 1%, record '2, Negative.'<br><br>If the pathology report for the biopsy of the distant met is not available, but the treating physician states that the metastatic site is positive for progesterone receptors, record '1, Positive.'<br><br><b>Directives</b><br>If the pathology report does not include PR status, report '99. UNK.' |
| Identifier?          | N                                                                                                                                                                                                                                                                                                                                                                                                                                                                                                                                                                                                                                                                                                                                                                                            |
| Required Field?      | N                                                                                                                                                                                                                                                                                                                                                                                                                                                                                                                                                                                                                                                                                                                                                                                            |
| <b>Field Label</b>   | <b>ER Status Change</b>                                                                                                                                                                                                                                                                                                                                                                                                                                                                                                                                                                                                                                                                                                                                                                      |
| REDCap Variable Name | receptor_change_er                                                                                                                                                                                                                                                                                                                                                                                                                                                                                                                                                                                                                                                                                                                                                                           |
| Field Type           | dropdown                                                                                                                                                                                                                                                                                                                                                                                                                                                                                                                                                                                                                                                                                                                                                                                     |
| Choice List          | 1, Positive   2, Negative   3, UNK                                                                                                                                                                                                                                                                                                                                                                                                                                                                                                                                                                                                                                                                                                                                                           |
|                      | Linked to <b><i>Did the ER/PR/HER2 status differ (positive to negative or vice versa) from primary tumor?</i></b> If the response is 'Yes' <b>ER Status Change</b> becomes active.<br><br>Record '1, Positive' if the distant site is noted in the pathology report to be positive for estrogen receptors. If the ER status is reported as a percentage greater than 1%, record '1, Positive.' If ER status is reported as less than or equal to 1%, record '2, Negative.'<br><br>If the pathology report for the biopsy of the distant met is not available, but the treating physician states that the metastatic site is positive for estrogen receptors, record '1, Positive.'<br><br><b>Directives</b><br>If the pathology report does not include PR status, report '99. UNK.'         |
| Identifier?          | N                                                                                                                                                                                                                                                                                                                                                                                                                                                                                                                                                                                                                                                                                                                                                                                            |

# Data Abstraction Guide: GENIE AKT1 Breast Cancer Project

|                      |                                                                                                                                                                                                                                                                                                                                                                                                                                                                                                                                                                                                                                                                                                                                                       |
|----------------------|-------------------------------------------------------------------------------------------------------------------------------------------------------------------------------------------------------------------------------------------------------------------------------------------------------------------------------------------------------------------------------------------------------------------------------------------------------------------------------------------------------------------------------------------------------------------------------------------------------------------------------------------------------------------------------------------------------------------------------------------------------|
| Required Field?      | N                                                                                                                                                                                                                                                                                                                                                                                                                                                                                                                                                                                                                                                                                                                                                     |
| Field Label          | <b>HER2 Status Change</b>                                                                                                                                                                                                                                                                                                                                                                                                                                                                                                                                                                                                                                                                                                                             |
| REDCap Variable Name | receptor_change_her2                                                                                                                                                                                                                                                                                                                                                                                                                                                                                                                                                                                                                                                                                                                                  |
| Field Type           | dropdown                                                                                                                                                                                                                                                                                                                                                                                                                                                                                                                                                                                                                                                                                                                                              |
| Choice List          | 1, Positive   2, Negative   99, UNK                                                                                                                                                                                                                                                                                                                                                                                                                                                                                                                                                                                                                                                                                                                   |
|                      | <p>Linked to <b><i>Did the ER/PR/HER2 status differ (positive to negative or vice versa) from primary tumor?</i></b> If the response is 'Yes' <b>HER2 Status Change</b> becomes active.<br/>Record '1, Positive' if the primary breast tumor is noted in the pathology report to be positive for HER2 by IHC at 3+ or FISH&gt;2.</p> <p>If the HER2 is reported by IHC at 2+ and FISH was either not done or was done but reported as Equivocal record '2, Equivocal;'</p> <p>Anything else is "0, Negative", for e.g HER2 IHC 2+ but FISH is non-amplified.</p> <p>If the pathology reports for the biopsy of the distant met is not available, but the treating physician records that the breast cancer is HER2 positive record '1, Positive.'</p> |
| Directives           | If the pathology report does not include PR status, report '99. UNK.'                                                                                                                                                                                                                                                                                                                                                                                                                                                                                                                                                                                                                                                                                 |
| Identifier?          | N                                                                                                                                                                                                                                                                                                                                                                                                                                                                                                                                                                                                                                                                                                                                                     |
| Required Field?      | N                                                                                                                                                                                                                                                                                                                                                                                                                                                                                                                                                                                                                                                                                                                                                     |
| Field Label          | <b>Met Site: Bone</b>                                                                                                                                                                                                                                                                                                                                                                                                                                                                                                                                                                                                                                                                                                                                 |
| REDCap Variable Name | bone_yn                                                                                                                                                                                                                                                                                                                                                                                                                                                                                                                                                                                                                                                                                                                                               |
| Field Type           | radio                                                                                                                                                                                                                                                                                                                                                                                                                                                                                                                                                                                                                                                                                                                                                 |
| Choice List          | 1, Yes   0, No   99, Unknown                                                                                                                                                                                                                                                                                                                                                                                                                                                                                                                                                                                                                                                                                                                          |
|                      | <p>Linked to <b><i>Date of Radiologically Confirmed Distant Metastatic Disease.</i></b> Use this date to determine whether metastasis to the bone is found within 30 days of the <b><i>Date of Radiologically Confirmed Distant Metastatic Disease</i></b> – if so, the bone is a first distant site of metastasis.</p> <p>If the breast cancer first metastasized to the bone, record '1, Yes.'</p> <p>If there is no evidence that the breast cancer metastasized to the bone at the time of the first distant metastasis, record '0, No.'</p> <p>If the evidence is equivocal like the imaging report states that the bone is questionable, record '99, Unknown.'</p>                                                                              |
| Directives           |                                                                                                                                                                                                                                                                                                                                                                                                                                                                                                                                                                                                                                                                                                                                                       |
| Identifier?          | N                                                                                                                                                                                                                                                                                                                                                                                                                                                                                                                                                                                                                                                                                                                                                     |
| Required Field?      | N                                                                                                                                                                                                                                                                                                                                                                                                                                                                                                                                                                                                                                                                                                                                                     |
| Field Label          | <b>Met Site: Liver</b>                                                                                                                                                                                                                                                                                                                                                                                                                                                                                                                                                                                                                                                                                                                                |
| REDCap Variable Name | liver_yn                                                                                                                                                                                                                                                                                                                                                                                                                                                                                                                                                                                                                                                                                                                                              |
| Field Type           | Radio                                                                                                                                                                                                                                                                                                                                                                                                                                                                                                                                                                                                                                                                                                                                                 |

# Data Abstraction Guide: GENIE AKT1 Breast Cancer Project

|                             |                                                                                                                                                                                                                                                                                                                                                                                                                                                                                                                                                                                                                                                                               |
|-----------------------------|-------------------------------------------------------------------------------------------------------------------------------------------------------------------------------------------------------------------------------------------------------------------------------------------------------------------------------------------------------------------------------------------------------------------------------------------------------------------------------------------------------------------------------------------------------------------------------------------------------------------------------------------------------------------------------|
| <b>Choice List</b>          | 1, Yes   0, No   99, Unknown                                                                                                                                                                                                                                                                                                                                                                                                                                                                                                                                                                                                                                                  |
| <b>Directives</b>           | <p>Linked to <b><i>Date of Radiologically Confirmed Distant Metastatic Disease</i></b>. Use this date to determine whether metastasis to the liver is found within 30 days of the <b><i>Date of Radiologically Confirmed Distant Metastatic Disease</i></b> – if so, the liver is a first distant site of metastasis.</p> <p>If the breast cancer first metastasized to the liver, record ‘1, Yes.’</p> <p>If there is no evidence that the breast cancer metastasized to the liver at the time of the first distant metastasis, record ‘0, No.’</p> <p>If the evidence is equivocal like the imaging report states that the liver is questionable, record ‘99, Unknown.’</p> |
| <b>Identifier?</b>          | N                                                                                                                                                                                                                                                                                                                                                                                                                                                                                                                                                                                                                                                                             |
| <b>Required Field?</b>      | N                                                                                                                                                                                                                                                                                                                                                                                                                                                                                                                                                                                                                                                                             |
| <b>Field Label</b>          | <b>Met Site: Lung</b>                                                                                                                                                                                                                                                                                                                                                                                                                                                                                                                                                                                                                                                         |
| <b>REDCap Variable Name</b> | lung_yn                                                                                                                                                                                                                                                                                                                                                                                                                                                                                                                                                                                                                                                                       |
| <b>Field Type</b>           | Radio                                                                                                                                                                                                                                                                                                                                                                                                                                                                                                                                                                                                                                                                         |
| <b>Choice List</b>          | 1, Yes   0, No   99, Unknown                                                                                                                                                                                                                                                                                                                                                                                                                                                                                                                                                                                                                                                  |
| <b>Directives</b>           | <p>Linked to <b><i>Date of Radiologically Confirmed Distant Metastatic Disease</i></b>. Use this date to determine whether metastasis to the lung is found within 30 days of the <b><i>Date of Radiologically Confirmed Distant Metastatic Disease</i></b> – if so, the lung is a first distant site of metastasis.</p> <p>If the breast cancer first metastasized to the lung, record ‘1, Yes.’</p> <p>If there is no evidence that the breast cancer metastasized to the lung at the time of the first distant metastasis, record ‘0, No.’</p> <p>If the evidence is equivocal like the imaging report states that the lung is questionable, record ‘99, Unknown.’</p>      |
| <b>Identifier?</b>          | N                                                                                                                                                                                                                                                                                                                                                                                                                                                                                                                                                                                                                                                                             |
| <b>Required Field?</b>      | N                                                                                                                                                                                                                                                                                                                                                                                                                                                                                                                                                                                                                                                                             |
| <b>Field Label</b>          | <b>Met Site: Brain</b>                                                                                                                                                                                                                                                                                                                                                                                                                                                                                                                                                                                                                                                        |
| <b>REDCap Variable Name</b> | brain_yn                                                                                                                                                                                                                                                                                                                                                                                                                                                                                                                                                                                                                                                                      |
| <b>Field Type</b>           | Radio                                                                                                                                                                                                                                                                                                                                                                                                                                                                                                                                                                                                                                                                         |
| <b>Choice List</b>          | 1, Yes   0, No   99, Unknown                                                                                                                                                                                                                                                                                                                                                                                                                                                                                                                                                                                                                                                  |
| <b>Directives</b>           | <p>Linked to <b><i>Date of Radiologically Confirmed Distant Metastatic Disease</i></b>. Use this date to determine whether metastasis to the brain is found within 30 days of the <b><i>Date of Radiologically Confirmed Distant Metastatic Disease</i></b> – if so, the brain is a first distant site of metastasis.</p> <p>If the breast cancer first metastasized to the brain, record ‘1, Yes.’</p>                                                                                                                                                                                                                                                                       |

# Data Abstraction Guide: GENIE AKT1 Breast Cancer Project

|                      |                                                                                                                                                                                                                                                                                                                                                                                                                                                                                                                                                                                                                                                                                                         |
|----------------------|---------------------------------------------------------------------------------------------------------------------------------------------------------------------------------------------------------------------------------------------------------------------------------------------------------------------------------------------------------------------------------------------------------------------------------------------------------------------------------------------------------------------------------------------------------------------------------------------------------------------------------------------------------------------------------------------------------|
|                      | <p>If there is no evidence that the breast cancer metastasized to the brain at the time of the first distant metastasis, record '0, No.'</p> <p>If the evidence is equivocal like the imaging report states that the brain is questionable, record '99, Unknown.'</p>                                                                                                                                                                                                                                                                                                                                                                                                                                   |
| Identifier?          | N                                                                                                                                                                                                                                                                                                                                                                                                                                                                                                                                                                                                                                                                                                       |
| Required Field?      | N                                                                                                                                                                                                                                                                                                                                                                                                                                                                                                                                                                                                                                                                                                       |
| Field Label          | <b>Met Site: Lymph Node (do not include local or regional)</b>                                                                                                                                                                                                                                                                                                                                                                                                                                                                                                                                                                                                                                          |
| REDCap Variable Name | lymph_yn                                                                                                                                                                                                                                                                                                                                                                                                                                                                                                                                                                                                                                                                                                |
| Field Type           | Radio                                                                                                                                                                                                                                                                                                                                                                                                                                                                                                                                                                                                                                                                                                   |
| Choice List          | 1, Yes   0, No   99, Unknown                                                                                                                                                                                                                                                                                                                                                                                                                                                                                                                                                                                                                                                                            |
| Directives           | <p>Linked to <b><i>Date of Radiologically Confirmed Distant Metastatic Disease</i></b>. Use this date to determine whether metastasis to a lymph node is found within 30 days of the <b><i>Date of Radiologically Confirmed Distant Metastatic Disease</i></b> – if so, the lymph node is a first distant site of metastasis.</p> <p>If the breast cancer first metastasized to the lymph node, record '1, Yes.'</p> <p>If there is no evidence that the breast cancer metastasized to the lymph node at the time of the first distant metastasis, record '0, No.'</p> <p>If the evidence is equivocal like the imaging report states that the lymph node is questionable, record '99, Unknown.'</p>    |
| Identifier?          | N                                                                                                                                                                                                                                                                                                                                                                                                                                                                                                                                                                                                                                                                                                       |
| Required Field?      | N                                                                                                                                                                                                                                                                                                                                                                                                                                                                                                                                                                                                                                                                                                       |
| Field Label          | <b>Met Site: Soft Tissue</b>                                                                                                                                                                                                                                                                                                                                                                                                                                                                                                                                                                                                                                                                            |
| REDCap Variable Name | Soft_tissue_yn                                                                                                                                                                                                                                                                                                                                                                                                                                                                                                                                                                                                                                                                                          |
| Field Type           | Radio                                                                                                                                                                                                                                                                                                                                                                                                                                                                                                                                                                                                                                                                                                   |
| Choice List          | 1, Yes   0, No   99, Unknown                                                                                                                                                                                                                                                                                                                                                                                                                                                                                                                                                                                                                                                                            |
| Directives           | <p>Linked to <b><i>Date of Radiologically Confirmed Distant Metastatic Disease</i></b>. Use this date to determine whether metastasis to soft tissue is found within 30 days of the <b><i>Date of Radiologically Confirmed Distant Metastatic Disease</i></b> – if so, the soft tissue is a first distant site of metastasis.</p> <p>If the breast cancer first metastasized to the soft tissue, record '1, Yes.'</p> <p>If there is no evidence that the breast cancer metastasized to the soft tissue at the time of the first distant metastasis, record '0, No.'</p> <p>If the evidence is equivocal like the imaging report states that the soft tissue is questionable, record '99, Unknown.'</p> |
| Identifier?          | N                                                                                                                                                                                                                                                                                                                                                                                                                                                                                                                                                                                                                                                                                                       |
| Required Field?      | N                                                                                                                                                                                                                                                                                                                                                                                                                                                                                                                                                                                                                                                                                                       |

# Data Abstraction Guide: GENIE AKT1 Breast Cancer Project

|                             |                                                                                                                                                                                                                                                                                                                                                                                                                                                                                                                                                                                                                                                                                                                        |
|-----------------------------|------------------------------------------------------------------------------------------------------------------------------------------------------------------------------------------------------------------------------------------------------------------------------------------------------------------------------------------------------------------------------------------------------------------------------------------------------------------------------------------------------------------------------------------------------------------------------------------------------------------------------------------------------------------------------------------------------------------------|
| <b>Field Label</b>          | <b>Met Site: Other Site</b>                                                                                                                                                                                                                                                                                                                                                                                                                                                                                                                                                                                                                                                                                            |
| <b>REDCap Variable Name</b> | other_yn                                                                                                                                                                                                                                                                                                                                                                                                                                                                                                                                                                                                                                                                                                               |
| <b>Field Type</b>           | Radio                                                                                                                                                                                                                                                                                                                                                                                                                                                                                                                                                                                                                                                                                                                  |
| <b>Choice List</b>          | 1, Yes   0, No   99, Unknown                                                                                                                                                                                                                                                                                                                                                                                                                                                                                                                                                                                                                                                                                           |
| <b>Directives</b>           | <p>Linked to <b><i>Date of Radiologically Confirmed Distant Metastatic Disease</i></b>. Use this date to determine whether metastasis to a site that is not listed is found within 30 days of the <b><i>Date of Radiologically Confirmed Distant Metastatic Disease</i></b> – if so, this other site is a first distant site of metastasis.</p> <p>If the breast cancer first metastasized to a site that is not listed, record ‘1, Yes.’</p> <p>If there is no evidence that the breast cancer metastasized to another at the time of the first distant metastasis, record ‘0, No.’</p> <p>If the evidence is equivocal like the imaging report states that the other site is questionable, record ‘99, Unknown.’</p> |
| <b>Identifier?</b>          | N                                                                                                                                                                                                                                                                                                                                                                                                                                                                                                                                                                                                                                                                                                                      |
| <b>Required Field?</b>      | N                                                                                                                                                                                                                                                                                                                                                                                                                                                                                                                                                                                                                                                                                                                      |
| <b>Field Label</b>          | <b>Met Site: Which Site?</b>                                                                                                                                                                                                                                                                                                                                                                                                                                                                                                                                                                                                                                                                                           |
| <b>REDCap Variable Name</b> | mets_site                                                                                                                                                                                                                                                                                                                                                                                                                                                                                                                                                                                                                                                                                                              |
| <b>Field Type</b>           | text                                                                                                                                                                                                                                                                                                                                                                                                                                                                                                                                                                                                                                                                                                                   |
| <b>Directives</b>           | <p>Linked to <b>Met Site: Other Site</b>. If the response is ‘Yes,’ Met Site: Which Site? becomes active.</p> <p>Record the other site of first distant metastasis.</p>                                                                                                                                                                                                                                                                                                                                                                                                                                                                                                                                                |
| <b>Identifier?</b>          | N                                                                                                                                                                                                                                                                                                                                                                                                                                                                                                                                                                                                                                                                                                                      |
| <b>Required Field?</b>      | N                                                                                                                                                                                                                                                                                                                                                                                                                                                                                                                                                                                                                                                                                                                      |

# Data Abstraction Guide: GENIE AKT1 Breast Cancer Project

## Other (Non-Breast) Cancer Diagnoses Sub-Section

### Abstracting Notes:

1. Other cancer diagnoses should be entered into this section; up to three diagnoses can be entered.
2. The other cancers can be diagnosed either prior to or following the breast cancer diagnosis that is eligible for this study.
3. The other cancers should be invasive.
4. Do not record pre-cancerous or non-invasive cancers.

**Other (Non-Breast) Cancer Diagnoses**

Has the patient had another (non-Breast) cancer diagnosis?  Yes  No reset

Number of non-Breast cancer diagnoses:

Non-Breast Diagnosis Oncotree Code: Please [see here](#) for Onco-Tree Code by disease type.

Non-Breast Diagnosis Oncotree Code: Please [see here](#) for Onco-Tree Code by disease type.

Non-Breast Diagnosis Oncotree Code: Please [see here](#) for Onco-Tree Code by disease type.

**Form Status**

Complete?

|                             |                                                                                                                                                                        |
|-----------------------------|------------------------------------------------------------------------------------------------------------------------------------------------------------------------|
| <b>Field Label</b>          | <b>Has the patient had another (non-Breast) cancer diagnosis?</b>                                                                                                      |
| <b>REDCap Variable Name</b> | nonbreast_ca_dx_yn                                                                                                                                                     |
| <b>Field Type</b>           | Yesno                                                                                                                                                                  |
| <b>Directives</b>           | If the patient has had one or more invasive cancer diagnoses, record 'Yes.'<br>If the patient has not had another invasive cancer diagnosis, record 'No'               |
| <b>Identifier?</b>          | N                                                                                                                                                                      |
| <b>Required Field?</b>      | N                                                                                                                                                                      |
| <b>Field Label</b>          | <b>Number of non-Breast cancer diagnoses</b>                                                                                                                           |
| <b>REDCap Variable Name</b> | nonbreast_ca_dx_number                                                                                                                                                 |
| <b>Field Type</b>           | Text                                                                                                                                                                   |
| <b>Valid Field</b>          | 1-100                                                                                                                                                                  |
| <b>Directives</b>           | Linked to <i>Has the patient had another (non-Breast) cancer diagnosis?</i> If the response is 'Yes' then <i>Number of non-Breast cancer diagnoses</i> becomes active. |

# Data Abstraction Guide: GENIE AKT1 Breast Cancer Project

|                      |                                                                                                                                                                                                                                                                                                                      |
|----------------------|----------------------------------------------------------------------------------------------------------------------------------------------------------------------------------------------------------------------------------------------------------------------------------------------------------------------|
| Identifier?          | N                                                                                                                                                                                                                                                                                                                    |
| Required Field?      | N                                                                                                                                                                                                                                                                                                                    |
| <b>Field Label</b>   | <b>Non-Breast Diagnosis Oncotree Code, Number 1</b>                                                                                                                                                                                                                                                                  |
| REDCap Variable Name | non_breast_oncotree_code_1                                                                                                                                                                                                                                                                                           |
| Field Type           | Text                                                                                                                                                                                                                                                                                                                 |
| Directives           | Linked to <i>Has the patient had another (non-Breast) cancer diagnosis?</i> If the response is 'Yes' then <i>Non-Breast Diagnosis Oncotree Code</i> becomes active.<br><br>Please refer to <a href="http://www.cbioportal.org/oncotree/">http://www.cbioportal.org/oncotree/</a> for Onco-Tree Code by disease type. |
| Identifier?          | N                                                                                                                                                                                                                                                                                                                    |
| Required Field?      | N                                                                                                                                                                                                                                                                                                                    |
| <b>Field Label</b>   | <b>Non-Breast Diagnosis Oncotree Code, Number 2</b>                                                                                                                                                                                                                                                                  |
| REDCap Variable Name | non_breast_oncotree_code_2                                                                                                                                                                                                                                                                                           |
| Field Type           | Text                                                                                                                                                                                                                                                                                                                 |
| Directives           | Linked to <i>Has the patient had another (non-Breast) cancer diagnosis?</i> If the response is 'Yes' then <i>Non-Breast Diagnosis Oncotree Code</i> becomes active.<br><br>Please refer to <a href="http://www.cbioportal.org/oncotree/">http://www.cbioportal.org/oncotree/</a> for Onco-Tree Code by disease type. |
| Identifier?          | N                                                                                                                                                                                                                                                                                                                    |
| Required Field?      | N                                                                                                                                                                                                                                                                                                                    |
| <b>Field Label</b>   | <b>Non-Breast Diagnosis Oncotree Code, Number 3</b>                                                                                                                                                                                                                                                                  |
| REDCap Variable Name | non_breast_oncotree_code_3                                                                                                                                                                                                                                                                                           |
| Field Type           | Text                                                                                                                                                                                                                                                                                                                 |
| Directives           | Linked to <i>Has the patient had another (non-Breast) cancer diagnosis?</i> If the response is 'Yes' then <i>Non-Breast Diagnosis Oncotree Code</i> becomes active.<br><br>Please refer to <a href="http://www.cbioportal.org/oncotree/">http://www.cbioportal.org/oncotree/</a> for Onco-Tree Code by disease type. |
| Identifier?          | N                                                                                                                                                                                                                                                                                                                    |
| Required Field?      | N                                                                                                                                                                                                                                                                                                                    |
| <b>Field Label</b>   | <b>Form Status: Complete?</b>                                                                                                                                                                                                                                                                                        |
| REDCap Variable Name |                                                                                                                                                                                                                                                                                                                      |
| Field Type           | Dropdown                                                                                                                                                                                                                                                                                                             |
| Choice List          | Incomplete   Unverified   Complete                                                                                                                                                                                                                                                                                   |
| Directives           | Record 'Complete' once all of the data fields in this section have been entered and the eligibility calculation has been performed. This field will be used during data quality review.<br><br>'Incomplete' is the default choice; patients with any indication of 'Incomplete' or                                   |



# Data Abstraction Guide: GENIE AKT1 Breast Cancer Project

---

|                        |                                                           |
|------------------------|-----------------------------------------------------------|
|                        | 'Unverified' sections are not eligible for data analysis. |
| <b>Identifier?</b>     | N                                                         |
| <b>Required Field?</b> | N                                                         |

# Data Abstraction Guide: GENIE AKT1 Breast Cancer Project

---

## TUMOR SAMPLE SEQUENCING INFORMATION

### Abstracting Notes:

2. Some of the data fields found in this section should be provided by Sage through a download of each center's GENIE data submission.
3. The set of data elements in this section should be completed for each specimen sampled and submitted to GENIE.
  - a. The last question in the set 'Was another sample sequenced in this patient?' will drive the data collection. If 'Yes' is answered, then another set of data fields will appear for the next sample.

# Data Abstraction Guide: GENIE AKT1 Breast Cancer Project

**Tumor Sample Sequencing Information**

Re-assign this record to another Data Access Group? DFC

---

Editing existing Record ID 1 - 1a

Record ID 1

**Sample 1**

**Date sample was collected:**   M-D-Y  
PLEASE ENTER DATE IN MM - DD - YYYY FORMAT!

**Sample Date Interval**

**Sample Type**

**Date of the Sequencing Report**   M-D-Y  
DEFINED AS THE DATE THE REPORT OF TUMOR SEQUENCING WAS ISSUED\*

**Sequence Report Date Interval**

**GENIE Sample ID (if available):**

**Sequencing Method**

**PR status**   
POSITIVE = (> 1%)

**HER2 Status**   
POSITIVE= (IHC 3+/FISH>2), EQUIVOCAL=(IHC 2+)

**ER Status**   
POSITIVE = (> 1%)

**AKT Mutation Status**   
\* must provide value

**ERBB2 Mutation Status**   
\* must provide value

**ESR1 Mutation Status:**   
\* must provide value

**PIK3CA Mutation Status:**   
\* must provide value

**Was another sample sequenced in this patient?**  Yes  No

---

**Form Status**

**Complete?**

|                             |                                                                                                                                                                                                                            |
|-----------------------------|----------------------------------------------------------------------------------------------------------------------------------------------------------------------------------------------------------------------------|
| <b>Field Label</b>          | <b>Date sample was collected</b>                                                                                                                                                                                           |
| <b>REDCap Variable Name</b> | sample_date_1                                                                                                                                                                                                              |
| <b>Field Type</b>           | text                                                                                                                                                                                                                       |
| <b>Valid Field</b>          | mm-dd-yyyy                                                                                                                                                                                                                 |
| <b>Directives</b>           | Record the date that the sequenced sample was actually collected for sequencing (i.e. biopsy or surgery date). Note that the actual date of sample collection can often be years before the sample is sent for sequencing. |

# Data Abstraction Guide: GENIE AKT1 Breast Cancer Project

|                             |                                                                                                                                                                                                                                                                                                                                                                                                                                                                                                                                                                                                                                                                                                                                |
|-----------------------------|--------------------------------------------------------------------------------------------------------------------------------------------------------------------------------------------------------------------------------------------------------------------------------------------------------------------------------------------------------------------------------------------------------------------------------------------------------------------------------------------------------------------------------------------------------------------------------------------------------------------------------------------------------------------------------------------------------------------------------|
|                             | <p>If the full date is not known, estimate the date on using the components that are known.</p> <ul style="list-style-type: none"> <li>• If month and year of the date is known, and the day of the month is not known, record 15 for the day.</li> <li>• If year of the date is known, and the day and month is not known, record 6 (June) for the month and 15 for the day.</li> <li>• If the year is known, and the seasons are noted rather than the month and day, use the following: <ul style="list-style-type: none"> <li>○ For winter use January (1)</li> <li>○ For spring use April (4)</li> <li>○ For summer use July (7)</li> <li>○ For autumn use October (10)</li> </ul> </li> </ul> <p>Do not leave blank.</p> |
| <b>Identifier?</b>          | Y; this data element will not be shared with MSK. It will be used to calculate the interval in days.                                                                                                                                                                                                                                                                                                                                                                                                                                                                                                                                                                                                                           |
| <b>Required Field?</b>      | N                                                                                                                                                                                                                                                                                                                                                                                                                                                                                                                                                                                                                                                                                                                              |
| <b>Field Label</b>          | <b>Sample Date Interval – Automated</b>                                                                                                                                                                                                                                                                                                                                                                                                                                                                                                                                                                                                                                                                                        |
| <b>REDCap Variable Name</b> | sample_date_int_1                                                                                                                                                                                                                                                                                                                                                                                                                                                                                                                                                                                                                                                                                                              |
| <b>Field Type</b>           | Calculated: datediff([dob_date],[sample_date_1], 'd', 'mdy', false)                                                                                                                                                                                                                                                                                                                                                                                                                                                                                                                                                                                                                                                            |
| <b>Directives</b>           |                                                                                                                                                                                                                                                                                                                                                                                                                                                                                                                                                                                                                                                                                                                                |
| <b>Identifier?</b>          | N                                                                                                                                                                                                                                                                                                                                                                                                                                                                                                                                                                                                                                                                                                                              |
| <b>Required Field?</b>      | N                                                                                                                                                                                                                                                                                                                                                                                                                                                                                                                                                                                                                                                                                                                              |
| <b>Field Label</b>          | <b>Sample Type</b>                                                                                                                                                                                                                                                                                                                                                                                                                                                                                                                                                                                                                                                                                                             |
| <b>REDCap Variable Name</b> | sample_type_1                                                                                                                                                                                                                                                                                                                                                                                                                                                                                                                                                                                                                                                                                                                  |
| <b>Field Type</b>           | dropdown                                                                                                                                                                                                                                                                                                                                                                                                                                                                                                                                                                                                                                                                                                                       |
| <b>Choice List</b>          | 1, Primary tumor   2, Lymph node metastasis   3, Distant organ metastasis   4, Metastasis site unspecified   5, Local recurrence   6, Not otherwise specified   7, Primary, local recurrence, or metastasis                                                                                                                                                                                                                                                                                                                                                                                                                                                                                                                    |
| <b>Directives</b>           | This data can be imported using the center’s GENIE submission; if this is not available the data field should be entered by the data abstractor.<br><br>If the data field is not pre-populated, record the sample type.                                                                                                                                                                                                                                                                                                                                                                                                                                                                                                        |
| <b>Identifier?</b>          | N                                                                                                                                                                                                                                                                                                                                                                                                                                                                                                                                                                                                                                                                                                                              |
| <b>Required Field?</b>      | N                                                                                                                                                                                                                                                                                                                                                                                                                                                                                                                                                                                                                                                                                                                              |
| <b>Field Label</b>          | <b>Date of the Sequencing Report</b>                                                                                                                                                                                                                                                                                                                                                                                                                                                                                                                                                                                                                                                                                           |
| <b>REDCap Variable Name</b> | sequence_report_date_1                                                                                                                                                                                                                                                                                                                                                                                                                                                                                                                                                                                                                                                                                                         |
| <b>Field Type</b>           | text                                                                                                                                                                                                                                                                                                                                                                                                                                                                                                                                                                                                                                                                                                                           |
| <b>Valid Field</b>          | mm-dd-yyyy                                                                                                                                                                                                                                                                                                                                                                                                                                                                                                                                                                                                                                                                                                                     |
| <b>Directives</b>           | This data can be imported using the center’s GENIE submission; if this is not available                                                                                                                                                                                                                                                                                                                                                                                                                                                                                                                                                                                                                                        |

# Data Abstraction Guide: GENIE AKT1 Breast Cancer Project

|                             |                                                                                                                                                                                                                                                         |
|-----------------------------|---------------------------------------------------------------------------------------------------------------------------------------------------------------------------------------------------------------------------------------------------------|
|                             | <p>the data field should be entered by the data abstractor.</p> <p>If the data field is not pre-populated, record the date that the sequencing report was issued.</p> <p>This date should be known and not be estimated.</p> <p>Do not leave blank.</p> |
| <b>Identifier?</b>          | Y; this data element will not be shared with MSK. It will be used to calculate the interval in days.                                                                                                                                                    |
| <b>Required Field?</b>      | N                                                                                                                                                                                                                                                       |
| <b>Field Label</b>          | <b>Sequence Report Date Interval - Automated</b>                                                                                                                                                                                                        |
| <b>REDCap Variable Name</b> | sequence_report_date_int_1                                                                                                                                                                                                                              |
| <b>Field Type</b>           | Calculated:<br>datediff([dob_date],[sequence_report_date_1],'d', 'mdy', false)                                                                                                                                                                          |
| <b>Directives</b>           |                                                                                                                                                                                                                                                         |
| <b>Identifier?</b>          | N                                                                                                                                                                                                                                                       |
| <b>Required Field?</b>      | N                                                                                                                                                                                                                                                       |
| <b>Field Label</b>          | <b>GENIE Sample ID (if available)</b>                                                                                                                                                                                                                   |
| <b>REDCap Variable Name</b> | genie_sample_id_1                                                                                                                                                                                                                                       |
| <b>Field Type</b>           | text                                                                                                                                                                                                                                                    |
| <b>Directives</b>           | This data can be imported using the center's GENIE submission; if this is not available the data field should be entered by the data abstractor.                                                                                                        |
| <b>Identifier?</b>          | N                                                                                                                                                                                                                                                       |
| <b>Required Field?</b>      | N                                                                                                                                                                                                                                                       |
| <b>Field Label</b>          | <b>Sequencing Method</b>                                                                                                                                                                                                                                |
| <b>REDCap Variable Name</b> | sequence_method_1                                                                                                                                                                                                                                       |
| <b>Field Type</b>           | dropdown                                                                                                                                                                                                                                                |
| <b>Choice List</b>          | 1, Sequenom   2, Miseq   3, Sanger   98, Other                                                                                                                                                                                                          |
| <b>Directives</b>           | This data can be imported using the center's GENIE submission; if this is not available the data field should be entered by the data abstractor.                                                                                                        |
| <b>Directives</b>           | Record the sequencing method. If the method used does not appear in the list, record '98, Other.'                                                                                                                                                       |
| <b>Identifier?</b>          | N                                                                                                                                                                                                                                                       |
| <b>Required Field?</b>      | N                                                                                                                                                                                                                                                       |
| <b>Field Label</b>          | <b>Specify Sequence Method</b>                                                                                                                                                                                                                          |
| <b>REDCap Variable Name</b> | other_sequence_method_1                                                                                                                                                                                                                                 |

# Data Abstraction Guide: GENIE AKT1 Breast Cancer Project

|                             |                                                                                                                                                                                                                                                                                                                                                                                                            |
|-----------------------------|------------------------------------------------------------------------------------------------------------------------------------------------------------------------------------------------------------------------------------------------------------------------------------------------------------------------------------------------------------------------------------------------------------|
| <b>Field Type</b>           | text                                                                                                                                                                                                                                                                                                                                                                                                       |
|                             | <p>This data can be imported using the center’s GENIE submission; if this is not available the data field should be entered by the data abstractor.</p> <p>Linked to <b>Sequencing Method</b>.</p> <p>If ‘98, Other’ is recorded for <b>Sequencing Method</b>, record the method used for sequencing or test name for e.g. Foundation One, local institution sequencing platform like MSK-IMPACT, etc.</p> |
| <b>Directives</b>           | If this not accessible, ask the Center PI for details.                                                                                                                                                                                                                                                                                                                                                     |
| <b>Identifier?</b>          | N                                                                                                                                                                                                                                                                                                                                                                                                          |
| <b>Required Field?</b>      | N                                                                                                                                                                                                                                                                                                                                                                                                          |
| <b>Field Label</b>          | <b>Progesterone Receptor – PR status of the Sequenced Sample</b>                                                                                                                                                                                                                                                                                                                                           |
| <b>REDCap Variable Name</b> | pr_status_1                                                                                                                                                                                                                                                                                                                                                                                                |
| <b>Field Type</b>           | dropdown                                                                                                                                                                                                                                                                                                                                                                                                   |
| <b>Choice List</b>          | 1, Positive   0, Negative   99, UNK                                                                                                                                                                                                                                                                                                                                                                        |
|                             | Record ‘1, Positive’ if the sequenced sample is noted in the pathology report to be positive for progesterone receptors. If the PR is reported as a percentage greater than 1%, record ‘1, Positive.’                                                                                                                                                                                                      |
| <b>Directives</b>           | If PR status of the sequenced sample is not noted, record ‘99, UNK.’                                                                                                                                                                                                                                                                                                                                       |
| <b>Identifier?</b>          | N                                                                                                                                                                                                                                                                                                                                                                                                          |
| <b>Required Field?</b>      | N                                                                                                                                                                                                                                                                                                                                                                                                          |
| <b>Field Label</b>          | <b>HER2 Status of the Sequenced Sample</b>                                                                                                                                                                                                                                                                                                                                                                 |
| <b>REDCap Variable Name</b> | her2_status                                                                                                                                                                                                                                                                                                                                                                                                |
| <b>Field Type</b>           | Dropdown                                                                                                                                                                                                                                                                                                                                                                                                   |
| <b>Choice List</b>          | 1, Positive   0, Negative   2, Equivocal   99, UNK                                                                                                                                                                                                                                                                                                                                                         |
|                             | Record ‘1, Positive’ if the sequenced sample noted in the to be positive for HER2 by IHC at 3+ or FISH>2.                                                                                                                                                                                                                                                                                                  |
|                             | If the HER2 status is reported by IHC at 2+ or 1+, record ‘2, Equivocal;’ additionally, if the HER2 is reported as FISH 1 or 2, record ‘2, Equivocal.’                                                                                                                                                                                                                                                     |
| <b>Directives</b>           | If HER2 status of the sequenced sample is not noted in the pathology report or by physician report, record ‘99, UNK.’                                                                                                                                                                                                                                                                                      |
| <b>Identifier?</b>          | N                                                                                                                                                                                                                                                                                                                                                                                                          |
| <b>Required Field?</b>      | N                                                                                                                                                                                                                                                                                                                                                                                                          |
| <b>Field Label</b>          | <b>Estrogen Receptor – ER status of the Sequenced Sample</b>                                                                                                                                                                                                                                                                                                                                               |
| <b>REDCap Variable Name</b> | er_status                                                                                                                                                                                                                                                                                                                                                                                                  |
| <b>Field Type</b>           | Dropdown                                                                                                                                                                                                                                                                                                                                                                                                   |
| <b>Choice List</b>          | 1, Positive   0, Negative   99, UNK                                                                                                                                                                                                                                                                                                                                                                        |
| <b>Directives</b>           | Record ‘1, Positive’ if the sequenced sample is noted to be positive for estrogen                                                                                                                                                                                                                                                                                                                          |

# Data Abstraction Guide: GENIE AKT1 Breast Cancer Project

|                             |                                                                                                                                                                                                                                                                                                                                                                                                                                                                     |
|-----------------------------|---------------------------------------------------------------------------------------------------------------------------------------------------------------------------------------------------------------------------------------------------------------------------------------------------------------------------------------------------------------------------------------------------------------------------------------------------------------------|
|                             | receptors. If the ER is reported as a percentage greater than 1%, record '1, Positive.'<br><br>If ER status of the sequenced sample is not noted, record '99, UNK.'                                                                                                                                                                                                                                                                                                 |
| <b>Identifier?</b>          | N                                                                                                                                                                                                                                                                                                                                                                                                                                                                   |
| <b>Required Field?</b>      | N                                                                                                                                                                                                                                                                                                                                                                                                                                                                   |
| <b>Field Label</b>          | <b>AKT Mutation Status</b>                                                                                                                                                                                                                                                                                                                                                                                                                                          |
| <b>REDCap Variable Name</b> | akt_mutation_status_1                                                                                                                                                                                                                                                                                                                                                                                                                                               |
| <b>Field Type</b>           | dropdown                                                                                                                                                                                                                                                                                                                                                                                                                                                            |
| <b>Choice List</b>          | 1, Mutant   2, Wildtype                                                                                                                                                                                                                                                                                                                                                                                                                                             |
|                             | The data for this field may be imported using the center's GENIE submission; if this does not occur, the data should be entered by the data abstractor.<br><br>If an AKT1 E17K mutation is identified, select '1, Mutant.'                                                                                                                                                                                                                                          |
| <b>Directives</b>           | If no AKT1 E17K mutation is identified, 'select 2, Wildtype.'                                                                                                                                                                                                                                                                                                                                                                                                       |
| <b>Identifier?</b>          | N                                                                                                                                                                                                                                                                                                                                                                                                                                                                   |
| <b>Required Field?</b>      | N                                                                                                                                                                                                                                                                                                                                                                                                                                                                   |
| <b>Field Label</b>          | <b>AKT Variant 1</b>                                                                                                                                                                                                                                                                                                                                                                                                                                                |
| <b>REDCap Variable Name</b> | akt_variant_1_sample_1                                                                                                                                                                                                                                                                                                                                                                                                                                              |
| <b>Field Type</b>           | text                                                                                                                                                                                                                                                                                                                                                                                                                                                                |
|                             | This data for this field may be imported using the center's GENIE submission; if this does not occur, the data should be entered by the data abstractor.<br><br>If the answer to "AKT Mutation Status" was "1, Mutant" ( i.e. an AKT 1 E17K mutation was identified), the variant is entered here. When annotating AKT1 variants, use the cDNA nomenclature, as provided by Sage.<br><br>e.g. AKT1 variant E17K should be entered as AKT1 variant <b>c.49G&gt;A</b> |
| <b>Directives</b>           |                                                                                                                                                                                                                                                                                                                                                                                                                                                                     |
| <b>Identifier?</b>          | N                                                                                                                                                                                                                                                                                                                                                                                                                                                                   |
| <b>Required Field?</b>      | N                                                                                                                                                                                                                                                                                                                                                                                                                                                                   |
| <b>Field Label</b>          | <b>AKT Variant 2</b>                                                                                                                                                                                                                                                                                                                                                                                                                                                |
| <b>REDCap Variable Name</b> | akt_variant_2_sample_1                                                                                                                                                                                                                                                                                                                                                                                                                                              |
| <b>Field Type</b>           | text                                                                                                                                                                                                                                                                                                                                                                                                                                                                |
|                             | The data for this field may be imported using the center's GENIE submission; if this does not occur, the data should be entered by the data abstractor.<br><br>This section is to capture if a rare patient with an AKT1 E17K mutation also has another mutation in AKT1. When annotating AKT1 variants, use the cDNA nomenclature, as provided by Sage.                                                                                                            |
| <b>Directives</b>           |                                                                                                                                                                                                                                                                                                                                                                                                                                                                     |
| <b>Identifier?</b>          | N                                                                                                                                                                                                                                                                                                                                                                                                                                                                   |
| <b>Required Field?</b>      | N                                                                                                                                                                                                                                                                                                                                                                                                                                                                   |
| <b>Field Label</b>          | <b>ERBB2 Mutation Status</b>                                                                                                                                                                                                                                                                                                                                                                                                                                        |

# Data Abstraction Guide: GENIE AKT1 Breast Cancer Project

|                             |                                                                                                                                                         |
|-----------------------------|---------------------------------------------------------------------------------------------------------------------------------------------------------|
| <b>REDCap Variable Name</b> | erbb2_mutation_status_1                                                                                                                                 |
| <b>Field Type</b>           | dropdown                                                                                                                                                |
| <b>Choice List</b>          | 1, Mutant   2, Wildtype   99, UNK                                                                                                                       |
| <b>Directives</b>           | The data for this field may be imported using the center's GENIE submission; if this does not occur, the data should be entered by the data abstractor. |
| <b>Identifier?</b>          | N                                                                                                                                                       |
| <b>Required Field?</b>      | N                                                                                                                                                       |
| <b>Field Label</b>          | <b>ERBB2 Variant</b>                                                                                                                                    |
| <b>REDCap Variable Name</b> | erbb2_variant_1                                                                                                                                         |
| <b>Field Type</b>           | text                                                                                                                                                    |
| <b>Choice List</b>          | The data for this field may be imported using the center's GENIE submission; if this does not occur, the data should be entered by the data abstractor. |
| <b>Directives</b>           |                                                                                                                                                         |
| <b>Identifier?</b>          | N                                                                                                                                                       |
| <b>Required Field?</b>      | N                                                                                                                                                       |
| <b>Field Label</b>          | <b>ESR1 Mutation Status</b>                                                                                                                             |
| <b>REDCap Variable Name</b> | esr1_mutation_status_1                                                                                                                                  |
| <b>Field Type</b>           | dropdown                                                                                                                                                |
| <b>Choice List</b>          | 1, Mutant   2, Wildtype   99, UNK                                                                                                                       |
| <b>Directives</b>           | The data for this field may be imported using the center's GENIE submission; if this does not occur, the data should be entered by the data abstractor. |
| <b>Identifier?</b>          | N                                                                                                                                                       |
| <b>Required Field?</b>      | N                                                                                                                                                       |
| <b>Field Label</b>          | <b>ESR1 Variant</b>                                                                                                                                     |
| <b>REDCap Variable Name</b> | esr1_variant_1                                                                                                                                          |
| <b>Field Type</b>           | text                                                                                                                                                    |
| <b>Directives</b>           | The data for this field may be imported using the center's GENIE submission; if this does not occur, the data should be entered by the data abstractor. |
| <b>Identifier?</b>          | N                                                                                                                                                       |
| <b>Required Field?</b>      | N                                                                                                                                                       |
| <b>Field Label</b>          | <b>PIK3CA Mutation Status</b>                                                                                                                           |
| <b>REDCap Variable Name</b> | pik3ca_mutation_status_1                                                                                                                                |
| <b>Field Type</b>           | dropdown                                                                                                                                                |



# Data Abstraction Guide: GENIE AKT1 Breast Cancer Project

|                             |                                                                                                                                                                                                                                                                                                                                                                                                                                                                              |
|-----------------------------|------------------------------------------------------------------------------------------------------------------------------------------------------------------------------------------------------------------------------------------------------------------------------------------------------------------------------------------------------------------------------------------------------------------------------------------------------------------------------|
| <b>Choice List</b>          | 1, Mutant   2, Wildtype   99, UNK                                                                                                                                                                                                                                                                                                                                                                                                                                            |
| <b>Directives</b>           | The data for this field may be imported using the center’s GENIE submission; if this does not occur, the data should be entered by the data abstractor.                                                                                                                                                                                                                                                                                                                      |
| <b>Identifier?</b>          | N                                                                                                                                                                                                                                                                                                                                                                                                                                                                            |
| <b>Required Field?</b>      | N                                                                                                                                                                                                                                                                                                                                                                                                                                                                            |
| <b>Field Label</b>          | <b>PIK3CA Variant</b>                                                                                                                                                                                                                                                                                                                                                                                                                                                        |
| <b>REDCap Variable Name</b> | pik3ca_variant_1                                                                                                                                                                                                                                                                                                                                                                                                                                                             |
| <b>Field Type</b>           | text                                                                                                                                                                                                                                                                                                                                                                                                                                                                         |
| <b>Directives</b>           | The data for this field may be imported using the center’s GENIE submission; if this does not occur, the data should be entered by the data abstractor.                                                                                                                                                                                                                                                                                                                      |
| <b>Identifier?</b>          | N                                                                                                                                                                                                                                                                                                                                                                                                                                                                            |
| <b>Required Field?</b>      | N                                                                                                                                                                                                                                                                                                                                                                                                                                                                            |
| <b>Field Label</b>          | <b>Was another (breast cancer) sample sequenced in this patient?</b>                                                                                                                                                                                                                                                                                                                                                                                                         |
| <b>REDCap Variable Name</b> | sampleseq2_yn                                                                                                                                                                                                                                                                                                                                                                                                                                                                |
| <b>Field Type</b>           | yesno                                                                                                                                                                                                                                                                                                                                                                                                                                                                        |
| <b>Directives</b>           | <p>If the patient has another breast cancer sample sequenced, record ‘Yes.’ This could be the primary breast tumor or metastases from the breast cancer.</p> <p>A ‘Yes’ will activate data fields for Sample 2.</p> <p>If the patient has no other samples, record ‘No.’</p> <p>If the patient has another sample with a non breast cancer OncoTree code (for e.g if the patient also has a separate lung cancer or sarcoma etc, record ‘No.’</p> <p>Do not leave blank.</p> |
| <b>Identifier?</b>          | N                                                                                                                                                                                                                                                                                                                                                                                                                                                                            |
| <b>Required Field?</b>      | N                                                                                                                                                                                                                                                                                                                                                                                                                                                                            |

# Data Abstraction Guide: GENIE AKT1 Breast Cancer Project

---

## TREATMENT REGIMENS

Abstraction Notes:

1. Cancer directed drug therapies will be entered into different sections according to disease state:
  - a. Primary Diagnosis Treatment with details on hormone therapy
  - b. LRR Treatment with details on hormone therapy
  - c. Metastatic Diagnosis Therapy with details on chemotherapy
2. Each single drug should be entered separately, even if it was administered as part of a regimen.

### Primary Diagnosis: Treatment Regimen

1. Use the EMR to look for cancer-directed drug therapies; use the Medications and the provider notes to locate the details of drug therapies.
2. The receipt of chemotherapy will be recorded, but the actual chemotherapies will not be recorded.
3. The receipt of hormone therapy will be recorded, and the actual hormone therapies will be recorded; up to three drugs can be entered,
4. The data guide will provide directives for the first treatment; subsequent treatments will be similar.

# Data Abstraction Guide: GENIE AKT1 Breast Cancer Project

**Treatment Regimens** Re-assign this record to another Data Access Group? DFC ▼

✎ Editing existing Record ID 1 - 1a

Record ID 1

Was Chemotherapy (CT) received after primary diagnosis date but before LRR or distant metastatic date?  Yes ▼

Was Hormone therapy (HT) received after primary diagnosis date but before LRR or distant metastatic date?  Yes ▼

**DIRECTIONS:**

- IF APPROXIMATED BY 15, USE FIRST OF THE MONTH AS DEFAULT.
- IF DRUG HAS NOT BEEN DISCONTINUED, ENTER DATE THE DRUG WAS LAST ADMINISTERED.
- IF A PATIENT HAS HAD A "TREATMENT BREAK" - WHEREBY THEY START, STOP (FOR <=3 MONTHS) AND THEN RE-START THE SAME DRUG, ONLY RECORD START AND FINAL STOP DATE FOR THAT DRUG.
- IF MULTIPLE REASONS EXIST FOR DRUG DISCONTINUATION, POD TAKES PRECEDENCE

Primary Diagnosis: Treatment Regimen 1

Was this administered as part of a combination therapy with ovarian suppression or other?  Yes  
 No reset

Therapy 1:  ▼

Therapy 1 Start Date:  Today M-D-Y  
PLEASE ENTER DATE IN MM - DD - YYYY FORMAT!

Therapy 1 Start Interval:  View equation

Therapy 1 End Date:  Today M-D-Y  
PLEASE ENTER DATE IN MM - DD - YYYY FORMAT!

Therapy 1 End Interval:  View equation

Was drug discontinued  Yes  
 No reset

|                             |                                                                                                                                                                                 |
|-----------------------------|---------------------------------------------------------------------------------------------------------------------------------------------------------------------------------|
| <b>Field Label</b>          | <b>Was Chemotherapy (CT) received after primary diagnosis date but before LRR or distant metastatic date?</b>                                                                   |
| <b>REDCap Variable Name</b> | chemo_therapy_postdx                                                                                                                                                            |
| <b>Field Type</b>           | dropdown                                                                                                                                                                        |
| <b>Choice List</b>          | 1, Yes   0, No   99, UNK                                                                                                                                                        |
| <b>Directives</b>           | If the patient received CT after the primary diagnosis but before LRR, record '1, Yes.'<br>If the patient did not receive CT after the primary diagnosis but before LRR, record |

# Data Abstraction Guide: GENIE AKT1 Breast Cancer Project

|                      |                                                                                                                                                                                                                                                                                                                                                                                                                                    |
|----------------------|------------------------------------------------------------------------------------------------------------------------------------------------------------------------------------------------------------------------------------------------------------------------------------------------------------------------------------------------------------------------------------------------------------------------------------|
|                      | <p>'No.'</p> <p>In the case that a patient transfers care to your center after the primary diagnosis and it is not certain that the patient receive CT, record '99, UNK.'</p>                                                                                                                                                                                                                                                      |
| Identifier?          | N                                                                                                                                                                                                                                                                                                                                                                                                                                  |
| Required Field?      | N                                                                                                                                                                                                                                                                                                                                                                                                                                  |
| Field Label          | <b>Was Hormone therapy (HT) received after primary diagnosis date but before LRR or distant metastatic date?</b>                                                                                                                                                                                                                                                                                                                   |
| REDCap Variable Name | hormo_therapy_postdx                                                                                                                                                                                                                                                                                                                                                                                                               |
| Field Type           | dropdown                                                                                                                                                                                                                                                                                                                                                                                                                           |
| Choice List          | 1, Yes   0, No   99, UNK                                                                                                                                                                                                                                                                                                                                                                                                           |
| Directives           | <p>If the patient received HT after the primary diagnosis but before LRR, record '1, Yes.'</p> <p>If the patient did not receive HT after the primary diagnosis but before LRR, record 'No.'</p> <p>In the case that a patient transfers care to your center after the primary diagnosis and it is not certain that the patient receive HT, record '99, UNK.'</p>                                                                  |
| Identifier?          | N                                                                                                                                                                                                                                                                                                                                                                                                                                  |
| Required Field?      | N                                                                                                                                                                                                                                                                                                                                                                                                                                  |
| Field Label          | <b>Was this administered as part of a combination therapy with ovarian suppression or other?</b>                                                                                                                                                                                                                                                                                                                                   |
| REDCap Variable Name | combo_therapy1_yn                                                                                                                                                                                                                                                                                                                                                                                                                  |
| Field Type           | yesno                                                                                                                                                                                                                                                                                                                                                                                                                              |
| Directives           | <p>Linked to <i>Was Hormone therapy (HT) received after primary diagnosis date but before LRR or distant metastatic date?</i> If the response is 'Yes' then <i>Was this administered as part of a combination therapy with ovarian suppression or other?</i> becomes active.</p> <p>If the hormone therapy was administered with ovarian suppression or similar, record 'Yes.' If not, record 'No.'</p> <p>Do not leave blank.</p> |
| Identifier?          | N                                                                                                                                                                                                                                                                                                                                                                                                                                  |
| Required Field?      | N                                                                                                                                                                                                                                                                                                                                                                                                                                  |
| Field Label          | <b>Therapy 1</b>                                                                                                                                                                                                                                                                                                                                                                                                                   |
| REDCap Variable Name | hormone_1                                                                                                                                                                                                                                                                                                                                                                                                                          |
| Field Type           | dropdown                                                                                                                                                                                                                                                                                                                                                                                                                           |
| Choice List          | 1, Ovarian suppression/ablation therapyv (Leuprolide/Goserelin/ BSO)   2, Anastrozole   3, Letrozole   4, Exemestane   5, Fulvestrant   6, Tamoxifen   7,                                                                                                                                                                                                                                                                          |

# Data Abstraction Guide: GENIE AKT1 Breast Cancer Project

|                             |                                                                                                                                                                                                                                                                                                                                                                                                                                                                                                    |
|-----------------------------|----------------------------------------------------------------------------------------------------------------------------------------------------------------------------------------------------------------------------------------------------------------------------------------------------------------------------------------------------------------------------------------------------------------------------------------------------------------------------------------------------|
|                             | Toremifene   8, Megestrol acetate   9, Flouxymesterone   10, Ethinyl estradiol   98, Other                                                                                                                                                                                                                                                                                                                                                                                                         |
|                             | Linked to <b><i>Was Hormone therapy (HT) received after primary diagnosis date but before LRR or distant metastatic date?</i></b> If the response is 'Yes' then <b><i>Therapy 1</i></b> becomes active.<br><br>Choose the hormone therapy received by the patient from the drop-down list. If the hormone therapy is not listed, record '98, Other.' If the drug is not listed, record its name. In rare instances, patients may receive hormone therapy in combination with a non-hormonal agent. |
| <b>Directives</b>           | Do not leave blank.                                                                                                                                                                                                                                                                                                                                                                                                                                                                                |
| <b>Identifier?</b>          | N                                                                                                                                                                                                                                                                                                                                                                                                                                                                                                  |
| <b>Required Field?</b>      | N                                                                                                                                                                                                                                                                                                                                                                                                                                                                                                  |
| <b>Field Label</b>          | <b>Was this administered as part of the clinical trial?</b>                                                                                                                                                                                                                                                                                                                                                                                                                                        |
| <b>REDCap Variable Name</b> | hormone1_clintrial                                                                                                                                                                                                                                                                                                                                                                                                                                                                                 |
| <b>Field Type</b>           | yesno                                                                                                                                                                                                                                                                                                                                                                                                                                                                                              |
|                             | Linked to <b><i>Was Hormone therapy (HT) received after primary diagnosis date but before LRR or distant metastatic date?</i></b> If the response is 'Yes' then <b><i>Was this administered as part of the clinical trial?</i></b> becomes active<br><br>Record 'Yes' if the hormone therapy was administered as a part of a clinical trial. Please note that it is not necessary for the hormone therapy to be evaluated in the trial in order to record 'Yes.'                                   |
| <b>Directives</b>           |                                                                                                                                                                                                                                                                                                                                                                                                                                                                                                    |
| <b>Identifier?</b>          | N                                                                                                                                                                                                                                                                                                                                                                                                                                                                                                  |
| <b>Required Field?</b>      | N                                                                                                                                                                                                                                                                                                                                                                                                                                                                                                  |
| <b>Field Label</b>          | <b>Therapy 1, Specify</b>                                                                                                                                                                                                                                                                                                                                                                                                                                                                          |
| <b>REDCap Variable Name</b> | hormone1_other                                                                                                                                                                                                                                                                                                                                                                                                                                                                                     |
| <b>Field Type</b>           | text                                                                                                                                                                                                                                                                                                                                                                                                                                                                                               |
|                             | Linked to <b><i>Was Hormone therapy (HT) received after primary diagnosis date but before LRR or distant metastatic date?</i></b> If the response is 'Yes' then <b><i>Therapy1, Specify</i></b> becomes active.<br><br>Linked to <b><i>Therapy 1</i></b> . If the response is '98, Other' record the hormone therapy that is not listed in the drop-down list. Please make sure that the drug recorded is an actual hormone therapy.                                                               |
| <b>Directives</b>           |                                                                                                                                                                                                                                                                                                                                                                                                                                                                                                    |
| <b>Identifier?</b>          | N                                                                                                                                                                                                                                                                                                                                                                                                                                                                                                  |
| <b>Required Field?</b>      | N                                                                                                                                                                                                                                                                                                                                                                                                                                                                                                  |
| <b>Field Label</b>          | <b>Therapy 1 Start Date</b>                                                                                                                                                                                                                                                                                                                                                                                                                                                                        |
| <b>REDCap Variable Name</b> | hormo1_start                                                                                                                                                                                                                                                                                                                                                                                                                                                                                       |

# Data Abstraction Guide: GENIE AKT1 Breast Cancer Project

|                             |                                                                                                                                                                                                                                                                                                                                                                                                                                                                                                                                                                                                                                                                                                                                                                                                                                                                                                                                                                                                                                                                                                                                                                                                               |
|-----------------------------|---------------------------------------------------------------------------------------------------------------------------------------------------------------------------------------------------------------------------------------------------------------------------------------------------------------------------------------------------------------------------------------------------------------------------------------------------------------------------------------------------------------------------------------------------------------------------------------------------------------------------------------------------------------------------------------------------------------------------------------------------------------------------------------------------------------------------------------------------------------------------------------------------------------------------------------------------------------------------------------------------------------------------------------------------------------------------------------------------------------------------------------------------------------------------------------------------------------|
| <b>Field Type</b>           | text                                                                                                                                                                                                                                                                                                                                                                                                                                                                                                                                                                                                                                                                                                                                                                                                                                                                                                                                                                                                                                                                                                                                                                                                          |
| <b>Valid Field</b>          | mm-dd-yyyy                                                                                                                                                                                                                                                                                                                                                                                                                                                                                                                                                                                                                                                                                                                                                                                                                                                                                                                                                                                                                                                                                                                                                                                                    |
|                             | <p>Linked to <b><i>Was Hormone therapy (HT) received after primary diagnosis date but before LRR or distant metastatic date?</i></b> If the response is 'Yes' then <b><i>Therapy 1, Start Date</i></b> becomes active.</p> <p>Record the date that the drug was first administered to the patient.</p> <p>Note for oral medications: If the first date of administration is not known, record the date the drug was prescribed or ordered or recorded in medical notes as date of therapy initiation.</p> <p>If the full date is not known, estimate the date on using the components that are known.</p> <ul style="list-style-type: none"> <li>• If month and year of the date is known, and the day of the month is not known, record 15 for the day.</li> <li>• If year of the date is known, and the day and month is not known, record 6 (June) for the month and 15 for the day.</li> <li>• If the year is known, and the seasons are noted rather than the month and day, use the following: <ul style="list-style-type: none"> <li>○ For winter use January (1)</li> <li>○ For spring use April (4)</li> <li>○ For summer use July (7)</li> <li>○ For autumn use October (10)</li> </ul> </li> </ul> |
| <b>Directives</b>           | Do not leave blank.                                                                                                                                                                                                                                                                                                                                                                                                                                                                                                                                                                                                                                                                                                                                                                                                                                                                                                                                                                                                                                                                                                                                                                                           |
| <b>Identifier?</b>          | Y; this data element will not be shared with MSK. It will be used to calculate the interval in days.                                                                                                                                                                                                                                                                                                                                                                                                                                                                                                                                                                                                                                                                                                                                                                                                                                                                                                                                                                                                                                                                                                          |
| <b>Required Field?</b>      | N                                                                                                                                                                                                                                                                                                                                                                                                                                                                                                                                                                                                                                                                                                                                                                                                                                                                                                                                                                                                                                                                                                                                                                                                             |
| <b>Field Label</b>          | <b>Therapy 1 Start Interval</b>                                                                                                                                                                                                                                                                                                                                                                                                                                                                                                                                                                                                                                                                                                                                                                                                                                                                                                                                                                                                                                                                                                                                                                               |
| <b>REDCap Variable Name</b> | hormo1_start_int                                                                                                                                                                                                                                                                                                                                                                                                                                                                                                                                                                                                                                                                                                                                                                                                                                                                                                                                                                                                                                                                                                                                                                                              |
| <b>Field Type</b>           | Calculated: datediff([dob_date],[reg2_hormo1_start],'d', 'mdy', false)                                                                                                                                                                                                                                                                                                                                                                                                                                                                                                                                                                                                                                                                                                                                                                                                                                                                                                                                                                                                                                                                                                                                        |
|                             | <p>Linked to <b><i>Was Hormone therapy (HT) received after primary diagnosis date but before LRR or distant metastatic date?</i></b> If the response is 'Yes' then <b><i>Therapy 1, Start Date Interval</i></b> becomes active.</p> <p>Dependent upon <b><i>Therapy1 Start Date</i></b>.</p> <p>If the <b><i>Therapy1 Start Date</i></b> was entered, REDCap will calculate this field by subtracting the <b><i>Date of Birth</i></b> from the <b><i>Therapy1 Start Date</i></b>.</p>                                                                                                                                                                                                                                                                                                                                                                                                                                                                                                                                                                                                                                                                                                                         |
| <b>Directives</b>           | If the <b><i>Therapy1 Start Date</i></b> was not entered, this data field will remain blank.                                                                                                                                                                                                                                                                                                                                                                                                                                                                                                                                                                                                                                                                                                                                                                                                                                                                                                                                                                                                                                                                                                                  |
| <b>Identifier?</b>          | N                                                                                                                                                                                                                                                                                                                                                                                                                                                                                                                                                                                                                                                                                                                                                                                                                                                                                                                                                                                                                                                                                                                                                                                                             |

# Data Abstraction Guide: GENIE AKT1 Breast Cancer Project

|                      |                                                                                                                                                                                                                                                                                                                                                                                                                                                                                                                                                                                                                                                                                                                                                                                                                                                                                                                                                                                                                                                                                                                                                                                                                                                                                                                                                                                                                                                                                                                                                                                                                                                                                                                                                                                                                                                                                                                                                                                                               |
|----------------------|---------------------------------------------------------------------------------------------------------------------------------------------------------------------------------------------------------------------------------------------------------------------------------------------------------------------------------------------------------------------------------------------------------------------------------------------------------------------------------------------------------------------------------------------------------------------------------------------------------------------------------------------------------------------------------------------------------------------------------------------------------------------------------------------------------------------------------------------------------------------------------------------------------------------------------------------------------------------------------------------------------------------------------------------------------------------------------------------------------------------------------------------------------------------------------------------------------------------------------------------------------------------------------------------------------------------------------------------------------------------------------------------------------------------------------------------------------------------------------------------------------------------------------------------------------------------------------------------------------------------------------------------------------------------------------------------------------------------------------------------------------------------------------------------------------------------------------------------------------------------------------------------------------------------------------------------------------------------------------------------------------------|
| Required Field?      | N                                                                                                                                                                                                                                                                                                                                                                                                                                                                                                                                                                                                                                                                                                                                                                                                                                                                                                                                                                                                                                                                                                                                                                                                                                                                                                                                                                                                                                                                                                                                                                                                                                                                                                                                                                                                                                                                                                                                                                                                             |
| Field Label          | <b>Therapy 1 End Date</b>                                                                                                                                                                                                                                                                                                                                                                                                                                                                                                                                                                                                                                                                                                                                                                                                                                                                                                                                                                                                                                                                                                                                                                                                                                                                                                                                                                                                                                                                                                                                                                                                                                                                                                                                                                                                                                                                                                                                                                                     |
| REDCap Variable Name | hormo1_end                                                                                                                                                                                                                                                                                                                                                                                                                                                                                                                                                                                                                                                                                                                                                                                                                                                                                                                                                                                                                                                                                                                                                                                                                                                                                                                                                                                                                                                                                                                                                                                                                                                                                                                                                                                                                                                                                                                                                                                                    |
| Valid Field          | mm-dd-yyyy                                                                                                                                                                                                                                                                                                                                                                                                                                                                                                                                                                                                                                                                                                                                                                                                                                                                                                                                                                                                                                                                                                                                                                                                                                                                                                                                                                                                                                                                                                                                                                                                                                                                                                                                                                                                                                                                                                                                                                                                    |
| Choice List          | text                                                                                                                                                                                                                                                                                                                                                                                                                                                                                                                                                                                                                                                                                                                                                                                                                                                                                                                                                                                                                                                                                                                                                                                                                                                                                                                                                                                                                                                                                                                                                                                                                                                                                                                                                                                                                                                                                                                                                                                                          |
|                      | <p>Record the last date that the patient received the medication.</p> <p>If the actual last date that the drug was administered is not documented, record the date that the provider stated was the last date of administration in the EMR.</p> <p>If a patient leaves your institutional care and you are no longer certain of when a therapy was discontinued, enter the last known date of therapy administration at your institution.</p> <p>If a drug has not been discontinued, enter the date that the drug was last administered at the time of data abstraction.</p> <p>If a patient has a treatment break or holiday, whereby she starts a hormone therapy and stops the drug for less than or equal to 3 months (90 days) and then re-starts the same medication, record the first start date for <b>Therapy 1 Start Date</b> and the final end date for the therapy as <b>Therapy 1 End Date</b>.</p> <p>If a patient has a treatment break or holiday, whereby she starts a hormone therapy and stops the drug for greater than 3 months (90 days) and then re-starts the same medication, record the first start date and the first end date for <b>Therapy 1 End Date</b>; record the same drug in <b>Therapy 2</b> with the second start date and the final end date for the therapy.</p> <p>If the full date is not known, estimate the date on using the components that are known.</p> <ul style="list-style-type: none"> <li>• If month and year of the date is known, and the day of the month is not known, record 15 for the day.</li> <li>• If year of the date is known, and the day and month is not known, record 6 (June) for the month and 15 for the day.</li> <li>• If the year is known, and the seasons are noted rather than the month and day, use the following: <ul style="list-style-type: none"> <li>○ For winter use January (1)</li> <li>○ For spring use April (4)</li> <li>○ For summer use July (7)</li> <li>○ For autumn use October (10)</li> </ul> </li> </ul> |
| Directives           | Do not leave blank.                                                                                                                                                                                                                                                                                                                                                                                                                                                                                                                                                                                                                                                                                                                                                                                                                                                                                                                                                                                                                                                                                                                                                                                                                                                                                                                                                                                                                                                                                                                                                                                                                                                                                                                                                                                                                                                                                                                                                                                           |
| Identifier?          | Y; this data element will not be shared with MSK. It will be used to calculate the interval in days.                                                                                                                                                                                                                                                                                                                                                                                                                                                                                                                                                                                                                                                                                                                                                                                                                                                                                                                                                                                                                                                                                                                                                                                                                                                                                                                                                                                                                                                                                                                                                                                                                                                                                                                                                                                                                                                                                                          |
| Required Field?      | N                                                                                                                                                                                                                                                                                                                                                                                                                                                                                                                                                                                                                                                                                                                                                                                                                                                                                                                                                                                                                                                                                                                                                                                                                                                                                                                                                                                                                                                                                                                                                                                                                                                                                                                                                                                                                                                                                                                                                                                                             |

# Data Abstraction Guide: GENIE AKT1 Breast Cancer Project

|                             |                                                                                                                                                                                                                                                                                                                                                                                                                                                                |
|-----------------------------|----------------------------------------------------------------------------------------------------------------------------------------------------------------------------------------------------------------------------------------------------------------------------------------------------------------------------------------------------------------------------------------------------------------------------------------------------------------|
| <b>Field Label</b>          | <b>Therapy 1 End Interval</b>                                                                                                                                                                                                                                                                                                                                                                                                                                  |
| <b>REDCap Variable Name</b> | hormo1_end_int                                                                                                                                                                                                                                                                                                                                                                                                                                                 |
| <b>Field Type</b>           | Calculated: datediff([dob_date],[reg2_hormo1_start],'d', 'mdy', false)                                                                                                                                                                                                                                                                                                                                                                                         |
| <b>Directives</b>           | <p>Dependent upon <b>Therapy1 End Date</b>.</p> <p>If the <b>Therapy1 End Date</b> was entered, REDCap will calculate this field by subtracting the <b>Date of Birth</b> from the <b>Therapy1 End Date</b>.</p> <p>If the <b>Therapy1 End Date</b> was not entered, this data field will remain blank.</p>                                                                                                                                                     |
| <b>Identifier?</b>          | N                                                                                                                                                                                                                                                                                                                                                                                                                                                              |
| <b>Required Field?</b>      | N                                                                                                                                                                                                                                                                                                                                                                                                                                                              |
| <b>Field Label</b>          | <b>Was drug discontinued?</b>                                                                                                                                                                                                                                                                                                                                                                                                                                  |
| <b>REDCap Variable Name</b> | hormo1_discon_yn                                                                                                                                                                                                                                                                                                                                                                                                                                               |
| <b>Field Type</b>           | treatment_regimens                                                                                                                                                                                                                                                                                                                                                                                                                                             |
| <b>Choice List</b>          | Yesno                                                                                                                                                                                                                                                                                                                                                                                                                                                          |
| <b>Directives</b>           | <p>Record 'Yes' if the hormone therapy has been discontinued.</p> <p>If the hormone therapy has not been discontinued at the time of data abstraction, record 'No.'</p>                                                                                                                                                                                                                                                                                        |
| <b>Identifier?</b>          | N                                                                                                                                                                                                                                                                                                                                                                                                                                                              |
| <b>Required Field?</b>      | N                                                                                                                                                                                                                                                                                                                                                                                                                                                              |
| <b>Field Label</b>          | <b>Reason for Discontinuation</b>                                                                                                                                                                                                                                                                                                                                                                                                                              |
| <b>REDCap Variable Name</b> | hormo1_reason                                                                                                                                                                                                                                                                                                                                                                                                                                                  |
| <b>Field Type</b>           | Dropdown                                                                                                                                                                                                                                                                                                                                                                                                                                                       |
| <b>Choice List</b>          | 0, Completion of Planned Therapy   1, Toxicity   2, Patient Preference   3, Not Effective/Progression of Disease   99, Other/UNK                                                                                                                                                                                                                                                                                                                               |
| <b>Directives</b>           | <p>Linked to <b>Was drug discontinued?</b> If 'Yes' record the reason that the hormone therapy was discontinued.</p> <p>If 'No' leave blank.</p> <p>If a patient leaves your institutional care and you are no longer certain of when a therapy was discontinued, enter 'Lost to follow-up'.</p> <p>If multiple reason exist for drug discontinuation and one of the reasons is for disease progression, record '3, Not Effective/Progression of Disease.'</p> |
| <b>Identifier?</b>          | N                                                                                                                                                                                                                                                                                                                                                                                                                                                              |
| <b>Required Field?</b>      | N                                                                                                                                                                                                                                                                                                                                                                                                                                                              |



# Data Abstraction Guide: GENIE AKT1 Breast Cancer Project

## LRR: Treatment Regimens

1. Use the EMR to look for cancer-directed drug therapies; use the Medications and the provider notes to locate the details of drug therapies.
2. The receipt of chemotherapy following LRR will be recorded, but the actual chemotherapies will not be recorded.
3. The receipt of hormone therapy following LRR will be recorded, and the actual hormone therapies will be recorded; up to three drugs can be entered,
4. The data guide will provide directives for the first treatment in the first regimen; subsequent treatments have similar directives.

- IF DRUG HAS NOT BEEN DISCONTINUED, ENTER DATE THE DRUG WAS LAST ADMINISTERED.
- IF A PATIENT HAS HAD A "TREATMENT BREAK" - WHEREBY THEY START, STOP (FOR <=3 MONTHS) AND THEN RE-START THE SAME DRUG, ONLY RECORD START AND FINAL STOP DATE FOR THAT DRUG.
- IF MULTIPLE REASONS EXIST FOR DRUG DISCONTINUATION, POD TAKES PRECEDENCE

LRR Treatment Regimens

Was CT received after LRR date but before distant metastatic diagnosis date?

Was HT received after LRR date but before distant metastatic diagnosis date

LRR Diagnosis: Treatment Regimen 1

Was this administered as part of a combination therapy with ovarian suppression or other?   Yes  No reset

Therapy 1:

Therapy 1 Start Date:    M-D-Y  
PLEASE ENTER DATE IN MM - DD - YYYY FORMAT!

Therapy 1 Start Interval:

Therapy 1 End Date:    M-D-Y  
PLEASE ENTER DATE IN MM - DD - YYYY FORMAT!

Therapy 1 End Interval:

Was drug discontinued   Yes  No reset

|                             |                                                                                     |
|-----------------------------|-------------------------------------------------------------------------------------|
| <b>Field Label</b>          | <b>Was CT received after LRR date but before distant metastatic diagnosis date?</b> |
| <b>REDCap Variable Name</b> | lrr_chemo_therapy_postdx                                                            |
| <b>Field Type</b>           | Dropdown                                                                            |

# Data Abstraction Guide: GENIE AKT1 Breast Cancer Project

|                             |                                                                                                                                                                                                                                                                                                                                                                                   |
|-----------------------------|-----------------------------------------------------------------------------------------------------------------------------------------------------------------------------------------------------------------------------------------------------------------------------------------------------------------------------------------------------------------------------------|
| <b>Choice List</b>          | 1, Yes   0, No   99, UNK                                                                                                                                                                                                                                                                                                                                                          |
|                             | If the patient received CT following a LRR and before a diagnosis of a distant metastasis, record '1, Yes.'<br><br>If the patient did not receive CT following the LRR, record 'No.'<br><br>In the case that a patient transfers care to your center after the LRR and it is not certain that the patient receive CT following the LRR, record '99, UNK.'                         |
| <b>Directives</b>           |                                                                                                                                                                                                                                                                                                                                                                                   |
| <b>Identifier?</b>          | N                                                                                                                                                                                                                                                                                                                                                                                 |
| <b>Required Field?</b>      | N                                                                                                                                                                                                                                                                                                                                                                                 |
| <b>Field Label</b>          | <b>Was HT received after LRR date but before distant metastatic diagnosis date?</b>                                                                                                                                                                                                                                                                                               |
| <b>REDCap Variable Name</b> | lrr_hormo_therapy_postdx                                                                                                                                                                                                                                                                                                                                                          |
| <b>Field Type</b>           | Dropdown                                                                                                                                                                                                                                                                                                                                                                          |
| <b>Choice List</b>          | 1, Yes   0, No   99, UNK                                                                                                                                                                                                                                                                                                                                                          |
|                             | If the patient received HT following a LRR, record '1, Yes.'<br><br>If the patient did not receive HT following the LRR, record 'No.'<br><br>In the case that a patient transfers care to your center after the LRR and it is not certain that the patient receive HT following the LRR, record '99, UNK.'                                                                        |
| <b>Directives</b>           |                                                                                                                                                                                                                                                                                                                                                                                   |
| <b>Identifier?</b>          | N                                                                                                                                                                                                                                                                                                                                                                                 |
| <b>Required Field?</b>      | N                                                                                                                                                                                                                                                                                                                                                                                 |
| <b>Field Label</b>          | <b>Was this administered as part of a combination therapy with ovarian suppression or other?</b>                                                                                                                                                                                                                                                                                  |
| <b>REDCap Variable Name</b> | lrr_combo_therapy1_yn                                                                                                                                                                                                                                                                                                                                                             |
| <b>Field Type</b>           | Yesno                                                                                                                                                                                                                                                                                                                                                                             |
|                             | Linked to <b><i>Was HT received after LRR date but before distant metastatic diagnosis date?</i></b> If the response is 'Yes' then <b><i>Was this administered as part of a combination therapy with ovarian suppression or other?</i></b> becomes active.<br><br>If the hormone therapy was administered with ovarian suppression or similar, record 'Yes.' If not, record 'No.' |
| <b>Directives</b>           | Do not leave blank.                                                                                                                                                                                                                                                                                                                                                               |
| <b>Identifier?</b>          | N                                                                                                                                                                                                                                                                                                                                                                                 |
| <b>Required Field?</b>      | N                                                                                                                                                                                                                                                                                                                                                                                 |
| <b>Field Label</b>          | <b>Therapy 1</b>                                                                                                                                                                                                                                                                                                                                                                  |
| <b>REDCap Variable Name</b> | lrr_hormone_1                                                                                                                                                                                                                                                                                                                                                                     |
| <b>Field Type</b>           | Dropdown                                                                                                                                                                                                                                                                                                                                                                          |
| <b>Choice List</b>          | 1, Ovarian suppression/ablation therapyv (Leuprolide/Goserelin/ BSO)   2, Anastrozole   3, Letrozole   4, Exemestane   5, Fulvestrant   6, Tamoxifen   7,                                                                                                                                                                                                                         |

# Data Abstraction Guide: GENIE AKT1 Breast Cancer Project

|                             |                                                                                                                                                                                                                                                                                                                                                                                                                                              |
|-----------------------------|----------------------------------------------------------------------------------------------------------------------------------------------------------------------------------------------------------------------------------------------------------------------------------------------------------------------------------------------------------------------------------------------------------------------------------------------|
|                             | Toremifene   8, Megestrol acetate   9, Fluoxymesterone   10, Ethinyl estradiol   98, Other                                                                                                                                                                                                                                                                                                                                                   |
|                             | Linked to <b><i>Was HT received after LRR date but before distant metastatic diagnosis date?</i></b> If the response is 'Yes' then <b><i>Therapy 1</i></b> becomes active.<br><br>Choose the hormone therapy received by the patient from the drop-down list. If the hormone therapy is not listed, record '98, Other.' If the drug is not listed, please make sure that it is a hormone therapy. If it is not, do not record in this field. |
| <b>Directives</b>           | Do not leave blank.                                                                                                                                                                                                                                                                                                                                                                                                                          |
| <b>Identifier?</b>          | N                                                                                                                                                                                                                                                                                                                                                                                                                                            |
| <b>Required Field?</b>      | N                                                                                                                                                                                                                                                                                                                                                                                                                                            |
| <b>Field Label</b>          | <b>Was this administered as part of the clinical trial?</b>                                                                                                                                                                                                                                                                                                                                                                                  |
| <b>REDCap Variable Name</b> | lrr_hormone1_clintrial                                                                                                                                                                                                                                                                                                                                                                                                                       |
| <b>Field Type</b>           | Yesno                                                                                                                                                                                                                                                                                                                                                                                                                                        |
|                             | Linked to <b><i>Was HT received after LRR date but before distant metastatic diagnosis date?</i></b> If the response is 'Yes' then <b><i>Was this administered as part of the clinical trial?</i></b> becomes active.<br><br>Record 'Yes' if the hormone therapy was administered as a part of a clinical trial. Please note that it is not necessary for the hormone therapy to be evaluated in the trial in order to record 'Yes.'         |
| <b>Directives</b>           |                                                                                                                                                                                                                                                                                                                                                                                                                                              |
| <b>Identifier?</b>          | N                                                                                                                                                                                                                                                                                                                                                                                                                                            |
| <b>Required Field?</b>      | N                                                                                                                                                                                                                                                                                                                                                                                                                                            |
| <b>Field Label</b>          | <b>Therapy 1, Specify</b>                                                                                                                                                                                                                                                                                                                                                                                                                    |
| <b>REDCap Variable Name</b> | lrr_hormone1_other                                                                                                                                                                                                                                                                                                                                                                                                                           |
| <b>Field Type</b>           | Text                                                                                                                                                                                                                                                                                                                                                                                                                                         |
|                             | Linked to <b><i>Was HT received after LRR date but before distant metastatic diagnosis date?</i></b> If the response is 'Yes' then <b><i>Therapy1, Specify</i></b> becomes active.<br><br>Linked to <b><i>Therapy 1</i></b> . If the response is '98, Other' record the hormone therapy that is not listed in the drop-down list. Please make sure that the drug recorded is an actual hormone therapy.                                      |
| <b>Directives</b>           |                                                                                                                                                                                                                                                                                                                                                                                                                                              |
| <b>Identifier?</b>          | N                                                                                                                                                                                                                                                                                                                                                                                                                                            |
| <b>Required Field?</b>      | N                                                                                                                                                                                                                                                                                                                                                                                                                                            |
| <b>Field Label</b>          | <b>Therapy 1 Start Date</b>                                                                                                                                                                                                                                                                                                                                                                                                                  |
| <b>REDCap Variable Name</b> | lrr_hormo1_start                                                                                                                                                                                                                                                                                                                                                                                                                             |
| <b>Field Type</b>           | Text                                                                                                                                                                                                                                                                                                                                                                                                                                         |
| <b>Valid Field</b>          | mm-dd-yyyy                                                                                                                                                                                                                                                                                                                                                                                                                                   |
| <b>Directives</b>           | Linked to <b><i>Was HT received after LRR date but before distant metastatic diagnosis</i></b>                                                                                                                                                                                                                                                                                                                                               |

# Data Abstraction Guide: GENIE AKT1 Breast Cancer Project

|                             |                                                                                                                                                                                                                                                                                                                                                                                                                                                                                                                                                                                                                                                                                                                                                                                                                                                                                                                                                                                                                                                                                                                                |
|-----------------------------|--------------------------------------------------------------------------------------------------------------------------------------------------------------------------------------------------------------------------------------------------------------------------------------------------------------------------------------------------------------------------------------------------------------------------------------------------------------------------------------------------------------------------------------------------------------------------------------------------------------------------------------------------------------------------------------------------------------------------------------------------------------------------------------------------------------------------------------------------------------------------------------------------------------------------------------------------------------------------------------------------------------------------------------------------------------------------------------------------------------------------------|
|                             | <p><b>date?</b> If the response is 'Yes' then <b>Therapy 1, Start Date</b> becomes active.</p> <p>Record the date that the drug was first administered to the patient.</p> <p><u>Note for oral medications:</u> If the first date of administration is not known, record the date the drug was prescribed or ordered or ordered in medical notes as date of therapy initiation.</p> <p>If the full date is not known, estimate the date on using the components that are known.</p> <ul style="list-style-type: none"> <li>• If month and year of the date is known, and the day of the month is not known, record 15 for the day.</li> <li>• If year of the date is known, and the day and month is not known, record 6 (June) for the month and 15 for the day.</li> <li>• If the year is known, and the seasons are noted rather than the month and day, use the following:             <ul style="list-style-type: none"> <li>○ For winter use January (1)</li> <li>○ For spring use April (4)</li> <li>○ For summer use July (7)</li> <li>○ For autumn use October (10)</li> </ul> </li> </ul> <p>Do not leave blank.</p> |
| <b>Identifier?</b>          | Y; this data element will not be shared with MSK. It will be used to calculate the interval in days.                                                                                                                                                                                                                                                                                                                                                                                                                                                                                                                                                                                                                                                                                                                                                                                                                                                                                                                                                                                                                           |
| <b>Required Field?</b>      | N                                                                                                                                                                                                                                                                                                                                                                                                                                                                                                                                                                                                                                                                                                                                                                                                                                                                                                                                                                                                                                                                                                                              |
| <b>Field Label</b>          | <b>Therapy 1 Start Interval</b>                                                                                                                                                                                                                                                                                                                                                                                                                                                                                                                                                                                                                                                                                                                                                                                                                                                                                                                                                                                                                                                                                                |
| <b>REDCap Variable Name</b> | lrr_hormo1_start_int                                                                                                                                                                                                                                                                                                                                                                                                                                                                                                                                                                                                                                                                                                                                                                                                                                                                                                                                                                                                                                                                                                           |
| <b>Field Type</b>           | Calculated: datediff([dob_date],[reg2_hormo1_start],'d', 'mdy', false)                                                                                                                                                                                                                                                                                                                                                                                                                                                                                                                                                                                                                                                                                                                                                                                                                                                                                                                                                                                                                                                         |
|                             | <p>Linked to <b>Was Hormone therapy (HT) received after primary diagnosis date but before LRR or distant metastatic date?</b> If the response is 'Yes' then <b>Therapy 1, Start Date Interval</b> becomes active.</p> <p>Dependent upon <b>Therapy1 Start Date</b>.</p> <p>If the <b>Therapy1 Start Date</b> was entered, REDCap will calculate this field by subtracting the <b>Date of Birth</b> from the <b>Therapy1 Start Date</b>.</p>                                                                                                                                                                                                                                                                                                                                                                                                                                                                                                                                                                                                                                                                                    |
| <b>Directives</b>           | If the <b>Therapy1 Start Date</b> was not entered, this data field will remain blank.                                                                                                                                                                                                                                                                                                                                                                                                                                                                                                                                                                                                                                                                                                                                                                                                                                                                                                                                                                                                                                          |
| <b>Identifier?</b>          | N                                                                                                                                                                                                                                                                                                                                                                                                                                                                                                                                                                                                                                                                                                                                                                                                                                                                                                                                                                                                                                                                                                                              |
| <b>Required Field?</b>      | N                                                                                                                                                                                                                                                                                                                                                                                                                                                                                                                                                                                                                                                                                                                                                                                                                                                                                                                                                                                                                                                                                                                              |
| <b>Field Label</b>          | <b>Therapy 1 End Date</b>                                                                                                                                                                                                                                                                                                                                                                                                                                                                                                                                                                                                                                                                                                                                                                                                                                                                                                                                                                                                                                                                                                      |
| <b>REDCap Variable Name</b> | lrr_hormo1_end                                                                                                                                                                                                                                                                                                                                                                                                                                                                                                                                                                                                                                                                                                                                                                                                                                                                                                                                                                                                                                                                                                                 |
| <b>Valid Field</b>          | mm-dd-yyyy                                                                                                                                                                                                                                                                                                                                                                                                                                                                                                                                                                                                                                                                                                                                                                                                                                                                                                                                                                                                                                                                                                                     |

# Data Abstraction Guide: GENIE AKT1 Breast Cancer Project

|                 |                                                                                                                                                                                                                                                                                                                                                                                                                                                                                                                                                                                                                                                                                                                                                                                                                                                                                                                                                                                                                                                                                                                                                                                                                                                                                                                                                                                                                                                                                                                                                                                                                                                                                                                                                                                                                                                                                                                                                                                                                                                                                                                                                                                                              |
|-----------------|--------------------------------------------------------------------------------------------------------------------------------------------------------------------------------------------------------------------------------------------------------------------------------------------------------------------------------------------------------------------------------------------------------------------------------------------------------------------------------------------------------------------------------------------------------------------------------------------------------------------------------------------------------------------------------------------------------------------------------------------------------------------------------------------------------------------------------------------------------------------------------------------------------------------------------------------------------------------------------------------------------------------------------------------------------------------------------------------------------------------------------------------------------------------------------------------------------------------------------------------------------------------------------------------------------------------------------------------------------------------------------------------------------------------------------------------------------------------------------------------------------------------------------------------------------------------------------------------------------------------------------------------------------------------------------------------------------------------------------------------------------------------------------------------------------------------------------------------------------------------------------------------------------------------------------------------------------------------------------------------------------------------------------------------------------------------------------------------------------------------------------------------------------------------------------------------------------------|
| Choice List     | text                                                                                                                                                                                                                                                                                                                                                                                                                                                                                                                                                                                                                                                                                                                                                                                                                                                                                                                                                                                                                                                                                                                                                                                                                                                                                                                                                                                                                                                                                                                                                                                                                                                                                                                                                                                                                                                                                                                                                                                                                                                                                                                                                                                                         |
|                 | <p>Linked to <b>Was HT received after LRR date but before distant metastatic diagnosis date?</b> If the response is 'Yes' then <b>Therapy 1, End Date</b> becomes active.</p> <p>Record the last date that the patient received the medication.</p> <p>If the actual last date that the drug was administered is not documented, record the date that the provider stated was the last date of administration in the note.</p> <p>If a patient leaves your institutional care and you are no longer certain of when a therapy was discontinued, enter the last known date of therapy administration at your institution.</p> <p>If a drug has not been discontinued, enter the date that the drug was last administered at the time of data abstraction.</p> <p>If a patient has a treatment break or holiday, whereby she starts a hormone therapy and stops the drug for less than or equal to 3 months (90 days) and then re-starts the same medication, record the first start date for <b>Therapy 1 Start Date</b> and the final end date for the therapy as <b>Therapy 1 End Date</b>.</p> <p>If a patient has a treatment break or holiday, whereby she starts a hormone therapy and stops the drug for greater than 3 months (90 days) and then re-starts the same medication, record the first start date and and the first end date for <b>Therapy 1 End Date</b>; record the same drug in <b>Therapy 2</b> with the second start date and the final end date for the therapy.</p> <p>If the full date is not known, estimate the date on using the components that are known.</p> <ul style="list-style-type: none"> <li>• If month and year of the date is known, and the day of the month is not known, record 15 for the day.</li> <li>• If year of the date is known, and the day and month is not known, record 6 (June) for the month and 15 for the day.</li> <li>• If the year is known, and the seasons are noted rather than the month and day, use the following:             <ul style="list-style-type: none"> <li>○ For winter use January (1)</li> <li>○ For spring use April (4)</li> <li>○ For summer use July (7)</li> <li>○ For autumn use October (10)</li> </ul> </li> </ul> |
| Directives      | Do not leave blank.                                                                                                                                                                                                                                                                                                                                                                                                                                                                                                                                                                                                                                                                                                                                                                                                                                                                                                                                                                                                                                                                                                                                                                                                                                                                                                                                                                                                                                                                                                                                                                                                                                                                                                                                                                                                                                                                                                                                                                                                                                                                                                                                                                                          |
| Identifier?     | Y; this data element will not be shared with MSK. It will be used to calculate the interval in days.                                                                                                                                                                                                                                                                                                                                                                                                                                                                                                                                                                                                                                                                                                                                                                                                                                                                                                                                                                                                                                                                                                                                                                                                                                                                                                                                                                                                                                                                                                                                                                                                                                                                                                                                                                                                                                                                                                                                                                                                                                                                                                         |
| Required Field? | N                                                                                                                                                                                                                                                                                                                                                                                                                                                                                                                                                                                                                                                                                                                                                                                                                                                                                                                                                                                                                                                                                                                                                                                                                                                                                                                                                                                                                                                                                                                                                                                                                                                                                                                                                                                                                                                                                                                                                                                                                                                                                                                                                                                                            |
| Field Label     | Therapy 1 End Interval                                                                                                                                                                                                                                                                                                                                                                                                                                                                                                                                                                                                                                                                                                                                                                                                                                                                                                                                                                                                                                                                                                                                                                                                                                                                                                                                                                                                                                                                                                                                                                                                                                                                                                                                                                                                                                                                                                                                                                                                                                                                                                                                                                                       |

# Data Abstraction Guide: GENIE AKT1 Breast Cancer Project

|                             |                                                                                                                                                                                                                                                                                                                                                                                                   |
|-----------------------------|---------------------------------------------------------------------------------------------------------------------------------------------------------------------------------------------------------------------------------------------------------------------------------------------------------------------------------------------------------------------------------------------------|
| <b>REDCap Variable Name</b> | lrr_hormo1_end_int                                                                                                                                                                                                                                                                                                                                                                                |
| <b>Field Type</b>           | Calculated: datediff([dob_date],[reg2_hormo1_start],'d','mdy',false)                                                                                                                                                                                                                                                                                                                              |
|                             | Linked to <b>Was HT received after LRR date but before distant metastatic diagnosis date?</b> If the response is 'Yes' then <b>Therapy 1, End Date Interval</b> becomes active.<br><br>Dependent upon <b>Therapy1 End Date</b> .<br><br>If the <b>Therapy1 End Date</b> was entered, REDCap will calculate this field by subtracting the <b>Date of Birth</b> from the <b>Therapy1 End Date</b> . |
| <b>Directives</b>           | If the <b>Therapy1 End Date</b> was not entered, this data field will remain blank.                                                                                                                                                                                                                                                                                                               |
| <b>Identifier?</b>          | N                                                                                                                                                                                                                                                                                                                                                                                                 |
| <b>Required Field?</b>      | N                                                                                                                                                                                                                                                                                                                                                                                                 |
| <b>Field Label</b>          | <b>Was drug discontinued?</b>                                                                                                                                                                                                                                                                                                                                                                     |
| <b>REDCap Variable Name</b> | lrr_hormo1_discon_yn                                                                                                                                                                                                                                                                                                                                                                              |
| <b>Field Type</b>           | treatment_regimens                                                                                                                                                                                                                                                                                                                                                                                |
| <b>Choice List</b>          | yesno                                                                                                                                                                                                                                                                                                                                                                                             |
|                             | Linked to <b>Was HT received after LRR date but before distant metastatic diagnosis date?</b> If the response is 'Yes' then <b>Was drug discontinued</b> becomes active.<br><br>Record 'Yes' if the hormone therapy has been discontinued prior to the time of data abstraction.<br><br>If the hormone therapy has not been discontinued at the time of data abstraction, record 'No.'            |
| <b>Directives</b>           |                                                                                                                                                                                                                                                                                                                                                                                                   |
| <b>Identifier?</b>          | N                                                                                                                                                                                                                                                                                                                                                                                                 |
| <b>Required Field?</b>      | N                                                                                                                                                                                                                                                                                                                                                                                                 |
| <b>Field Label</b>          | <b>Reason for Discontinuation</b>                                                                                                                                                                                                                                                                                                                                                                 |
| <b>REDCap Variable Name</b> | lrr_hormo1_reason                                                                                                                                                                                                                                                                                                                                                                                 |
| <b>Field Type</b>           | dropdown                                                                                                                                                                                                                                                                                                                                                                                          |
| <b>Choice List</b>          | 0, Completion of Planned Therapy   1, Toxicity   2, Patient Preference   3, Not Effective/Progression of Disease   99, Other/UNK                                                                                                                                                                                                                                                                  |
|                             | Linked to <b>Was drug discontinued?</b> If 'Yes' record the reason that the hormone therapy was discontinued.<br><br>If 'No' leave blank.<br><br>If a patient leaves your institutional care and you are no longer certain of when a therapy was discontinued, enter 'Lost to follow-up'.                                                                                                         |
| <b>Directives</b>           | If multiple reason exist for drug discontinuation and one of the reasons is for disease                                                                                                                                                                                                                                                                                                           |

# Data Abstraction Guide: GENIE AKT1 Breast Cancer Project

---

|                        |                                                                |
|------------------------|----------------------------------------------------------------|
|                        | progression, record '3, Not Effective/Progression of Disease.' |
| <b>Identifier?</b>     | N                                                              |
| <b>Required Field?</b> | N                                                              |

# Data Abstraction Guide: GENIE AKT1 Breast Cancer Project

## Metastatic Diagnosis: Therapy

Abstraction Notes:

1. Record all of the drugs given in the setting of distant metastases.
2. A portion of the data fields is provided below as an example; these types of data fields will be abstracted for each cancer-directed drug therapy received by the patient.

| Metastatic Diagnosis: Therapy 1                  |                                                                                                                                   |
|--------------------------------------------------|-----------------------------------------------------------------------------------------------------------------------------------|
| Does this therapy involve a combination regimen? | <input checked="" type="radio"/> Yes<br><input type="radio"/> No<br><span style="float: right;">reset</span>                      |
| How many drugs are part of the therapy           | <input type="text"/> <span style="float: right;">▼</span>                                                                         |
| Drug 1                                           | <input type="text"/> <span style="float: right;">▼</span>                                                                         |
| Start Date                                       | <input type="text"/> <span style="float: right;">Today</span> M-D-Y<br><small>PLEASE ENTER DATE IN MM - DD - YYYY FORMAT!</small> |
| Therapy 1 Drug 1 Start Interval                  | <input type="text"/> <span style="float: right;">View equation</span>                                                             |
| End Date                                         | <input type="text"/> <span style="float: right;">Today</span> M-D-Y<br><small>PLEASE ENTER DATE IN MM - DD - YYYY FORMAT!</small> |
| Therapy 1 Drug 1 End Interval                    | <input type="text"/> <span style="float: right;">View equation</span>                                                             |
| Has this drug been discontinued?                 | <input type="radio"/> Yes<br><input type="radio"/> No<br><span style="float: right;">reset</span>                                 |
| Metastatic Diagnosis: Therapy 2                  |                                                                                                                                   |
| Does this therapy involve a combination regimen? | <input type="radio"/> Yes<br><input type="radio"/> No<br><span style="float: right;">reset</span>                                 |
| Drug 1                                           | <input type="text"/> <span style="float: right;">▼</span>                                                                         |
| Start Date                                       | <input type="text"/> <span style="float: right;">Today</span> M-D-Y<br><small>PLEASE ENTER DATE IN MM - DD - YYYY FORMAT!</small> |
| Therapy 2 Drug 1 Start Interval                  | <input type="text"/> <span style="float: right;">View equation</span>                                                             |
| End Date                                         | <input type="text"/> <span style="float: right;">Today</span> M-D-Y<br><small>PLEASE ENTER DATE IN MM - DD - YYYY FORMAT!</small> |
| Therapy 2 Drug 1 End Interval                    | <input type="text"/> <span style="float: right;">View equation</span>                                                             |
| Has this drug been discontinued?                 | <input type="radio"/> Yes<br><input type="radio"/> No<br><span style="float: right;">reset</span>                                 |
| Metastatic Diagnosis: Therapy 3                  |                                                                                                                                   |

Data Abstraction Guide for all cancer-directed drug therapies within each combination regimens for distant metastases.

| Field Label          | Does this therapy involve a combination regimen? |
|----------------------|--------------------------------------------------|
| REDCap Variable Name | therapy1_combo_yn                                |
| Field Type           | yesno                                            |



# Data Abstraction Guide: GENIE AKT1 Breast Cancer Project

|                             |                                                                                                                                                                                                                                                                                                                                                                                                                                                                                                                                                                                                                                                                                      |
|-----------------------------|--------------------------------------------------------------------------------------------------------------------------------------------------------------------------------------------------------------------------------------------------------------------------------------------------------------------------------------------------------------------------------------------------------------------------------------------------------------------------------------------------------------------------------------------------------------------------------------------------------------------------------------------------------------------------------------|
|                             | Record 'Yes' two or more cancer-directed drugs are given as a regimen.                                                                                                                                                                                                                                                                                                                                                                                                                                                                                                                                                                                                               |
| <b>Directives</b>           | If one cancer directed drug is given, record 'No.'                                                                                                                                                                                                                                                                                                                                                                                                                                                                                                                                                                                                                                   |
| <b>Identifier?</b>          | N                                                                                                                                                                                                                                                                                                                                                                                                                                                                                                                                                                                                                                                                                    |
| <b>Required Field?</b>      | N                                                                                                                                                                                                                                                                                                                                                                                                                                                                                                                                                                                                                                                                                    |
| <b>Field Label</b>          | <b>How many drugs are part of the therapy?</b>                                                                                                                                                                                                                                                                                                                                                                                                                                                                                                                                                                                                                                       |
| <b>REDCap Variable Name</b> | therapy1_combo_num                                                                                                                                                                                                                                                                                                                                                                                                                                                                                                                                                                                                                                                                   |
| <b>Field Type</b>           | dropdown                                                                                                                                                                                                                                                                                                                                                                                                                                                                                                                                                                                                                                                                             |
| <b>Choice List</b>          | 1, 2   2, 3   3, 4                                                                                                                                                                                                                                                                                                                                                                                                                                                                                                                                                                                                                                                                   |
| <b>Directives</b>           | Linked to <i>Does this therapy involve a combination regimen?</i> If the response is 'Yes' Record the number of cancer-directed drugs in the therapy. This data field will control the number of drugs that you can enter for the first line of therapy.                                                                                                                                                                                                                                                                                                                                                                                                                             |
| <b>Identifier?</b>          | N                                                                                                                                                                                                                                                                                                                                                                                                                                                                                                                                                                                                                                                                                    |
| <b>Required Field?</b>      | N                                                                                                                                                                                                                                                                                                                                                                                                                                                                                                                                                                                                                                                                                    |
| <b>Field Label</b>          | <b>Drug 1</b>                                                                                                                                                                                                                                                                                                                                                                                                                                                                                                                                                                                                                                                                        |
| <b>REDCap Variable Name</b> | therapy1_drug1                                                                                                                                                                                                                                                                                                                                                                                                                                                                                                                                                                                                                                                                       |
| <b>Field Type</b>           | Dropdown                                                                                                                                                                                                                                                                                                                                                                                                                                                                                                                                                                                                                                                                             |
| <b>Choice List</b>          | 1, Doxorubicin   2, Pegylated liposomal doxorubicin   3, Paclitaxel   4, Capecitabine   5, Gemcitabine   6, Vinorelbine   7, Eribulin   8, Cyclophosphamide   9, Carboplatin   10, Docetaxel   11, Albumin-bound paclitaxel   12, Cisplatin   13, Epirubicin   14, Ixabepilone   15, Trastuzumab   16, Pertuzumab   17, Ado-trastuzumab emtansine   18, Lapatinib   19, Ovarian suppression/ablation therapy (Leuprolide/Goserelin/ BSO)   20, Anastrozole   21, Letrozole   22, Exemestane   23, Fulvestrant   24, Tamoxifen   25, Toremifene   26, Megestrol acetate   27, Flouxymesterone   38, Ethinyl estradiol   29, Exemestane   30, Everolimus   31, Palbociclib   98, Other |
| <b>Directives</b>           | Choose the first drug in the therapy regimen. If the drug is not listed, record '98, Other.'                                                                                                                                                                                                                                                                                                                                                                                                                                                                                                                                                                                         |
| <b>Identifier?</b>          | N                                                                                                                                                                                                                                                                                                                                                                                                                                                                                                                                                                                                                                                                                    |
| <b>Required Field?</b>      | N                                                                                                                                                                                                                                                                                                                                                                                                                                                                                                                                                                                                                                                                                    |
| <b>Field Label</b>          | <b>Was this administered as part of the clinical trial?</b>                                                                                                                                                                                                                                                                                                                                                                                                                                                                                                                                                                                                                          |
| <b>REDCap Variable Name</b> | therapy1_drug1_clintrial                                                                                                                                                                                                                                                                                                                                                                                                                                                                                                                                                                                                                                                             |
| <b>Field Type</b>           | Yesno                                                                                                                                                                                                                                                                                                                                                                                                                                                                                                                                                                                                                                                                                |
| <b>Directives</b>           | Record 'Yes' if the drug therapy was administered as a part of a clinical trial. Please note that it is not necessary for the drug to be evaluated in the trial in order to record 'Yes.'                                                                                                                                                                                                                                                                                                                                                                                                                                                                                            |
| <b>Identifier?</b>          | N                                                                                                                                                                                                                                                                                                                                                                                                                                                                                                                                                                                                                                                                                    |
| <b>Required Field?</b>      | N                                                                                                                                                                                                                                                                                                                                                                                                                                                                                                                                                                                                                                                                                    |
| <b>Field Label</b>          | <b>Was the drug AZD5363?</b>                                                                                                                                                                                                                                                                                                                                                                                                                                                                                                                                                                                                                                                         |

# Data Abstraction Guide: GENIE AKT1 Breast Cancer Project

|                             |                                                                                                                                                                                                                                                                                                                                                                                                                                                                                                                                                                                                                                                                                                                                                                                                                                                                                                                                                                                                                                                                                                                                                                                                                      |
|-----------------------------|----------------------------------------------------------------------------------------------------------------------------------------------------------------------------------------------------------------------------------------------------------------------------------------------------------------------------------------------------------------------------------------------------------------------------------------------------------------------------------------------------------------------------------------------------------------------------------------------------------------------------------------------------------------------------------------------------------------------------------------------------------------------------------------------------------------------------------------------------------------------------------------------------------------------------------------------------------------------------------------------------------------------------------------------------------------------------------------------------------------------------------------------------------------------------------------------------------------------|
| <b>REDCap Variable Name</b> | therapy1_drug1_azd5363                                                                                                                                                                                                                                                                                                                                                                                                                                                                                                                                                                                                                                                                                                                                                                                                                                                                                                                                                                                                                                                                                                                                                                                               |
| <b>Field Type</b>           | yesno                                                                                                                                                                                                                                                                                                                                                                                                                                                                                                                                                                                                                                                                                                                                                                                                                                                                                                                                                                                                                                                                                                                                                                                                                |
| <b>Directives</b>           | If <b>Drug 1</b> is AZD5363, record 'Yes' else record 'No.'                                                                                                                                                                                                                                                                                                                                                                                                                                                                                                                                                                                                                                                                                                                                                                                                                                                                                                                                                                                                                                                                                                                                                          |
| <b>Identifier?</b>          | N                                                                                                                                                                                                                                                                                                                                                                                                                                                                                                                                                                                                                                                                                                                                                                                                                                                                                                                                                                                                                                                                                                                                                                                                                    |
| <b>Required Field?</b>      | N                                                                                                                                                                                                                                                                                                                                                                                                                                                                                                                                                                                                                                                                                                                                                                                                                                                                                                                                                                                                                                                                                                                                                                                                                    |
| <b>Field Label</b>          | <b>Generic name of drug</b>                                                                                                                                                                                                                                                                                                                                                                                                                                                                                                                                                                                                                                                                                                                                                                                                                                                                                                                                                                                                                                                                                                                                                                                          |
| <b>REDCap Variable Name</b> | therapy1_drug1_other                                                                                                                                                                                                                                                                                                                                                                                                                                                                                                                                                                                                                                                                                                                                                                                                                                                                                                                                                                                                                                                                                                                                                                                                 |
| <b>Field Type</b>           | Text                                                                                                                                                                                                                                                                                                                                                                                                                                                                                                                                                                                                                                                                                                                                                                                                                                                                                                                                                                                                                                                                                                                                                                                                                 |
| <b>Directives</b>           | Linked to <b>Drug</b> . if '98, Other' is noted, record the generic name of the drug.<br>If '98, Other' is not noted, leave blank.                                                                                                                                                                                                                                                                                                                                                                                                                                                                                                                                                                                                                                                                                                                                                                                                                                                                                                                                                                                                                                                                                   |
| <b>Identifier?</b>          | N                                                                                                                                                                                                                                                                                                                                                                                                                                                                                                                                                                                                                                                                                                                                                                                                                                                                                                                                                                                                                                                                                                                                                                                                                    |
| <b>Required Field?</b>      | N                                                                                                                                                                                                                                                                                                                                                                                                                                                                                                                                                                                                                                                                                                                                                                                                                                                                                                                                                                                                                                                                                                                                                                                                                    |
| <b>Field Label</b>          | <b>Therapy 1 Start Date</b>                                                                                                                                                                                                                                                                                                                                                                                                                                                                                                                                                                                                                                                                                                                                                                                                                                                                                                                                                                                                                                                                                                                                                                                          |
| <b>REDCap Variable Name</b> | therapy1_drug1_start                                                                                                                                                                                                                                                                                                                                                                                                                                                                                                                                                                                                                                                                                                                                                                                                                                                                                                                                                                                                                                                                                                                                                                                                 |
| <b>Field Type</b>           | Text                                                                                                                                                                                                                                                                                                                                                                                                                                                                                                                                                                                                                                                                                                                                                                                                                                                                                                                                                                                                                                                                                                                                                                                                                 |
| <b>Valid Field</b>          | mm-dd-yyyy                                                                                                                                                                                                                                                                                                                                                                                                                                                                                                                                                                                                                                                                                                                                                                                                                                                                                                                                                                                                                                                                                                                                                                                                           |
| <b>Directives</b>           | <p>Linked to <b>Was therapy received after primary diagnosis date but before LRR or distant metastatic date?</b> If the response is 'Yes' then <b>Therapy 1, Start Date</b> becomes active.</p> <p>Record the date that the drug was first administered to the patient.</p> <p><u>Note for oral medications:</u> If the first date of administration is not known, record the date the drug was prescribed or ordered or recorded in medical notes as date of therapy initiation.</p> <p>If the full date is not known, estimate the date on using the components that are known.</p> <ul style="list-style-type: none"> <li>• If month and year of the date is known, and the day of the month is not known, record 15 for the day.</li> <li>• If year of the date is known, and the day and month is not known, record 6 (June) for the month and 15 for the day.</li> <li>• If the year is known, and the seasons are noted rather than the month and day, use the following: <ul style="list-style-type: none"> <li>○ For winter use January (1)</li> <li>○ For spring use April (4)</li> <li>○ For summer use July (7)</li> <li>○ For autumn use October (10)</li> </ul> </li> </ul> <p>Do not leave blank.</p> |

# Data Abstraction Guide: GENIE AKT1 Breast Cancer Project

|                             |                                                                                                                                                                                                                                                                                                                                                                                                                                                                                                                                                                                                                                                                                                                                |
|-----------------------------|--------------------------------------------------------------------------------------------------------------------------------------------------------------------------------------------------------------------------------------------------------------------------------------------------------------------------------------------------------------------------------------------------------------------------------------------------------------------------------------------------------------------------------------------------------------------------------------------------------------------------------------------------------------------------------------------------------------------------------|
|                             | <p>If the full date is not known, estimate the date on using the components that are known.</p> <ul style="list-style-type: none"> <li>• If month and year of the date is known, and the day of the month is not known, record 15 for the day.</li> <li>• If year of the date is known, and the day and month is not known, record 6 (June) for the month and 15 for the day.</li> <li>• If the year is known, and the seasons are noted rather than the month and day, use the following: <ul style="list-style-type: none"> <li>○ For winter use January (1)</li> <li>○ For spring use April (4)</li> <li>○ For summer use July (7)</li> <li>○ For autumn use October (10)</li> </ul> </li> </ul> <p>Do not leave blank.</p> |
| <b>Identifier?</b>          | Y; this data element will not be shared with MSK. It will be used to calculate the interval in days.                                                                                                                                                                                                                                                                                                                                                                                                                                                                                                                                                                                                                           |
| <b>Required Field?</b>      | N                                                                                                                                                                                                                                                                                                                                                                                                                                                                                                                                                                                                                                                                                                                              |
| <b>Field Label</b>          | <b>Therapy 1 Start Interval</b>                                                                                                                                                                                                                                                                                                                                                                                                                                                                                                                                                                                                                                                                                                |
| <b>REDCap Variable Name</b> | therapy1_drug1_start_int                                                                                                                                                                                                                                                                                                                                                                                                                                                                                                                                                                                                                                                                                                       |
| <b>Field Type</b>           | Calculated: datediff([dob_date],[reg2_hormo1_start],'d', 'mdy', false)                                                                                                                                                                                                                                                                                                                                                                                                                                                                                                                                                                                                                                                         |
| <b>Directives</b>           | <p>Linked to <b><i>Was Hormone therapy (HT) received after primary diagnosis date but before LRR or distant metastatic date?</i></b> If the response is 'Yes' then <b><i>Therapy 1, Start Date Interval</i></b> becomes active.</p> <p>Dependent upon <b><i>Therapy1 Start Date</i></b>.</p> <p>If the <b><i>Therapy1 Start Date</i></b> was entered, REDCap will calculate this field by subtracting the <b><i>Date of Birth</i></b> from the <b><i>Therapy1 Start Date</i></b>.</p> <p>If the <b><i>Therapy1 Start Date</i></b> was not entered, this data field will remain blank.</p>                                                                                                                                      |
| <b>Identifier?</b>          | N                                                                                                                                                                                                                                                                                                                                                                                                                                                                                                                                                                                                                                                                                                                              |
| <b>Required Field?</b>      | N                                                                                                                                                                                                                                                                                                                                                                                                                                                                                                                                                                                                                                                                                                                              |
| <b>Field Label</b>          | <b>Therapy 1 End Date</b>                                                                                                                                                                                                                                                                                                                                                                                                                                                                                                                                                                                                                                                                                                      |
| <b>REDCap Variable Name</b> | therapy1_drug1_end                                                                                                                                                                                                                                                                                                                                                                                                                                                                                                                                                                                                                                                                                                             |
| <b>Valid Field</b>          | mm-dd-yyyy                                                                                                                                                                                                                                                                                                                                                                                                                                                                                                                                                                                                                                                                                                                     |
| <b>Choice List</b>          | text                                                                                                                                                                                                                                                                                                                                                                                                                                                                                                                                                                                                                                                                                                                           |
| <b>Directives</b>           | <p>Record the last date that the patient received the medication.</p> <p>If the actual last date that the drug was administered is not documented, record the date that the provider stated was the last day of administration in the medical notes.</p> <p>If a patient leaves your institutional care and you are no longer certain of when a</p>                                                                                                                                                                                                                                                                                                                                                                            |

# Data Abstraction Guide: GENIE AKT1 Breast Cancer Project

|                             |                                                                                                                                                                                                                                                                                                                                                                                                                                                                                                                                                                                                                                                                                                                                                                                                                                                                                                                                                                                                                                                                                                                                                                                                                                                                                                                                                                                                                                                                                                                                                                                                                                                                                                                  |
|-----------------------------|------------------------------------------------------------------------------------------------------------------------------------------------------------------------------------------------------------------------------------------------------------------------------------------------------------------------------------------------------------------------------------------------------------------------------------------------------------------------------------------------------------------------------------------------------------------------------------------------------------------------------------------------------------------------------------------------------------------------------------------------------------------------------------------------------------------------------------------------------------------------------------------------------------------------------------------------------------------------------------------------------------------------------------------------------------------------------------------------------------------------------------------------------------------------------------------------------------------------------------------------------------------------------------------------------------------------------------------------------------------------------------------------------------------------------------------------------------------------------------------------------------------------------------------------------------------------------------------------------------------------------------------------------------------------------------------------------------------|
|                             | <p>therapy was discontinued, enter the last known date of therapy administration at your institution.</p> <p>If a drug has not been discontinued, enter the date that the drug was last administered at the time of data abstraction.</p> <p>If a patient has a treatment break or holiday, whereby she starts a hormone therapy and stops the drug for less than or equal to 3 months (90 days) and then re-starts the same medication, record the first start date for <b>Therapy 1 Start Date</b> and the final end date for the therapy as <b>Therapy 1 End Date</b>.</p> <p>If a patient has a treatment break or holiday, whereby she starts a hormone therapy and stops the drug for greater than 3 months (90 days) and then re-starts the same medication, record the first start date and the first end date for <b>Therapy 1 End Date</b>; record the same drug in <b>Therapy 2</b> with the second start date and the final end date for the therapy.</p> <p>If the full date is not known, estimate the date on using the components that are known.</p> <ul style="list-style-type: none"> <li>• If month and year of the date is known, and the day of the month is not known, record 15 for the day.</li> <li>• If year of the date is known, and the day and month is not known, record 6 (June) for the month and 15 for the day.</li> <li>• If the year is known, and the seasons are noted rather than the month and day, use the following:             <ul style="list-style-type: none"> <li>○ For winter use January (1)</li> <li>○ For spring use April (4)</li> <li>○ For summer use July (7)</li> <li>○ For autumn use October (10)</li> </ul> </li> </ul> <p>Do not leave blank.</p> |
| <b>Identifier?</b>          | Y; this data element will not be shared with MSK. It will be used to calculate the interval in days.                                                                                                                                                                                                                                                                                                                                                                                                                                                                                                                                                                                                                                                                                                                                                                                                                                                                                                                                                                                                                                                                                                                                                                                                                                                                                                                                                                                                                                                                                                                                                                                                             |
| <b>Required Field?</b>      | N                                                                                                                                                                                                                                                                                                                                                                                                                                                                                                                                                                                                                                                                                                                                                                                                                                                                                                                                                                                                                                                                                                                                                                                                                                                                                                                                                                                                                                                                                                                                                                                                                                                                                                                |
| <b>Field Label</b>          | <b>Therapy 1 End Interval</b>                                                                                                                                                                                                                                                                                                                                                                                                                                                                                                                                                                                                                                                                                                                                                                                                                                                                                                                                                                                                                                                                                                                                                                                                                                                                                                                                                                                                                                                                                                                                                                                                                                                                                    |
| <b>REDCap Variable Name</b> | therapy1_drug1_end_int                                                                                                                                                                                                                                                                                                                                                                                                                                                                                                                                                                                                                                                                                                                                                                                                                                                                                                                                                                                                                                                                                                                                                                                                                                                                                                                                                                                                                                                                                                                                                                                                                                                                                           |
| <b>Field Type</b>           | Calculated: datediff([dob_date],[reg2_hormo1_start],'d', 'mdy', false)                                                                                                                                                                                                                                                                                                                                                                                                                                                                                                                                                                                                                                                                                                                                                                                                                                                                                                                                                                                                                                                                                                                                                                                                                                                                                                                                                                                                                                                                                                                                                                                                                                           |
| <b>Directives</b>           | <p>Dependent upon <b>Therapy1 End Date</b>.</p> <p>If the <b>Therapy1 End Date</b> was entered, REDCap will calculate this field by subtracting the <b>Date of Birth</b> from the <b>Therapy1 End Date</b>.</p> <p>If the <b>Therapy1 End Date</b> was not entered, this data field will remain blank.</p>                                                                                                                                                                                                                                                                                                                                                                                                                                                                                                                                                                                                                                                                                                                                                                                                                                                                                                                                                                                                                                                                                                                                                                                                                                                                                                                                                                                                       |
| <b>Identifier?</b>          | N                                                                                                                                                                                                                                                                                                                                                                                                                                                                                                                                                                                                                                                                                                                                                                                                                                                                                                                                                                                                                                                                                                                                                                                                                                                                                                                                                                                                                                                                                                                                                                                                                                                                                                                |
| <b>Required Field?</b>      | N                                                                                                                                                                                                                                                                                                                                                                                                                                                                                                                                                                                                                                                                                                                                                                                                                                                                                                                                                                                                                                                                                                                                                                                                                                                                                                                                                                                                                                                                                                                                                                                                                                                                                                                |

# Data Abstraction Guide: GENIE AKT1 Breast Cancer Project

|                             |                                                                                                                                                                                                                                                                                                                                                                                                                                                         |
|-----------------------------|---------------------------------------------------------------------------------------------------------------------------------------------------------------------------------------------------------------------------------------------------------------------------------------------------------------------------------------------------------------------------------------------------------------------------------------------------------|
| <b>Field Label</b>          | <b>Was drug discontinued?</b>                                                                                                                                                                                                                                                                                                                                                                                                                           |
| <b>REDCap Variable Name</b> | therapy1_drug1_discon_yn                                                                                                                                                                                                                                                                                                                                                                                                                                |
| <b>Field Type</b>           | treatment_regimens                                                                                                                                                                                                                                                                                                                                                                                                                                      |
| <b>Choice List</b>          | yesno                                                                                                                                                                                                                                                                                                                                                                                                                                                   |
| <b>Directives</b>           | Record 'Yes' if the hormone therapy has been discontinued.<br><br>If the hormone therapy has not been discontinued at the time of data abstraction, record 'No.'                                                                                                                                                                                                                                                                                        |
| <b>Identifier?</b>          | N                                                                                                                                                                                                                                                                                                                                                                                                                                                       |
| <b>Required Field?</b>      | N                                                                                                                                                                                                                                                                                                                                                                                                                                                       |
| <b>Field Label</b>          | <b>Reason for Discontinuation</b>                                                                                                                                                                                                                                                                                                                                                                                                                       |
| <b>REDCap Variable Name</b> | therapy1_drug1_reason                                                                                                                                                                                                                                                                                                                                                                                                                                   |
| <b>Field Type</b>           | dropdown                                                                                                                                                                                                                                                                                                                                                                                                                                                |
| <b>Choice List</b>          | 0, Completion of Planned Therapy   1, Toxicity   2, Patient Preference   3, Not Effective/Progression of Disease   99, Other/UNK                                                                                                                                                                                                                                                                                                                        |
| <b>Directives</b>           | Linked to <b>Was drug discontinued?</b> If 'Yes' record the reason that the hormone therapy was discontinued.<br><br>If 'No' leave blank.<br><br>If a patient leaves your institutional care and you are no longer certain of when a therapy was discontinued, enter 'Lost to follow-up'.<br><br>If multiple reason exist for drug discontinuation and one of the reasons is for disease progression, record '3, Not Effective/Progression of Disease.' |
| <b>Identifier?</b>          | N                                                                                                                                                                                                                                                                                                                                                                                                                                                       |
| <b>Required Field?</b>      | N                                                                                                                                                                                                                                                                                                                                                                                                                                                       |
| <b>Field Label</b>          | <b>Form Status: Complete?</b>                                                                                                                                                                                                                                                                                                                                                                                                                           |
| <b>REDCap Variable Name</b> |                                                                                                                                                                                                                                                                                                                                                                                                                                                         |
| <b>Field Type</b>           | Dropdown                                                                                                                                                                                                                                                                                                                                                                                                                                                |
| <b>Choice List</b>          | Incomplete   Unverified   Complete                                                                                                                                                                                                                                                                                                                                                                                                                      |
| <b>Directives</b>           | Record 'Complete' once all of the data fields in this section have been entered and the eligibility calculation has been performed. This field will be used during data quality review.<br><br>'Incomplete' is the default choice; patients with any indication of 'Incomplete' or 'Unverified' sections are not eligible for data analysis.                                                                                                            |
| <b>Identifier?</b>          | N                                                                                                                                                                                                                                                                                                                                                                                                                                                       |
| <b>Required Field?</b>      | N                                                                                                                                                                                                                                                                                                                                                                                                                                                       |



# Data Abstraction Guide: GENIE AKT1 Breast Cancer Project

---

## Appendix One: AJCC 7<sup>th</sup> Edition, Staging Guidelines

The patients should be staged using the AJCC 7<sup>th</sup> Edition Guidelines. Here is a quick reference for Breast Cancer

<https://cancerstaging.org/references-tools/quickreferences/Documents/BreastMedium.pdf>
